# Supplementary material for: The Effect of the Mediterranean Diet on Metabolic Health: A Systematic Review and Meta-Analysis of Controlled Trials in Adults
Source: MDPI journal article supplement (doi:10.3390/nu12113342), 2020-10-30
Supplement: s1 [file s1]

| <b>Supplementary number and description</b>                                                                                                                                                                                                                                                                                                                                                                                   | <b>Page</b> |
|-------------------------------------------------------------------------------------------------------------------------------------------------------------------------------------------------------------------------------------------------------------------------------------------------------------------------------------------------------------------------------------------------------------------------------|-------------|
| <b>Supplementary Table S1:</b> PRISMA checklist                                                                                                                                                                                                                                                                                                                                                                               | 2-3         |
| <b>Supplementary Table S2:</b> Search strategy                                                                                                                                                                                                                                                                                                                                                                                | 4-5         |
| <b>Supplementary Table S3:</b> Study selection criteria                                                                                                                                                                                                                                                                                                                                                                       | 6           |
| <b>Supplementary Table S4:</b> Table of excluded papers ( <i>N</i> =116)                                                                                                                                                                                                                                                                                                                                                      | 7-10        |
| <b>Supplementary Table S5:</b> Characteristics of included studies                                                                                                                                                                                                                                                                                                                                                            | 11-18       |
| <b>Supplementary Table S6:</b> Foods provided to the intervention group, for papers reporting on studies that supplemented the dietary advice intervention with foods                                                                                                                                                                                                                                                         | 19-22       |
| <b>Supplementary Table S7:</b> Summary of the findings on anthropometric and blood pressure markers (between-group differences) from the papers not included in the pooled analysis                                                                                                                                                                                                                                           | 23          |
| <b>Supplementary Table S8:</b> Summary of the findings on biochemical and markers of insulin resistance (between-group differences) from the papers (and/or outcomes) not included in the pooled analysis                                                                                                                                                                                                                     | 24-25       |
| <b>Supplementary Table S9:</b> Summary of the findings on oxidative stress, inflammatory and endothelial function markers (between-group differences) from the papers (and/or outcomes) not included in the pooled analysis                                                                                                                                                                                                   | 26          |
| <b>Supplementary Figures S1–S28:</b> Forest plots of controlled trials evaluating the effect of the Mediterranean diet on anthropometric, blood pressure, biochemical, insulin resistance, oxidative stress, inflammatory and endothelial function markers related to the metabolic syndrome                                                                                                                                  | 27-45       |
| <b>Supplementary Figures S29–S36:</b> Forest plots of controlled trials evaluating the effect of the Mediterranean diet on metabolic syndrome-related comorbidities                                                                                                                                                                                                                                                           | 46-49       |
| <b>Supplementary Table S10:</b> Summary of the findings on metabolic syndrome-related comorbidities (between-group differences) from the papers (and/or outcomes) not included in the pooled analysis                                                                                                                                                                                                                         | 50          |
| <b>Supplementary Figures S37–S41:</b> Forest plots of controlled trials evaluating the effect of the Mediterranean diet on metabolic syndrome and/or related comorbidity treatment                                                                                                                                                                                                                                            | 51-53       |
| <b>Supplementary Table S11:</b> Summary of the findings on metabolic syndrome and/or related comorbidity treatment (between-group differences) from the papers (and/or outcomes) not included in the pooled analysis                                                                                                                                                                                                          | 54          |
| <b>Supplementary Figure S42:</b> Risk of bias for papers reporting a randomised controlled trial                                                                                                                                                                                                                                                                                                                              | 55          |
| <b>Supplementary Figures S43–S83:</b> Funnel plots and Egger test of studies evaluating the effect of the Mediterranean diet on anthropometric, blood pressure, biochemical, insulin resistance, oxidative stress, inflammatory and endothelial function markers related to the metabolic syndrome, metabolic syndrome-related comorbidities and metabolic syndrome and/or related comorbidity treatment (SE, standard error) | 56-69       |
| <b>Supplementary Table S12:</b> Detailed risk of bias for each included paper reporting a non-randomised controlled trial                                                                                                                                                                                                                                                                                                     | 70          |
| <b>Supplementary Table S13:</b> Effect of the Mediterranean diet on anthropometric, blood pressure, biochemical, insulin resistance, oxidative stress, inflammatory and endothelial function markers related to the metabolic syndrome, according to different subgroups                                                                                                                                                      | 71-87       |
| <b>Supplementary Table S14:</b> Effect of the Mediterranean diet on anthropometric, blood pressure, biochemical, insulin resistance, oxidative stress, inflammatory and endothelial function markers related to the metabolic syndrome (sensitivity analysis, following the exclusion of non-randomised controlled trials, cross-over trials and trials with $\geq 1,000$ participants)                                       | 88-92       |

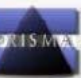

**Supplementary Table S1. PRISMA checklist**

| Section/topic                      | #  | Checklist item                                                                                                                                                                                                                                                                                              | Reported on page #                           |
|------------------------------------|----|-------------------------------------------------------------------------------------------------------------------------------------------------------------------------------------------------------------------------------------------------------------------------------------------------------------|----------------------------------------------|
| <b>TITLE</b>                       |    |                                                                                                                                                                                                                                                                                                             |                                              |
| Title                              | 1  | Identify the report as a systematic review, meta-analysis, or both.                                                                                                                                                                                                                                         | Title page                                   |
| <b>ABSTRACT</b>                    |    |                                                                                                                                                                                                                                                                                                             |                                              |
| Structured summary                 | 2  | Provide a structured summary including, as applicable: background; objectives; data sources; study eligibility criteria, participants, and interventions; study appraisal and synthesis methods; results; limitations; conclusions and implications of key findings; systematic review registration number. | Abstract                                     |
| <b>INTRODUCTION</b>                |    |                                                                                                                                                                                                                                                                                                             |                                              |
| Rationale                          | 3  | Describe the rationale for the review in the context of what is already known.                                                                                                                                                                                                                              | 2                                            |
| Objectives                         | 4  | Provide an explicit statement of questions being addressed with reference to participants, interventions, comparisons, outcomes, and study design (PICOS).                                                                                                                                                  | 2                                            |
| <b>METHODS</b>                     |    |                                                                                                                                                                                                                                                                                                             |                                              |
| Protocol and registration          | 5  | Indicate if a review protocol exists, if and where it can be accessed (e.g., Web address), and, if available, provide registration information including registration number.                                                                                                                               | Abstract and p 2                             |
| Eligibility criteria               | 6  | Specify study characteristics (e.g., PICOS, length of follow-up) and report characteristics (e.g., years considered, language, publication status) used as criteria for eligibility, giving rationale.                                                                                                      | 3 and Supplement: Study Selection Criteria   |
| Information sources                | 7  | Describe all information sources (e.g., databases with dates of coverage, contact with study authors to identify additional studies) in the search and date last searched.                                                                                                                                  | 2-3 and Supplement: Search Strategy          |
| Search                             | 8  | Present full electronic search strategy for at least one database, including any limits used, such that it could be repeated.                                                                                                                                                                               | Supplement: Search Strategy                  |
| Study selection                    | 9  | State the process for selecting studies (i.e., screening, eligibility, included in systematic review, and, if applicable, included in the meta-analysis).                                                                                                                                                   | 3-4 and Supplement: Study Selection Criteria |
| Data collection process            | 10 | Describe method of data extraction from reports (e.g., piloted forms, independently, in duplicate) and any processes for obtaining and confirming data from investigators.                                                                                                                                  | 4                                            |
| Data items                         | 11 | List and define all variables for which data were sought (e.g., PICOS, funding sources) and any assumptions and simplifications made.                                                                                                                                                                       | 3-5 and Supplement: Study Selection Criteria |
| Risk of bias in individual studies | 12 | Describe methods used for assessing risk of bias of individual studies (including specification of whether this was done at the study or outcome level), and how this information is to be used in any data synthesis.                                                                                      | 4                                            |
| Summary measures                   | 13 | State the principal summary measures (e.g., risk ratio, difference in means).                                                                                                                                                                                                                               | 4-5                                          |
| Synthesis of results               | 14 | Describe the methods of handling data and combining results of studies, if done, including measures of consistency (e.g., $I^2$ ) for each meta-analysis.                                                                                                                                                   | 4-5                                          |

| Section/topic                 | #  | Checklist item                                                                                                                                                                                           | Reported on page #                                                                       |
|-------------------------------|----|----------------------------------------------------------------------------------------------------------------------------------------------------------------------------------------------------------|------------------------------------------------------------------------------------------|
| Risk of bias across studies   | 15 | Specify any assessment of risk of bias that may affect the cumulative evidence (e.g., publication bias, selective reporting within studies).                                                             | 4-5                                                                                      |
| Additional analyses           | 16 | Describe methods of additional analyses (e.g., sensitivity or subgroup analyses, meta-regression), if done, indicating which were pre-specified.                                                         | 5                                                                                        |
| <b>RESULTS</b>                |    |                                                                                                                                                                                                          |                                                                                          |
| Study selection               | 17 | Give numbers of studies screened, assessed for eligibility, and included in the review, with reasons for exclusions at each stage, ideally with a flow diagram.                                          | 5, Figure 1 and Supplement: Table of excluded papers                                     |
| Study characteristics         | 18 | For each study, present characteristics for which data were extracted (e.g., study size, PICOS, follow-up period) and provide the citations.                                                             | 5-6, and Supplement: Table 3                                                             |
| Risk of bias within studies   | 19 | Present data on risk of bias of each study and, if available, any outcome level assessment (see item 12).                                                                                                | 10 and Supplement: Figures 43-83                                                         |
| Results of individual studies | 20 | For all outcomes considered (benefits or harms), present, for each study: (a) simple summary data for each intervention group (b) effect estimates and confidence intervals, ideally with a forest plot. | 6-8, Tables 2-3 and Supplement: Figures 1-28, 29-36 and 37-41 and Supplement: Tables 5-7 |
| Synthesis of results          | 21 | Present results of each meta-analysis done, including confidence intervals and measures of consistency.                                                                                                  | 6-8, Tables 2-3 and Supplement: Figures 1-28, 29-36 and 37-41                            |
| Risk of bias across studies   | 22 | Present results of any assessment of risk of bias across studies (see Item 15).                                                                                                                          | 10, Supplement: Figure 42                                                                |
| Additional analysis           | 23 | Give results of additional analyses, if done (e.g., sensitivity or subgroup analyses, meta-regression [see Item 16]).                                                                                    | 10-11 and Supplement: Tables 11-12                                                       |
| <b>DISCUSSION</b>             |    |                                                                                                                                                                                                          |                                                                                          |
| Summary of evidence           | 24 | Summarize the main findings including the strength of evidence for each main outcome; consider their relevance to key groups (e.g., healthcare providers, users, and policy makers).                     | 11-14                                                                                    |
| Limitations                   | 25 | Discuss limitations at study and outcome level (e.g., risk of bias), and at review-level (e.g., incomplete retrieval of identified research, reporting bias).                                            | 11-14                                                                                    |
| Conclusions                   | 26 | Provide a general interpretation of the results in the context of other evidence, and implications for future research.                                                                                  | 11-14                                                                                    |
| <b>FUNDING</b>                |    |                                                                                                                                                                                                          |                                                                                          |
| Funding                       | 27 | Describe sources of funding for the systematic review and other support (e.g., supply of data); role of funders for the systematic review.                                                               | p 15                                                                                     |

## Supplementary Table S2. Search strategy

**Search strategy** (databases searched from inception until 17<sup>th</sup> June 2019)

**Strategy for Pubmed** (field labels were used to restrict specific terms/phrases to Medical Subject Headings [MeSH] or by publication type [pt] and title/abstract [tiab] fields)

1. "mediterranean diet"[tiab] or "mediterranean lifestyle"[tiab] or "mediterranean dietary pattern"[tiab] or "mediterranean style diet"[tiab] or "mediterranean-style diet"[tiab] or "mediterranean diet score"[tiab] or "mediterranean diet index"
  2. Diet, Mediterranean [MeSH]
  3. "metabolic syndrome"[tiab] or "metabolic risk"[tiab] or "metabolic risks"[tiab] or "metabolic markers"[tiab] or "cardiovascular risk factors"[tiab] or "cardiovascular disease risk"[tiab] or "cardiovascular disease risks"[tiab] or "vascular markers"[tiab] or "adiposity"[tiab] or "overweight"[tiab] or "obesity"[tiab] or "obese"[tiab] or "body weight"[tiab] or "weight"[tiab] or "abdominal fat"[tiab] or "body composition"[tiab] or "BMI"[tiab] or "body mass"[tiab] or "waist circumference"[tiab] or "weight loss"[tiab] or "blood pressure"[tiab] or "cholesterol"[tiab] or "triglycerides"[tiab] or "inflammation"[tiab] or "inflammatory markers"[tiab] or "insulin resistance"[tiab] or "oxidative stress"[tiab] or "endothelial function"[tiab]
  4. "type 2 diabetes"[tiab] or "non-alcoholic fatty liver disease"[tiab] or "nonalcoholic fatty liver disease"[tiab] or "non alcoholic fatty liver disease"[tiab] or "NAFLD"[tiab] or "non-alcoholic steatohepatitis"[tiab] or "nonalcoholic steatohepatitis"[tiab] or "non alcoholic steatohepatitis"[tiab] or "NASH"[tiab] or "cardiovascular disease"[tiab] or "cardiovascular diseases"[tiab] or "heart disease"[tiab] or "heart diseases"[tiab] or "coronary heart disease"[tiab] or "coronary artery disease"[tiab] or "stroke"[tiab] or "heart failure"[tiab] or "myocardial infarction"[tiab] or "cancer"[tiab]
  5. Metabolic Syndrome [MeSH] or Inflammation [MeSH] or Insulin Resistance [MeSH] or Oxidative Stress [MeSH]
  6. Obesity [MeSH] or Obesity, Abdominal [MeSH] or Weight loss [MeSH] or Adiposity [MeSH] or Diabetes mellitus, type 2 [MeSH] or Non-alcoholic Fatty Liver Disease [MeSH] or Cardiovascular diseases [MeSH] or Heart Diseases [MeSH] or Coronary Disease [MeSH] or Coronary Artery Disease [MeSH] or Stroke [MeSH] or Cerebrovascular disorders [MeSH] or Heart failure [MeSH] or Myocardial infarction [MeSH] or Neoplasms [MeSH]
  7. "Intervention"[tiab] or "interventions"[tiab] or "controlled trial"[tiab] or "controlled trials"[tiab] or "clinical trial"[tiab] or "RCT"[tiab] or "RCTs"[tiab] or "randomized controlled trial"[tiab] or "randomised controlled trial"[tiab] or "programme"[tiab] or "program"[tiab]
  8. "Cross-Sectional Studies"[MeSH] or Editorial [pt] or Letter [pt] or "case control" [tiab] or "case study" [tiab] or "Case-Control Studies" [MeSH] or "prospective cohort" [tiab] or "cohort studies" [MeSH] or "cohort study" [tiab] or "Longitudinal Studies" [MeSH]
  9. #1 or #2
  10. #3 or #4 or #5 or #6
- Final search: #9 AND #10 AND #7 NOT #8

**Results: 792**

**Strategy for Embase** (field labels were used to restrict specific terms/phrases by publication type and title/abstract/keyword [ti,ab,kw] fields).

1. ("mediterranean diet\$" or "mediterranean lifestyle\$" or "mediterranean dietary pattern" or "mediterranean style diet\$" or "mediterranean-style diet\$" or "mediterranean diet score" or "mediterranean diet index").ti,ab,kw.
  2. ("metabolic syndrome" or "metabolic risk\$" or "metabolic marker\$" or "cardiovascular risk factors" or "cardiovascular disease risk\$" or "vascular marker\$" or adiposity or overweight or obesity or obese or "body weight" or weight or "abdominal fat" or "abdominal obesity" or "body composition" or BMI or "body mass" or "waist circumference" or "weight loss" or "blood pressure" or cholesterol or triglycerides or inflammation or "inflammatory marker\$" or "insulin resistance" or "oxidative stress" or "endothelial function" or "type 2 diabetes" or "non-alcoholic fatty liver disease\$" or "nonalcoholic fatty liver disease\$" or "non alcoholic fatty liver disease\$" or NAFLD or "non-alcoholic steatohepatitis" or "nonalcoholic steatohepatitis" or "non alcoholic steatohepatitis" or NASH or "cardiovascular disease\$" or "heart disease\$" or "coronary heart disease" or "coronary disease\$" or "coronary artery disease\$" or stroke or "cerebrovascular disease\$" or "heart failure" or "myocardial infarction" or cancer\$ or neoplasm\$).ti,ab,kw.
  3. (Intervention\$ or "controlled trial\$" or "clinical trial\$" or RCT\$ or "randomized controlled trial\$" or "randomised controlled trial\$" or programme\$ or program\$ not "Cross-Sectional Studies" not "case control" not "case study" not "case-control\$" not "prospective cohort\$" not "cohort study" not "cohort studies" not "longitudinal studies").ti,ab,kw.
- Final search: #1 AND #2 AND #3

**Results: 1500**

**Strategy for Web of Science** (All terms were searched in "Topic").

1. "mediterranean diet\*" or "mediterranean lifestyle\*" or "mediterranean dietary pattern" or "mediterranean style diet\*" or "mediterranean-style diet\*" or "mediterranean diet score" or "mediterranean diet index"
2. "metabolic syndrome" or "metabolic risk\*" or "metabolic marker\*" or "cardiovascular risk factors" or "cardiovascular disease risk\*" or "vascular marker\*" or adiposity or overweight or obesity or obese or "body weight" or weight or "abdominal fat" or "abdominal obesity" or "body composition" or BMI or "body mass" or "waist circumference" or "weight loss" or "blood pressure" or cholesterol or triglycerides or inflammation or "inflammatory marker\*" or "insulin resistance" or "oxidative stress" or "endothelial function" or "type 2 diabetes" or "non-alcoholic fatty liver disease\*" or "nonalcoholic fatty liver disease\*" or "non alcoholic fatty liver disease\*" or NAFLD or "non-alcoholic steatohepatitis" or "nonalcoholic steatohepatitis" or "non alcoholic steatohepatitis" or NASH or

"cardiovascular disease\*" or "heart disease\*" or "coronary heart disease" or "coronary disease\*" or "coronary artery disease\*" or stroke or "cerebrovascular disease\*" or "heart failure" or "myocardial infarction" or cancer\* or neoplasm\*

3. intervention\* or "controlled trial\*" or "clinical trial\*" or "RCT\*" or "randomized controlled trial\*" or "randomised controlled trial\*" or programme\* or program\*

4. "Cross-Sectional Studies" or Editorial or Letter or "case control" or "case study" or "case-control studies" or "prospective cohort" or "cohort study" or "cohort studies" or "longitudinal studies"

Final search: #1 AND #2 AND #3 NOT #4 (No limitations were used)

**Results: 1877**

**Strategy for CINAHL** (field labels were used to restrict specific terms/phrases by publication type and title/abstract fields)

1. TI ("mediterranean diet" or "mediterranean lifestyle" or "mediterranean dietary pattern" or "mediterranean style diet" or "mediterranean-style diet" or "mediterranean diet score" or "mediterranean diet index") OR AB ("mediterranean diet" or "mediterranean lifestyle" or "mediterranean dietary pattern" or "mediterranean style diet" or "mediterranean-style diet" or "mediterranean diet score" or "mediterranean diet index")

2. TI ("metabolic syndrome" or "metabolic risk" or "metabolic risks" or "metabolic markers" or "cardiovascular risk factors" or "cardiovascular disease risk" or "cardiovascular disease risks" or "vascular markers" or adiposity or overweight or obesity or obese or "body weight" or weight or "abdominal fat" or "abdominal obesity" or "body composition" or BMI or "body mass" or "waist circumference" or "weight loss" or "blood pressure" or cholesterol or triglycerides or inflammation or "inflammatory markers" or "insulin resistance" or "oxidative stress" or "endothelial function" or "type 2 diabetes" or "non-alcoholic fatty liver disease" or "nonalcoholic fatty liver disease" or "non alcoholic fatty liver disease" or NAFLD or "non-alcoholic steatohepatitis" or "nonalcoholic steatohepatitis" or "non alcoholic steatohepatitis" or NASH or "cardiovascular disease" or "cardiovascular diseases" or "heart disease" or "heart diseases" or "coronary heart disease" or "coronary disease" or "coronary artery disease" or stroke or "cerebrovascular disease" or "heart failure" or "myocardial infarction" or cancer or neoplasms) OR AB ("metabolic syndrome" or "metabolic risk" or "metabolic risks" or "metabolic markers" or "cardiovascular risk factors" or "cardiovascular disease risk" or "cardiovascular disease risks" or "vascular markers" or adiposity or overweight or obesity or obese or "body weight" or weight or "abdominal fat" or "abdominal obesity" or "body composition" or BMI or "body mass" or "waist circumference" or "weight loss" or "blood pressure" or cholesterol or triglycerides or inflammation or "inflammatory markers" or "insulin resistance" or "oxidative stress" or "endothelial function" or "type 2 diabetes" or "non-alcoholic fatty liver disease" or "nonalcoholic fatty liver disease" or "non alcoholic fatty liver disease" or NAFLD or "non-alcoholic steatohepatitis" or "nonalcoholic steatohepatitis" or "non alcoholic steatohepatitis" or NASH or "cardiovascular disease" or "cardiovascular diseases" or "heart disease" or "heart diseases" or "coronary heart disease" or "coronary disease" or "coronary artery disease" or stroke or "cerebrovascular disease" or "heart failure" or "myocardial infarction" or cancer or neoplasms)

3. TI (intervention or interventions or "controlled trial" or "controlled trials" or "clinical trial" or RCT or RCTs or "randomized controlled trial" or "randomised controlled trial" or programme or program) OR AB (intervention or interventions or "controlled trial" or "controlled trials" or "clinical trial" or RCT or RCTs or "randomized controlled trial" or "randomised controlled trial" or programme or program)

4. PT (Editorial or Letter)

5. TI ("cross-sectional" or "case control" or "case study" or "case-control" or "prospective cohort" or "cohort study" or "longitudinal") OR AB ("cross-sectional" or "case control" or "case study" or "case-control" or "prospective cohort" or "cohort study" or "longitudinal")

Final search: #1 AND #2 AND #3 NOT #4 NOT #5 (limit to humans)

**Results: 189**

## **Supplementary Table S3. Study selection criteria**

### ***Population***

Studies were included in the review if they involved adults (aged  $\geq 18$  years), including those with established metabolic syndrome (MetSyn), metabolic risk factors (e.g. hyperlipidemia) and/or MetSyn-related comorbidities, e.g. type 2 diabetes, non-alcohol fatty liver disease (NAFLD), cardiovascular disease (CVD), cancer. Studies were excluded if participants were children and/or adolescents, pregnant or lactating women and adults with psychiatric conditions, HIV or conditions that might affect the ability to eat certain foods, such as asthma, renal failure or diseases of the gastrointestinal tract.

### ***Intervention(s)***

Studies were included if the intervention group received an intervention promoting the whole Mediterranean diet (MD) or MD-style diet. As physical activity was an integral component of the traditional Mediterranean lifestyle and forms an essential component of lifestyle modification for MetSyn prevention and management, studies were also eligible if the intervention promoted the MD concurrently with physical activity, as long as physical activity was equally promoted in the control group. Studies in which the intervention contained further components, such as stress management or smoking cessation, or in which there was a focus on specific foods or components of the MD (instead of the whole diet), were excluded.

### ***Comparison(s)***

Studies were included if the comparator/control group received no treatment, usual care, or advice to follow a different diet (e.g. a low-fat diet), with or without physical activity, as long as physical activity was also promoted equally to the intervention group. Studies were excluded if they did not have a control group, or if the MD was promoted to both the intervention and control groups.

### ***Outcome(s)***

We specifically focused on outcomes that are commonly assessed or reported in everyday clinical practice in order to enhance relevance and the translational potential of the findings to practitioners and clinicians. Studies were included if they reported at least one of the following, either as a primary or secondary outcome: 1) MetSyn incidence; 2) MetSyn components (waist circumference, systolic and/or diastolic blood pressure, and blood concentrations of HDL-cholesterol, triglycerides and fasting glucose), and additional risk factors, such as body weight, body mass index, body composition (total fat mass and % body fat), and blood concentrations of insulin, glycosylated haemoglobin, total- and LDL-cholesterol, markers of inflammation and endothelial function (e.g. C-reactive protein, interleukin (IL)-6, adiponectin, tumor necrosis factor  $\alpha$ , or flow-mediated dilatation), markers of insulin resistance (e.g. homeostatic model assessment-insulin resistance and markers of oxidative stress (e.g. oxidised LDL-cholesterol or total antioxidant capacity); 3) Incidence and/or mortality from MetSyn comorbidities, including type 2 diabetes, NAFLD, CVD, such as coronary heart disease, stroke and heart failure, and cancer), and; 4) Outcomes related to medication/therapy received for these comorbidities (e.g. % of participants receiving medication post-intervention).

### ***Study design***

All original controlled trials (randomised and non-randomised), reporting pre- and post-intervention findings for the outcomes of interest and of any length of further follow-up were eligible. Studies with different methodological designs (e.g. cohort, case-control, cross-sectional etc), peer-reviewed study protocols that did not report preliminary findings, book chapters, editorials and conference abstracts were excluded.

**Supplementary Table S4.** Table of excluded papers ( $N=116$ )

| Author                          | Title                                                                                                                                                                                                                                                                                                          | Reason                                                                        |
|---------------------------------|----------------------------------------------------------------------------------------------------------------------------------------------------------------------------------------------------------------------------------------------------------------------------------------------------------------|-------------------------------------------------------------------------------|
| No author listed                | A novel model of clinical exercise delivery reduces blood pressure in hypertensive individuals                                                                                                                                                                                                                 | Ineligible study design                                                       |
| Abenavoli, <i>et al.</i>        | Effect of Mediterranean Diet and Antioxidant Formulation in Non-Alcoholic Fatty Liver Disease: A Randomized Study                                                                                                                                                                                              | Ineligible type of intervention/ control                                      |
| Abendroth, <i>et al.</i>        | Changes of Intestinal Microflora in Patients with Rheumatoid Arthritis during Fasting or a Mediterranean Diet                                                                                                                                                                                                  | Could not retrieve full text                                                  |
| Alonso-Dominguez, <i>et al.</i> | Effectiveness of a multifactorial intervention in increasing adherence to the mediterranean diet among patients with diabetes mellitus type 2: A controlled and randomized study (EMID study)                                                                                                                  | Ineligible type of intervention/ control                                      |
| Andreoli, <i>et al.</i>         | Effect of a moderately hypoenergetic Mediterranean diet and exercise program on body cell mass and cardiovascular risk factors in obese women                                                                                                                                                                  | Ineligible study design                                                       |
| Avellone, <i>et al.</i>         | Effects of Mediterranean diet on lipid, coagulative and fibrinolytic parameters in two randomly selected population samples in Western Sicily                                                                                                                                                                  | Could not retrieve full text                                                  |
| Avellone, <i>et al.</i>         | Cross-over study on effects of Mediterranean diet in two randomly selected population samples                                                                                                                                                                                                                  | Unusable data                                                                 |
| Bekkouche, <i>et al.</i>        | The mediterranean diet adoption improves metabolic, oxidative, and inflammatory abnormalities in Algerian metabolic syndrome patients                                                                                                                                                                          | Ineligible outcomes                                                           |
| Blanco-Rojo, <i>et al.</i>      | The insulin resistance phenotype (muscle or liver) interacts with the type of diet to determine changes in disposition index after 2 years of intervention: the CORDIOPREV-DIAB randomised clinical trial                                                                                                      | Ineligible outcomes                                                           |
| Boidin, <i>et al.</i>           | Effect of aquatic interval training with Mediterranean diet counseling in obese patients: Results of a preliminary study                                                                                                                                                                                       | Ineligible type of intervention/ control                                      |
| Bonfanti, <i>et al.</i>         | Effect of two hypocaloric diets and their combination with physical exercise on basal metabolic rate and body composition                                                                                                                                                                                      | Ineligible language                                                           |
| Brauer, <i>et al.</i>           | Nutrient Intake and Dietary Quality Changes within a Personalized Lifestyle Intervention Program for Metabolic Syndrome in Primary Care                                                                                                                                                                        | Ineligible outcomes                                                           |
| Bruno, <i>et al.</i>            | Adherence to Mediterranean Diet and Metabolic Syndrome in BRCA Mutation Carriers                                                                                                                                                                                                                               | Ineligible type of intervention/ control                                      |
| Bullo, <i>et al.</i>            | Mediterranean Diet and High Dietary Acid Load Associated with Mixed Nuts: Effect on Bone Metabolism in Elderly Subjects                                                                                                                                                                                        | Refers to the PREDIMED study, less complete outcomes than the primary sources |
| Canfi, <i>et al.</i>            | Effect of changes in the intake of weight of specific food groups on successful body weight loss during a multi-dietary strategy intervention trial                                                                                                                                                            | Ineligible outcomes                                                           |
| Casas, <i>et al.</i>            | Anti-Inflammatory Effects of the Mediterranean Diet in the Early and Late Stages of Atheroma Plaque Development                                                                                                                                                                                                | Refers to the PREDIMED study, less complete outcomes than the primary sources |
| Casas, <i>et al.</i>            | The Effects of the Mediterranean Diet on Biomarkers of Vascular Wall Inflammation and Plaque Vulnerability in Subjects with High Risk for Cardiovascular Disease. A Randomized Trial                                                                                                                           | Refers to the PREDIMED study, less complete outcomes than the primary sources |
| Clements, <i>et al.</i>         | Age-Associated Decline in Dendritic Cell Function and the Impact of Mediterranean Diet Intervention in Elderly Subjects                                                                                                                                                                                        | Ineligible outcomes                                                           |
| Corella, <i>et al.</i>          | Mediterranean diet reduces the adverse effect of the TCF7L2-rs7903146 polymorphism on cardiovascular risk factors and stroke incidence: A randomized controlled trial in a high-cardiovascular-risk population                                                                                                 | Ineligible outcomes                                                           |
| Cueto-Galán, <i>et al.</i>      | Changes in fatty liver index after consuming a Mediterranean diet: 6-Year follow-up of the PREDIMED-Malaga trial                                                                                                                                                                                               | Unusable data                                                                 |
| Damasceno, <i>et al.</i>        | Mediterranean diet supplemented with nuts reduces waist circumference and shifts lipoprotein subfractions to a less atherogenic pattern in subjects at high cardiovascular risk                                                                                                                                | Refers to the PREDIMED study, less complete outcomes than the primary sources |
| Davis, <i>et al.</i>            | Older Australians Can Achieve High Adherence to the Mediterranean Diet during a 6 Month Randomised Intervention; Results from the Medley Study                                                                                                                                                                 | Ineligible outcomes                                                           |
| de la Puebla, <i>et al.</i>     | A reduction in dietary saturated fat decreases body fat content in overweight, hypercholesterolemic males                                                                                                                                                                                                      | Unusable data                                                                 |
| De Lorenzo, <i>et al.</i>       | Mediterranean meal versus Western meal effects on postprandial ox-LDL, oxidative and inflammatory gene expression in healthy subjects: a randomized controlled trial for nutrigenomic approach in cardiometabolic risk                                                                                         | Ineligible type of intervention/ control                                      |
| Delgado-Lista, <i>et al.</i>    | CORonary Diet Intervention with Olive oil and cardiovascular PREvention study (the CORDIOPREV study): Rationale, methods, and baseline characteristics: A clinical trial comparing the efficacy of a Mediterranean diet rich in olive oil versus a low-fat diet on cardiovascular disease in coronary patients | Unusable data                                                                 |
| Dewell, <i>et al.</i>           | Antioxidants from diet or supplements do not alter inflammatory markers in adults with cardiovascular disease risk. A pilot randomized controlled trial                                                                                                                                                        | Ineligible type of intervention/ control                                      |
| Di Renzo, <i>et al.</i>         | Influence of FTO rs9939609 and Mediterranean diet on body composition and weight loss: a randomized clinical trial                                                                                                                                                                                             | Ineligible outcomes                                                           |
| Djuric, <i>et al.</i>           | A Mediterranean dietary intervention in healthy American women changes plasma carotenoids and fatty acids in distinct clusters                                                                                                                                                                                 | Ineligible type of intervention/ control                                      |
| Djuric, <i>et al.</i>           | Effects of a Mediterranean Diet Intervention on Anti- and Pro-Inflammatory Eicosanoids, Epithelial Proliferation, and Nuclear Morphology in Biopsies of Normal Colon Tissue                                                                                                                                    | Ineligible type of intervention/ control                                      |
| Domenech, <i>et al.</i>         | Mediterranean Diet Reduces 24-Hour Ambulatory Blood Pressure, Blood Glucose, and Lipids: One-Year Randomized, Clinical Trial                                                                                                                                                                                   | Refers to the PREDIMED study, less complete outcomes than the primary sources |
| Due, <i>et al.</i>              | The effect of three different ad libitum diets for weight loss maintenance: a randomized 18-month trial                                                                                                                                                                                                        | Ineligible type of intervention/ control                                      |

|                              |                                                                                                                                                                                                                    |                                                                                                  |
|------------------------------|--------------------------------------------------------------------------------------------------------------------------------------------------------------------------------------------------------------------|--------------------------------------------------------------------------------------------------|
| Ellsworth, <i>et al.</i>     | Lifestyle modification interventions differing in intensity and dietary stringency improve insulin resistance through changes in lipoprotein profiles                                                              | Ineligible type of intervention/ control                                                         |
| Errazuriz, <i>et al.</i>     | Randomized Controlled Trial of a MUFA or Fiber-Rich Diet on Hepatic Fat in Prediabetes                                                                                                                             | Ineligible type of intervention/ control                                                         |
| Esposito, <i>et al.</i>      | Long-term effect of mediterranean-style diet and calorie restriction on biomarkers of longevity and oxidative stress in overweight men                                                                             | Ineligible type of intervention/ control                                                         |
| Esposito, <i>et al.</i>      | Synergistic Interplay between Curcumin and Polyphenol-Rich Foods in the Mediterranean Diet: Therapeutic Prospects for Neurofibromatosis 1 Patients                                                                 | Ineligible type of paper                                                                         |
| Fito, <i>et al.</i>          | Effect of a Traditional Mediterranean Diet on Lipoprotein Oxidation: A Randomized Controlled Trial                                                                                                                 | Refers to the same study as Fito et al (2014), less complete outcomes than the primary source    |
| Fuentes, <i>et al.</i>       | Mediterranean and Low-Fat Diets Improve Endothelial Function in Hypercholesterolemic Men                                                                                                                           | Unusable data                                                                                    |
| Gadgil, <i>et al.</i>        | The Effects of Carbohydrate, Unsaturated Fat, and Protein Intake on Measures of Insulin Sensitivity                                                                                                                | Ineligible type of intervention/ control                                                         |
| Garaulet, <i>et al.</i>      | CLOCK gene is implicated in weight reduction in obese patients participating in a dietary programme based on the Mediterranean diet                                                                                | Ineligible outcomes                                                                              |
| Garcia-Rios, <i>et al.</i>   | Beneficial effect of CLOCK gene polymorphism rs1801260 in combination with low-fat diet on insulin metabolism in the patients with metabolic syndrome                                                              | Ineligible outcomes                                                                              |
| Garcia-Silva, <i>et al.</i>  | Efficacy of Cognitive Behavioral Therapy in Adherence to the Mediterranean Diet in Metabolic Syndrome Patients: A Randomized Controlled Trial                                                                      | Ineligible type of intervention/ control                                                         |
| Gelli, <i>et al.</i>         | Effect of a counseling-supported treatment with the Mediterranean diet and physical activity on the severity of the non-alcoholic fatty liver disease                                                              | Ineligible study design                                                                          |
| Gepner, <i>et al.</i>        | Intramyocellular triacylglycerol accumulation across weight loss strategies; Sub-study of the CENTRAL trial                                                                                                        | Ineligible outcomes                                                                              |
| Gepner, <i>et al.</i>        | The beneficial effects of Mediterranean diet over low-fat diet may be mediated by decreasing hepatic fat content                                                                                                   | Refers to the same study as Gepner et al (2018), less complete outcomes than the primary sources |
| Giallauria, <i>et al.</i>    | Exercise training improves heart rate recovery in women with breast cancer                                                                                                                                         | Ineligible type of intervention/ control                                                         |
| Giallauria, <i>et al.</i>    | Exercise training improves cardiopulmonary and endothelial function in women with breast cancer: findings from the Diana-5 dietary intervention study                                                              | Ineligible type of intervention/ control                                                         |
| Gomez-Huelgas, <i>et al.</i> | Impact of Intensive Lifestyle Modification on Levels of Adipokines and Inflammatory Biomarkers in Metabolically Healthy Obese Women                                                                                | Ineligible study design                                                                          |
| Gomez-Marin <i>et al.</i>    | Long-term consumption of a Mediterranean diet improves postprandial lipemia in patients with type 2 diabetes: the Cordioprev randomized trial                                                                      | Unusable data                                                                                    |
| Granata, <i>et al.</i>       | Dietary Enterolactone Affects Androgen and Estrogen Levels in Healthy Postmenopausal Women                                                                                                                         | Ineligible outcomes                                                                              |
| Grimaldi, <i>et al.</i>      | Intensive dietary intervention promoting the Mediterranean diet in people with high cardiometabolic risk: a non-randomized study                                                                                   | Ineligible type of intervention/ control                                                         |
| Hernaez, <i>et al.</i>       | Mediterranean Diet Improves High-Density Lipoprotein Function in High-Cardiovascular-Risk Individuals: A Randomized Controlled Trial                                                                               | Refers to the PREDIMED study, less complete outcomes than the primary sources                    |
| Hernaez, <i>et al.</i>       | The Mediterranean Diet decreases LDL atherogenicity in high cardiovascular risk individuals: a randomized controlled trial                                                                                         | Refers to the PREDIMED study, less complete outcomes than the primary sources                    |
| Ijzelenberg, <i>et al.</i>   | The effect of a comprehensive lifestyle intervention on cardiovascular risk factors in pharmacologically treated patients with stable cardiovascular disease compared to usual care: a randomised controlled trial | Ineligible type of intervention/ control                                                         |
| Itsopoulos, <i>et al.</i>    | Can the Mediterranean diet lower HbA1c in type 2 diabetes? Results from a randomized cross-over study                                                                                                              | Unusable data                                                                                    |
| Jeejeebhoy, <i>et al.</i>    | Family physician-led, team-based, lifestyle intervention in patients with metabolic syndrome: results of a multicentre feasibility project                                                                         | Ineligible study design                                                                          |
| Jennings, <i>et al.</i>      | A Mediterranean-like dietary pattern with vitamin D3 (10 microg/d) supplements reduced the rate of bone loss in older Europeans with osteoporosis at baseline: results of a 1-y randomized controlled trial        | Ineligible outcomes                                                                              |
| Jennings, <i>et al.</i>      | Effectiveness of a preventive cardiology programme for high CVD risk persistent smokers: the EUROACTION PLUS varenicline trial                                                                                     | Ineligible type of intervention/ control                                                         |
| Kiechle, <i>et al.</i>       | Feasibility of structured endurance training and Mediterranean diet in BRCA1 and BRCA2 mutation carriers - an interventional randomized controlled multicenter trial (LIBRE-1)                                     | Ineligible type of intervention/ control                                                         |
| Klein, <i>et al.</i>         | The CHANGE program Exercise intervention in primary care                                                                                                                                                           | Ineligible type of intervention/ control                                                         |
| Klonizakis, <i>et al.</i>    | Long-term effects of an exercise and Mediterranean diet intervention in the vascular function of an older, healthy population                                                                                      | Ineligible type of intervention/ control                                                         |
| Klonizakis, <i>et al.</i>    | Mediterranean diet- and exercise-induced improvement in age-dependent vascular activity                                                                                                                            | Ineligible type of intervention/ control                                                         |
| Knight, <i>et al.</i>        | A randomised controlled intervention trial evaluating the efficacy of a Mediterranean dietary pattern on cognitive function and psychological wellbeing in healthy older adults: the MedLey study                  | Ineligible type of paper                                                                         |
| Korre, <i>et al.</i>         | Survival Mediterranean Style: Lifestyle Changes to Improve the Health of the US Fire Service                                                                                                                       | Ineligible type of paper                                                                         |
| Laake, <i>et al.</i>         | Effects on Serum Fractalkine by Diet and Omega-3 Fatty Acid Intervention: Relation to Clinical Outcome                                                                                                             | Ineligible type of intervention/ control                                                         |
| Leighton, <i>et al.</i>      | Plasma polyphenols and antioxidants, oxidative DNA damage and endothelial function in a diet and wine intervention study in humans                                                                                 | Ineligible type of paper                                                                         |



|                                  |                                                                                                                                                                                                  |                                                                                                           |
|----------------------------------|--------------------------------------------------------------------------------------------------------------------------------------------------------------------------------------------------|-----------------------------------------------------------------------------------------------------------|
| Leighton, <i>et al.</i>          | Health impact of Mediterranean diets in food at work                                                                                                                                             | Ineligible study design                                                                                   |
| Lindman, <i>et al.</i>           | The effects of long-term diet and omega-3 fatty acid supplementation on coagulation factor VII and serum phospholipids with special emphasis on the R353Q polymorphism of the FVII gene          | Refers to the same study as Hjerkin et al, Troseid et al, less complete outcomes than the primary sources |
| Lombardo, <i>et al.</i>          | Morning Meal More Efficient for Fat Loss in a 3-Month Lifestyle Intervention                                                                                                                     | Ineligible type of intervention/ control                                                                  |
| Lopez-Moreno, <i>et al.</i>      | Mediterranean Diet Supplemented With Coenzyme Q10 Modulates the Postprandial Metabolism of Advanced Glycation End Products in Elderly Men and Women                                              | Ineligible outcomes                                                                                       |
| Maciejewska, <i>et al.</i>       | Seeking Optimal Nutrition for Healthy Body Mass Reduction among Former Athletes                                                                                                                  | Ineligible outcomes                                                                                       |
| Marcos-Forniol, <i>et al.</i>    | Secondary prevention programme of ischaemic heart disease in the elderly: A randomised clinical trial                                                                                            | Ineligible type of intervention/ control                                                                  |
| Marques-Rocha, <i>et al.</i>     | Expression of inflammation-related miRNAs in white blood cells from subjects with metabolic syndrome after 8 wk of following a Mediterranean diet-based weight loss program                      | Ineligible study design                                                                                   |
| Mayneris-Perxachs, <i>et al.</i> | Effects of 1-Year Intervention with a Mediterranean Diet on Plasma Fatty Acid Composition and Metabolic Syndrome in a Population at High Cardiovascular Risk                                     | Ineligible outcomes                                                                                       |
| Mayr, <i>et al.</i>              | Improvement in dietary inflammatory index score after 6-month dietary intervention is associated with reduction in interleukin-6 in patients with coronary heart disease: The AUSMED heart trial | Ineligible study design                                                                                   |
| Mena, <i>et al.</i>              | Inhibition of circulating immune cell activation: a molecular antiinflammatory effect of the Mediterranean diet                                                                                  | Refers to the PREDIMED study, less complete outcomes than the primary sources                             |
| Mezzano, <i>et al.</i>           | Mediterranean diet, but not red wine, is associated with beneficial changes in primary haemostasis                                                                                               | Ineligible outcomes                                                                                       |
| Michalsen, <i>et al.</i>         | Effects of lifestyle modification on the progression of coronary atherosclerosis, autonomic function, and angina - The role of GNB3 C825T polymorphism                                           | Ineligible type of intervention/ control                                                                  |
| Michalsen, <i>et al.</i>         | Mediterranean diet has no effect on markers of inflammation and metabolic risk factors in patients with coronary artery disease                                                                  | Ineligible type of intervention/ control                                                                  |
| Mitjavila, <i>et al.</i>         | The Mediterranean diet improves the systemic lipid and DNA oxidative damage in metabolic syndrome individuals. A randomized, controlled, trial                                                   | Ineligible outcomes                                                                                       |
| Mlakar, <i>et al.</i>            | The effect of cardioprotective diet rich with natural antioxidants on chronic inflammation and oxidized LDL during cardiac rehabilitation in patients after acute myocardial infarction          | Ineligible type of intervention/ control                                                                  |
| Monlezun, <i>et al.</i>          | Medical school-based teaching kitchen improves HbA1c, blood pressure, and cholesterol for patients with type 2 diabetes: Results from a novel randomized controlled trial                        | Unusable data                                                                                             |
| Murie-Fernandez, <i>et al.</i>   | Carotid intima-media thickness changes with Mediterranean diet: A randomized trial (PREDIMED-Navarra)                                                                                            | Refers to the PREDIMED study, less complete outcomes than the primary sources                             |
| Panunzio, <i>et al.</i>          | Randomized, controlled nutrition education trial promotes a Mediterranean diet and improves anthropometric, dietary, and metabolic parameters in adults                                          | Ineligible language                                                                                       |
| Paoli, <i>et al.</i>             | Long Term Successful Weight Loss with a Combination Biphasic Ketogenic Mediterranean Diet and Mediterranean Diet Maintenance Protocol                                                            | Ineligible type of intervention/ control                                                                  |
| Pasanisi, <i>et al.</i>          | A dietary intervention to lower serum levels of IGF-I in BRCA mutation carriers                                                                                                                  | Ineligible type of intervention/ control                                                                  |
| Perez-Jimenez, <i>et al.</i>     | A Mediterranean and a high-carbohydrate diet improve glucose metabolism in healthy young persons                                                                                                 | Unusable data                                                                                             |
| Perez-Martinez, <i>et al.</i>    | Consumption of diets with different type of fat influences triacylglycerols-rich lipoproteins particle number and size during the postprandial state                                             | Unusable data                                                                                             |
| Perona, <i>et al.</i>            | Reduction in systemic and VLDL triacylglycerol concentration after a 3-month Mediterranean-style diet in high-cardiovascular-risk subjects                                                       | Ineligible outcomes                                                                                       |
| Porenta, <i>et al.</i>           | Interaction of Fatty Acid Genotype and Diet on Changes in Colonic Fatty Acids in a Mediterranean Diet Intervention Study                                                                         | Ineligible outcomes                                                                                       |
| Porenta, <i>et al.</i>           | Correction: Interaction of fatty acid genotype and diet on changes in colonic fatty acids in a Mediterranean diet intervention study (Cancer Prevention Research (2013) 6, (1212-1221))          | Ineligible outcomes                                                                                       |
| Razquin, <i>et al.</i>           | A 3 years follow-up of a Mediterranean diet rich in virgin olive oil is associated with high plasma antioxidant capacity and reduced body weight gain                                            | Refers to the same study as Storniole et al (2017), less complete outcomes than the primary source        |
| Renaud, <i>et al.</i>            | Cretan Mediterranean diet for prevention of coronary heart disease                                                                                                                               | Ineligible outcomes                                                                                       |
| Richard, <i>et al.</i>           | Effect of Mediterranean Diet With and Without Weight Loss on Apolipoprotein B100 Metabolism in Men With Metabolic Syndrome                                                                       | Refers to the same study as Richard et al (2011, 2013), less complete outcomes than the primary sources   |
| Roncero-Ramos, <i>et al.</i>     | Prediabetes diagnosis criteria, type 2 diabetes risk and dietary modulation: The CORDIOPREV study                                                                                                | Unusable data                                                                                             |
| Salas-Salvado, <i>et al.</i>     | Effect of a Mediterranean Diet Supplemented With Nuts on Metabolic Syndrome Status: <i>One-Year Results of the PREDIMED Randomized Trial</i>                                                     | Refers to the same study as Babio et al (2014), less complete outcomes than the primary source            |
| Salas-Salvado, <i>et al.</i>     | Reduction in the Incidence of Type 2 Diabetes With the Mediterranean Diet: Results of the PREDIMED-Reus nutrition intervention randomized trial                                                  | Refers to the same study as Salas-Salvado et al (2014), less complete outcomes than the primary source    |

|                               |                                                                                                                                                                                                                                           |                                                                                                    |
|-------------------------------|-------------------------------------------------------------------------------------------------------------------------------------------------------------------------------------------------------------------------------------------|----------------------------------------------------------------------------------------------------|
| Sen, <i>et al.</i>            | Relationships between serum and colon concentrations of carotenoids and fatty acids in randomized dietary intervention trial                                                                                                              | Ineligible outcomes                                                                                |
| Sondergaard, <i>et al.</i>    | Effect of dietary intervention and lipid-lowering treatment on brachial vasoreactivity in patients with ischemic heart disease and hypercholesterolemia                                                                                   | Ineligible type of paper                                                                           |
| Soto Rodriguez, <i>et al.</i> | Benefits of an educational intervention on diet and anthropometric profile of women with one cardiovascular risk factor                                                                                                                   | Ineligible type of intervention/ control                                                           |
| Sureda, <i>et al.</i>         | Mediterranean diets supplemented with virgin olive oil and nuts enhance plasmatic antioxidant capabilities and decrease xanthine oxidase activity in people with metabolic syndrome: The PREDIMED study                                   | Ineligible outcomes                                                                                |
| Tirosh, <i>et al.</i>         | Renal function following three distinct weight loss dietary strategies during 2 years of a randomized controlled trial                                                                                                                    | Ineligible outcomes                                                                                |
| Torres-Pena, <i>et al.</i>    | Mediterranean diet improves endothelial function in patients with diabetes and prediabetes: A report from the CORDIOPREV study                                                                                                            | Unusable data                                                                                      |
| Tripp, <i>et al.</i>          | A Low-Glycemic, Mediterranean Diet and Lifestyle Modification Program with Targeted Nutraceuticals Reduces Body Weight, Improves Cardiometabolic Variables and Longevity Biomarkers in Overweight Subjects: A 13-Week Observational Trial | Ineligible type of intervention/ control                                                           |
| Trovato, <i>et al.</i>        | Mediterranean diet and non-alcoholic fatty liver disease: The need of extended and comprehensive interventions                                                                                                                            | Ineligible study design                                                                            |
| Tsaban, <i>et al.</i>         | Dynamics of intrapericardial and extrapericardial fat tissues during long-term, dietary-induced, moderate weight loss                                                                                                                     | Ineligible outcomes                                                                                |
| Umoh, <i>et al.</i>           | Markers of systemic exposures to products of intestinal bacteria in a dietary intervention study                                                                                                                                          | Ineligible outcomes                                                                                |
| Urpi-Sarda, <i>et al.</i>     | Virgin olive oil and nuts as key foods of the Mediterranean diet effects on inflammatory biomarkers related to atherosclerosis                                                                                                            | Ineligible type of paper                                                                           |
| Urpi-Sarda, <i>et al.</i>     | The Mediterranean Diet Pattern and Its Main Components Are Associated with Lower Plasma Concentrations of Tumor Necrosis Factor Receptor 60 in Patients at High Risk for Cardiovascular Disease                                           | Refers to the PREDIMED study, less complete outcomes than the primary sources                      |
| Urquiaga, <i>et al.</i>       | Effect of Mediterranean and Occidental diets, and red wine, on plasma fatty acids in humans. An intervention study                                                                                                                        | Ineligible outcomes                                                                                |
| Urquiaga, <i>et al.</i>       | Mediterranean diet and red wine protect against oxidative damage in young volunteers                                                                                                                                                      | Unusable data                                                                                      |
| Villarini, <i>et al.</i>      | Preventing weight gain during adjuvant chemotherapy for breast cancer: a dietary intervention study                                                                                                                                       | Ineligible type of intervention/ control                                                           |
| Wang, <i>et al.</i>           | Plasma Ceramides, Mediterranean Diet, and Incident Cardiovascular Disease in the PREDIMED Trial (Prevención con Dieta Mediterránea)                                                                                                       | Ineligible outcomes                                                                                |
| Weber, <i>et al.</i>          | Effects of Brazilian Cardioprotective Diet Program on risk factors in patients with coronary heart disease: a Brazilian Cardioprotective Diet randomized pilot trial                                                                      | Ineligible type of intervention/ control                                                           |
| Yubero-Serrano, <i>et al.</i> | Postprandial antioxidant effect of the Mediterranean diet supplemented with coenzyme Q10 in elderly men and women                                                                                                                         | Unusable data                                                                                      |
| Zambon, <i>et al.</i>         | Substituting walnuts for monounsaturated fat improves the serum lipid profile of hypercholesterolemic men and women - A randomized crossover trial                                                                                        | Ineligible type of intervention/ control                                                           |
| Zamora-Ros, <i>et al.</i>     | Mediterranean diet and non enzymatic antioxidant capacity in the PREDIMED study: Evidence for a mechanism of antioxidant tuning                                                                                                           | Refers to the same study as Storniolo et al (2017), less complete outcomes than the primary source |
| Zuniga, <i>et al.</i>         | Dietary intervention among breast cancer survivors increased adherence to a Mediterranean-style, anti-inflammatory dietary pattern: the Rx for Better Breast Health Randomized Controlled Trial                                           | Ineligible outcomes                                                                                |

**Supplementary Table S5. Characteristics of included studies**

|                                 |         |                     |               |                                                                   |                  |      |                    | Control group |           |            | Intervention group       |                        |                          | Treatment                                                   |                                                                   |
|---------------------------------|---------|---------------------|---------------|-------------------------------------------------------------------|------------------|------|--------------------|---------------|-----------|------------|--------------------------|------------------------|--------------------------|-------------------------------------------------------------|-------------------------------------------------------------------|
|                                 |         |                     |               |                                                                   |                  |      |                    | Male/Female   |           | %          | Male/Female              |                        | %                        | Intervention group                                          | Control group                                                     |
| Study                           | Country | Design              | Food provided | Population                                                        | Duration (weeks) | n    | n (I/C)            | Mean age (SD) | n         |            |                          | Mean age (SD)          |                          |                                                             |                                                                   |
| Almanza et al. 2018 [27]        | ES      | Parallel RCT        | No            | Metabolically healthy obese women                                 | 12               | 115  | 67/48              | 44.4 (3.3)    | 0/27      | 0.0/ 100.0 | 45.7 (3.5)               | 0/30                   | 0.0/ 100.0               | Education on ↓ energy MD and ↑ PA (≥150 min/ wk of walking) | Advice on cardiometabolic healthy diet and PA                     |
| Álvarez-P érez et al. 2016 [28] | ES      | Parallel RCT        | Yes           | Community dwelling elderly adults with T2D or ≥3 CVD risk factors | 52               | 351  | 117/117            | NR            | 35/82     | 30.2/ 69.8 | NR<br>NR                 | 42/75<br>42/75         | 35.9/ 64.1<br>35.9/ 64.1 | 1. Education on MD and EVOO<br>2. Education on MD and nuts  | Education on LFD                                                  |
| Ambring et al. 2004 [29]        | SE      | Cross-over RCT      | Yes           | Healthy adults                                                    | 4                | 22   | 22/22              | 43.0 (4.7)    | 12/10     | 54.5/ 45.5 | 43.0 (4.7)               | 12/10                  | 54.5/ 45.5               | Education and meals on MD, ≤2 exercise periods/wk           | Education and meals on usual Swedish diet, ≤2 exercise periods/wk |
| Austel et al. 2015 [30]         | DE      | Parallel RCT        | No            | Overweight/ obese adults                                          | 12               | 225  | 100/ 112           | 52.6 (10.9)   | 17/95     | 15.1/ 84.8 | 52.4 (8.9)               | 21/79                  | 21.0/ 79.0               | Education on MD                                             | No treatment (waiting list)                                       |
| Babio et al. 2014 [31]          | ES      | Parallel RCT        | Yes           | Community dwelling elderly adults with T2D or ≥3 CVD risk factors | 250              | 5801 | 1982/ 1885<br>1934 | 67.3 (6.3)    | 777/ 1157 | 40.2/ 59.8 | 67.1 (6.2)<br>66.7 (6.1) | 811/ 1171<br>849/ 1036 | 40.9/ 59.1<br>45.0/ 55.0 | 1. Education on MD and EVOO<br>2. Education on MD and nuts  | Education on LFD                                                  |
| Bajerska et al. 2018 [32]       | PL      | Parallel RCT        | Yes           | Centrally obese postmenopausal women                              | 16               | 144  | 72/72              | 60.5 (NR)     | 0/72      | 0.0/ 100.0 | 60.5 (NR)                | 0/72                   | 0.0/ 100.0               | Education and meals on ↓ energy MD, usual PA                | Education and meals on ↓ energy Central European diet, usual PA   |
| Bemelman s et al. 2000 [33]     | NL      | Parallel RCT        | Yes           | Adults with high cholesterol and ≥2 other CVD risk factors        | 52               | 266  | 103/ 163           | 54.0 (9.0)    | 80/83     | 49.0/ 51.0 | 55.0 (10.0)              | 38/65                  | 37.0/ 63.0               | Education on MD                                             | Usual care (advice on Dutch dietary guidelines)                   |
| Biolato et al. 2019 [35]        | IT      | Cross-over, non-RCT | No            | Non-diabetic adults with NAFLD                                    | 16               | 20   | 20/14              | NR            | NR        | NR         | 42.7 (NR)                | 18/2                   | 90.0/ 10.0               | Education on ↓ energy MD and usual PA                       | Education on ↓ energy LFD and usual PA                            |
| Braakhuis et al. 2017 [36]      | NZ      | Parallel RCT        | Yes           | Survivors of stage 1-3 breast cancer                              | 24               | 50   | 17<br>16           | 55.2 (8.3)    | 0/16      | 0.0/ 100.0 | 54.7 (6.2)               | 0/17                   | 0.0/ 100.0               | Education on MD                                             | Education on LFD                                                  |
| Buscemi et al. 2009 [37]        | IT      | Parallel RCT        | No            | Healthy females with overweight/obesity                           | 8                | 20   | 10/10              | 38.0 (9.5)    | 0/10      | 0.0/ 100.0 | 39.0 (9.5)               | 0/10                   | 0.0/ 100.0               | Education on ↓ energy MD and usual PA                       | Education on ↓ energy, very low CHO diet and usual PA             |
| Carruba 2006 [38]               | IT      | Parallel RCT        | No            | Healthy females                                                   | 24               | 115  | 58/57              | NR            | 0/57      | 0/100.0    | NR                       | 0/58                   | 0.0/ 100.0               | Education on MD                                             | No treatment                                                      |

Supplementary Table S5 (continued)

| Study                                  | Country | Design             | Food provided | Population                                                        | Duration (weeks) | n   | n (I/C)  | Control group    |         | Intervention group |                          |                |                          | Treatment                                                        |                                                               |
|----------------------------------------|---------|--------------------|---------------|-------------------------------------------------------------------|------------------|-----|----------|------------------|---------|--------------------|--------------------------|----------------|--------------------------|------------------------------------------------------------------|---------------------------------------------------------------|
|                                        |         |                    |               |                                                                   |                  |     |          | Male/Female      |         | Male/Female        |                          |                |                          | Intervention group                                               | Control group                                                 |
|                                        |         |                    |               |                                                                   |                  |     |          | Mean age (SD)    | n       | %                  | Mean age (SD)            | n              | %                        |                                                                  |                                                               |
| Casas et al 2016 [39]                  | ES      | Parallel RCT       | Yes           | Community dwelling elderly adults with T2D or ≥3 CVD risk factors | 260              | 165 | 55/55    | 66.3 (6.3)       | 20/33   | 39.0/ 61.0         | 66.7 (6.0)<br>65.8 (5.6) | 23/32<br>31/23 | 43.0/ 57.0<br>57.0/ 43.0 | 1. Education on MD and EVOO<br>2. Education on MD and nuts       | Education on LFD                                              |
| Davis et al. 2017 [40]                 | AU      | Parallel RCT       | Yes           | Adults ≥65 y                                                      | 24               | 166 | 80/72    | 70.8 (4.7)       | 33/39   | 46.0/ 54.0         | 71.0 (4.9)               | 33/47          | 42.0/ 58.0               | Education on MD and usual PA                                     | No treatment and usual PA                                     |
| Davis et al. 2017 [41]                 | AU      | Parallel RCT       | Yes           | Adults ≥65 y                                                      | 24               | 166 | 85/81    | 70.9 (4.9)       | 36/45   | 44.9/ 55.1         | 71.0 (4.9)               | 36/49          | 42.5/ 57.5               | Education on MD and usual PA                                     | No treatment and usual PA                                     |
| de Lorgeril 1994 [42]                  | FR      | Parallel RCT       | Yes           | Survivors of a myocardial infarction                              | 260              | 605 | 302/ 303 | 53.5 (10.0)      | 279/ 24 | 92.1/ 7.9          | 53.5 (10.0)              | 270/32         | 89.4/ 10.6               | Education on MD                                                  | No treatment                                                  |
| Duś-Zuchowska et al. 2018 [43]         | PL      | Parallel RCT       | Yes           | Women with central obesity and ≥1 MetSyn risk factors             | 16               | 144 | 72/72    | 60.8 (4.7)       | 0/72    | 0.0/ 100.0         | 60.3 (4.7)               | 0/72           | 0.0/ 100.0               | Education and meals on ↓ energy MD                               | Education and meals on ↓ energy Central European diet         |
| Elhayany et al. 2010 [44]              | IL      | Parallel RCT       | No            | Overweight patients with T2D                                      | 48               | 259 | 89/85    | 56.0 (6.1)       | 27/28   | 49.1/ 50.9         | 57.4 (6.1)               | 35/28          | 55.5/ 44.5               | Education on MD and advice on ↑ PA (30-45 min ≥3 days/wk)        | ADA dietary guidelines+ advice on ↑ PA (30-45 min ≥3 days/wk) |
| Entwistle et al. 2018 [45]             | UK      | Parallel pilot RCT | No            | Heart and lung transplant recipients                              | 48               | 41  | 21/20    | 59.0 (27.0-65.0) | 14/6    | 70.0/ 30.0         | 58.0 (33.0-65.0)         | 15/6           | 71.0/ 29.0               | Education on MD                                                  | Education on LFD                                              |
| Esposito et al. 2003 [50]              | IT      | Parallel RCT       | No            | Premenopausal obese women                                         | 104              | 120 | 60/60    | 35.0 (5.1)       | 0/60    | 0.0/ 100.0         | 34.2 (4.8)               | 0/60           | 0.0/ 100.0               | Education on ↓ energy MD and advice on ↑ PA                      | Advice on healthy eating and general PA advice                |
| Esposito et al. 2004 [49]              | IT      | Parallel RCT       | No            | Adults with the MetSyn                                            | 104              | 180 | 90/90    | 43.5 (5.9)       | 50/40   | 56.0/ 44.0         | 44.3 (6.4)               | 49/51          | 54.0/ 46.0               | Education on ↓ energy MD and advice on ↑ PA (≥30 min/ day)       | Advice on prudent diet and ↑ PA (≥30 min/ day)                |
| Esposito et al. 2007 [46]              | IT      | Parallel RCT       | No            | Women with the MetSyn                                             | 104              | 59  | 31/28    | 41.5 (3.9)       | 0/28    | 0.0/ 100.0         | 42.3 (4.5)               | 0/31           | 0.0/ 100.0               | Education on ↓ energy (if needed) MD and ↑ PA (≥30 min/ day)     | Advice on healthy eating and ↑ PA (≥30 min/ day)              |
| Esposito et al. 2009 [47] <sup>‡</sup> | IT      | Parallel RCT       | No            | Overweight adults with newly diagnosed T2D                        | 208              | 215 | 108/ 107 | 51.9 (10.7)      | 52/55   | 48.5/ 51.5         | 52.4 (11.2)              | 54/54          | 50.0/ 50.0               | Education on ↓ energy, ↓CHO MD and advice on ↑ PA (≥30 min/ day) | Education on ↓ energy LFD and advice on ↑ PA (≥30 min/ day)   |

Supplementary Table S5 (continued)

| Study                               | Country | Design       | Food provided | Population                                                        | Duration (weeks) | n    | n (I/C)         | Control group     |           |            | Intervention group    |                       |                       | Treatment                                                        |                                                              |
|-------------------------------------|---------|--------------|---------------|-------------------------------------------------------------------|------------------|------|-----------------|-------------------|-----------|------------|-----------------------|-----------------------|-----------------------|------------------------------------------------------------------|--------------------------------------------------------------|
|                                     |         |              |               |                                                                   |                  |      |                 | Male/Female       |           |            | Male/Female           |                       |                       | Intervention group                                               | Control group                                                |
|                                     |         |              |               |                                                                   |                  |      |                 | Mean age (SD)     | n         | %          | Mean age (SD)         | n                     | %                     |                                                                  |                                                              |
| Esposito et al. 2014 [48] ‡         | IT      | Parallel RCT | No            | Overweight adults with newly diagnosed T2D                        | 312              | 215  | 108/ 107        | 51.9 (10.7)       | 52/55     | 48.5/ 51.5 | 52.4 (11.2)           | 54/54                 | 50.0/ 50.0            | Education on ↓ energy, ↓CHO MD and advice on ↑ PA (≥30 min/ day) | Education on ↓ energy LFD and ↑ PA (≥30 min/ day)            |
| Estruch et al. 2006 [52]            | ES      | Parallel RCT | Yes           | Community dwelling elderly adults with T2D or ≥3 CVD risk factors | 12               | 772  | 257/ 258 257    | 69.5 (6.1)        | 109/ 148  | 42.0/ 58.0 | 68.6 (6.9) 68.5 (6.2) | 102/155 128/130       | 40.0/ 60.0 50.0/ 50.0 | 1. Education on MD and EVOO<br>2. Education on MD and nuts       | Education on LFD                                             |
| Estruch et al. 2018 [53]            | ES      | Parallel RCT | Yes           | Community dwelling elderly adults with T2D or ≥3 CVD risk factors | 250              | 7447 | 2543/ 2454 2450 | 67.3 (6.3)        | 987/ 1463 | 40.3/ 59.7 | 67.0 (6.2) 66.7 (6.1) | 1050/ 1493 1128/ 1326 | 41.3/ 58.7 46.0/ 54.0 | 1. Education on MD and EVOO<br>2. Education on MD and nuts       | Education on LFD                                             |
| Estruch et al. 2019 [51]            | ES      | Parallel RCT | Yes           | Community dwelling elderly adults with T2D or ≥3 CVD risk factors | 250              | 7447 | 2543/ 2454 2450 | 67.3 (6.3)        | 987/ 1463 | 40.3/ 59.7 | 67.0 (6.2) 66.7 (6.1) | 1050/ 1493 1128/ 1326 | 41.3/ 58.7 46.0/ 54.0 | 1. Education on MD and EVOO<br>2. Education on MD and nuts       | Education on LFD                                             |
| Fitó et al. 2014 [54]               | ES      | Parallel RCT | Yes           | Community dwelling elderly adults with T2D or ≥3 CVD risk factors | 52               | 930  | 310/ 310 310    | 67.6 (6.1)        | 125/ 186  | 40.2/ 59.8 | 66.4 (5.7) 66.2 (6.0) | 140/170 143/167       | 45.3/ 54.7 46.2/ 53.8 | 1. Education on MD and EVOO<br>2. Education on MD and nuts       | Education on LFD                                             |
| Fortin et al. 2018 [55]             | CA      | Parallel RCT | No            | Adults with T1D and MetSyn                                        | 24               | 28   | 14/14           | 49.8 (11.2)       | 9/5       | 64.0/ 36.0 | 52.1 (9.7)            | 7/7                   | 50.0/ 50.0            | Education on MD and usual PA                                     | Education on LFD and usual PA                                |
| Fraser et al. 2008 [56]             | IL      | Parallel RCT | No            | Obese adults with T2D                                             | 24               | 259  | 85 89           | 57.0 (5.9)        | 40/32     | 55.0/ 45.0 | 55.2 (6.8)            | 32/32                 | 50.0/ 50.0            | Education on MD and advice on ↑ PA (30 min ≥3 days/wk)           | Education on LGI diet and advice on ↑ PA (30 min ≥3 days/wk) |
| Gepner 2018; Gepner 2019 [57, 58] § | IL      | Parallel RCT | Yes           | Sedentary adults with abdominal obesity or dyslipidemia           | 72               | 278  | 73/76           | 49.3 (9.3)        | 64/12     | 84.0/ 16.0 | 47.0 (8.9)            | 62/11                 | 85.0/ 15.0            | Education and meals on ↓ energy, ↓CHO MD                         | Education and meals on ↓ energy LFD                          |
| Hagfors 2003; Sköldstam 2003 [59]   | SE      | Parallel RCT | Yes           | Adults with rheumatoid arthritis                                  | 12               | 51   | 26/25           | 59.0 (35.0-75.0)* | 5/20      | 20.0/ 80.0 | 58.0 (33.0-73.0)*     | 5/21                  | 19.2/ 80.8            | Education and meals on MD                                        | No treatment                                                 |
| Hjerkinn et al. 2006 [60]           | NO      | Parallel RCT | No            | Elderly men with hyperlipidemia                                   | 36               | 563  | 71/68           | NR                | 68/0      | 100.0/0.0  | NR                    | 71/0                  | 100.0/ 0.0            | Education on ↓ energy (if needed) MD                             | No treatment                                                 |

Supplementary Table S5 (continued)

| Study                       | Country                 | Design             | Food provided | Population                                                        | Duration (weeks) | n    | n (I/C)  | Control group                 |          |            | Intervention group            |             |                       | Treatment                                                  |                                                           |
|-----------------------------|-------------------------|--------------------|---------------|-------------------------------------------------------------------|------------------|------|----------|-------------------------------|----------|------------|-------------------------------|-------------|-----------------------|------------------------------------------------------------|-----------------------------------------------------------|
|                             |                         |                    |               |                                                                   |                  |      |          | Males/Females                 |          |            | Males/Females                 |             |                       | Intervention group                                         | Control group                                             |
|                             |                         |                    |               |                                                                   |                  |      |          | Mean age (SD)                 | n        | %          | Mean age (SD)                 | n           | %                     |                                                            |                                                           |
| Jaacks et al. 2018 [61]     | USA                     | Parallel pilot RCT | Yes           | Overweight adults                                                 | 8                | 37   | 11/9     | NR                            | NR       | NR         | NR                            | NR          | NR                    | Education and meals on MD, usual PA                        | No treatment and usual PA                                 |
| Jennings et al. 2019 [62]   | EU (IT, UK, NL, PL, FR) | Parallel RCT       | Yes           | Elderly free-living adults                                        | 52               | 1294 | 561/ 567 | 71.0 (3.9)                    | 260/ 307 | 45.9/54.1  | 70.7 (4.0)                    | 243/ 318    | 43.3/ 56.7            | Education on MD                                            | General dietary guidelines                                |
| Katsagoni 2018 [63]         | GR                      | Parallel RCT       | No            | Adults with NAFLD                                                 | 24               | 42   | 21/21    | 47.0 (42.0-60.0) <sup>†</sup> | 13/8     | 61.9/38.1  | 44.0 (41.0-60.0) <sup>†</sup> | 13/8        | 61.9/ 38.1            | Education on ↓ energy MD                                   | Education on ↓ energy diet and general dietary guidelines |
| Lasa et al. 2014 [64]       | ES                      | Parallel RCT       | Yes           | Community dwelling elderly adults with T2D or ≥3 CVD risk factors | 52               | 191  | 74/50 67 | 67.2 (6.8)                    | 32/35    | 47.8 /52.2 | 67.4 (6.3) 67.1 (4.8)         | 29/45 16/34 | 39.2/ 60.8 32.0/ 68.0 | 1. Education on MD and EVOO<br>2. Education on MD and nuts | Education on LFD                                          |
| Lee et al. 2015 [65]        | AU                      | Cross-over RCT     | No            | Healthy women                                                     | 10 days          | 24   | 24/24    | 25.6 (5.1)                    | 0/24     | 0.0/ 100.0 | 25.6 (5.1)                    | 0/24        | 0.0/ 100.0            | Education on MD                                            | No treatment                                              |
| Maijo et al. 2018 [66]      | UK                      | Parallel RCT       | Yes           | Elderly free-living adults                                        | 52               | 122  | 61/61    | 70.6 (3.8)                    | 23/38    | 37.0/ 63.0 | 70.0 (4.2)                    | 26/35       | 41.8/ 58.2            | Education on MD                                            | General dietary guidelines                                |
| Maiorino et al. 2016 [67]   | IT                      | Parallel RCT       | No            | Adults with diagnosed T2D                                         | 52               | 215  | 108/ 107 | 51.9 (10.7)                   | 52/55    | 48.6/ 51.4 | 52.4 (11.2)                   | 54/54       | 50.0/ 50.0            | Education on MD and advice on ↑ PA                         | Education on LFD and advice on ↑ PA                       |
| Mayr et al. 2018 [69]       | AU                      | Parallel pilot RCT | Yes           | Adults with CHD                                                   | 24               | 65   | 27/29    | 61.8 (9.9)                    | 26/3     | 89.7/ 10.3 | 62.7 (7.7)                    | 21/6        | 77.8/ 22.2            | Education on MD                                            | Education on LFD                                          |
| Mayr et al. 2019 [68]       | AU                      | Parallel pilot RCT | Yes           | Adults with CHD                                                   | 24               | 73   | 34/31    | 61.8 (9.5)                    | 27/4     | 87.1/ 12.9 | 61.8 (9.2)                    | 27/7        | 79.4/ 20.6            | Education on MD                                            | Education on LFD                                          |
| McManus 2001 [70]           | USA                     | Parallel pilot RCT | No            | Overweight adults                                                 | 72               | 101  | 50/51    | 44.0 (10.0)                   | 4/47     | 8.0/ 92.0  | 44.0 (10.0)                   | 6/44        | 12.0/ 88.0            | Education on ↓ energy MD                                   | Education on ↓ energy LFD                                 |
| Meir et al. 2019 [71]       | IL                      | Parallel RCT       | Yes           | Adults with abdominal obesity or dyslipidemia                     | 24               | 294  | 98/98    | 51.1 (10.6)                   | 86/12    | 88.0/ 12.0 | 51.7 (10.4)                   | 86/12       | 88.0/ 12.0            | Education on ↓ energy MD and advice on ↑ PA                | No diet treatment and advice on ↑ PA                      |
| Mezzano et al. 2001 [72]    | CL                      | Parallel RCT       | Yes           | Healthy university students                                       | 4                | 42   | 21/21    | 22.6 (4.5)                    | 21/0     | 100.0/ 0.0 | 21.2 (1.7)                    | 21/0        | 100.0/ 0.0            | MD meals                                                   | Western, HFD meals                                        |
| Michielsen et al. 2019 [73] | NL                      | Parallel RCT       | Yes           | Adults at risk of MetSyn                                          | 8                | 30   | 14/16    | 51.4 (7.8)                    | 8/8      | 50.0/ 50.0 | 57.4 (5.1)                    | 4/10        | 28.6/ 71.4            | Education and meals on MD                                  | Education and meals on high SFA diet                      |

Supplementary Table S5 (continued)

|                                     |         |                |               |                                                                   |                  |      |                 | Control group |           |            | Intervention group    |                       |                       | Treatment                                                                  |                                                                             |
|-------------------------------------|---------|----------------|---------------|-------------------------------------------------------------------|------------------|------|-----------------|---------------|-----------|------------|-----------------------|-----------------------|-----------------------|----------------------------------------------------------------------------|-----------------------------------------------------------------------------|
|                                     |         |                |               |                                                                   |                  |      |                 | Male/Female   |           |            | Male/Female           |                       |                       | Intervention group                                                         | Control group                                                               |
| Study                               | Country | Design         | Food provided | Population                                                        | Duration (weeks) | n    | n (I/C)         | Mean age (SD) | n         | %          | Mean age (SD)         | n                     | %                     |                                                                            |                                                                             |
| Misciagna 2017 [74]                 | IT      | Parallel RCT   | No            | Adults with NAFLD                                                 | 24               | 98   | 50/48           | NR            | 38/10     | 79.2/ 20.8 | NR                    | 34/16                 | 68.0/ 32.0            | Education on LGI MD                                                        | Healthy eating guidelines                                                   |
| Ortner-Hadžiabdić et al. 2016 [75]  | HR      | Parallel RCT   | Yes           | Obese adults                                                      | 52               | 84   | 40/44           | 49.0 (12.1)   | 13/48     | 21.3/ 78.7 | 46.2 (12.7)           | 19/44                 | 30.2/ 69.8            | Education and supervision on ↓ energy MD and advice on ↑ PA (≥30 min/ day) | Education and supervision on ↓ energy LFD and advice on ↑ PA (≥30 min/ day) |
| Osella et al. 2018 [76]             | IT      | Parallel RCT   | No            | Adults with MetSyn                                                | 24               | 163  | 51/55           | 57.5 (10.7)   | 29/26     | 52.7/ 47.3 | 59.4 (10.4)           | 33/18                 | 64.7/ 35.3            | Education on MD and usual PA                                               | Education on LGI diet and usual PA                                          |
| Paniagua et al. 2007 [77]           | ES      | Cross-over RCT | Yes           | Insulin resistant offspring of adults with T2D                    | 4                | 11   | 11 11           | 62.0 (9.4)    | 4/7       | 36.4/ 63.6 | 62.0 (9.4)            | 4/7                   | 36.4/ 63.6            | HFD, enriched in MUFA diet (MD) and usual PA                               | LF, high CHO diet and usual PA                                              |
| Papadaki & Scott 2005 [80]‡         | UK      | Non-RCT        | No            | Healthy females                                                   | 24               | 72   | 53/19           | 40.9 (6.9)    | 0/19      | 0.0/ 100.0 | 40.3 (7.2)            | 0/53                  | 0.0/ 100.0            | Education and tailored feedback on the MD                                  | General healthy eating information and minimally tailored feedback          |
| Papadaki & Scott 2008 [81]‡         | UK      | Non-RCT        | No            | Healthy females                                                   | 36               | 72   | 53/19           | 40.9 (6.9)    | 0/19      | 0.0/ 100.0 | 40.3 (7.2)            | 0/53                  | 0.0/ 100.0            | Education and tailored feedback on the MD                                  | General healthy eating information and minimally tailored feedback          |
| Papadaki et al. 2017; 2019 [78, 79] | ES      | Parallel RCT   | Yes           | Community dwelling elderly adults with T2D or ≥3 CVD risk factors | 353              | 7403 | 2527/ 2444 2432 | 67.3 (6.3)    | 977/ 1455 | 40.2/ 59.8 | 67.0 (6.2) 66.7 (6.1) | 1043/ 1484 1125/ 1319 | 41.3/ 58.7 46.0/ 54.0 | 1. Education on MD and EVOO<br>2. Education on MD and nuts                 | Education on LFD                                                            |
| Papandreou et al. 2012 [82]         | GR      | Parallel RCT   | No            | Obese adults with obstructive sleep apnoea                        | 24               | 40   | 20/20           | 45.8 (14.2)   | 17/3      | 85.0/ 15.0 | 52.5 (10.5)           | 17/3                  | 85.0/ 15.0            | Education on ↓ energy MD and advice on ↑ PA (≥30 min/ day)                 | Education on ↓ energy prudent diet and advice on ↑ PA (≥30 min/ day)        |
| Parcina et al. 2015 [83]            | DE      | Parallel RCT   | Yes           | Healthy males                                                     | 2                | 39   | 14/13           | 29.1 (5.8)    | 13/0      | 100.0/ 0.0 | 31.9 (6.3)            | 14/0                  | 100.0/ 0.0            | MD regime and usual PA                                                     | German cooking style regime and usual PA                                    |
| Properzi et al. 2018 [84]           | AU      | Parallel RCT   | Yes           | Adults with NAFLD                                                 | 12               | 51   | 26/25           | 53.0 (9.1)    | 11/14     | 44.0/56.0  | 51.0 (13.4)           | 15/11                 | 57.7/ 42.3            | Education on MD and usual PA                                               | Education on LFD and usual PA                                               |

Supplementary Table S5 (continued)

|                                             |         |                |               |                                                                               |                  |      |                 | Control group |          | Intervention group |                        |                 |                     | Treatment                                                                                      |                                                                                                        |
|---------------------------------------------|---------|----------------|---------------|-------------------------------------------------------------------------------|------------------|------|-----------------|---------------|----------|--------------------|------------------------|-----------------|---------------------|------------------------------------------------------------------------------------------------|--------------------------------------------------------------------------------------------------------|
|                                             |         |                |               |                                                                               |                  |      |                 | Male/Female   |          | Male/Female        |                        | Male/Female     |                     |                                                                                                |                                                                                                        |
| Study                                       | Country | Design         | Food provided | Population                                                                    | Duration (weeks) | n    | n (I/C)         | Mean age (SD) | n        | %                  | Mean age (SD)          | n               | %                   | Intervention group                                                                             | Control group                                                                                          |
| Richard 2011; Richard et 2013 [85, 86]      | CA      | Non- RCT       | Yes           | Men with MetSyn                                                               | 5                | 26   | 26/26           | 49.4 (11.6)   | 26/0     | 100.0/0.0          | 49.4 (11.6)            | 26/0            | 100.0/0.0           | MD meals and usual PA                                                                          | North American diet meals and usual PA                                                                 |
| Rogerson 2018 [87]                          | UK      | Non-RCT        | Yes           | Sedentary adults                                                              | 4                | 24   | 12/12           | 26.0 (4.3)    | 4/8      | 33.3/66.7          | 25.0 (2.6)             | 2/10            | 16.7/83.3           | Education on MD                                                                                | Education on a vegan diet                                                                              |
| Ryan et al. 2013 [88]                       | AU      | Cross-over RCT | Yes           | Adults with NAFLD but without T2D                                             | 6                | 12   | 12/12           | 55.0 (14.0)   | 6/6      | 50.0/50.0          | 55.0 (14.0)            | 6/6             | 50.0/50.0           | Education and meals on MD, usual PA                                                            | Education and meals on LF, high CHO diet, usual PA                                                     |
| Salas-Salvado et al. 2014 [89]              | ES      | Parallel RCT   | Yes           | Community dwelling elderly adults with T2D or ≥3 CVD risk factors             | 213              | 3541 | 1154/ 1240 1147 | 67.2 (6.1)    | 401/ 746 | 35.0/65.0          | 66.5 (6.0) 66.2 (6.0)  | 439/715 506/734 | 38.0/62.0 40.8/59.2 | 1. Education on MD and EVOO 2. Education on MD and nuts                                        | Education on LFD                                                                                       |
| Sala-Vila et al. 2014 [90]                  | ES      | Parallel RCT   | Yes           | Community dwelling elderly adults with T2D or ≥3 CVD risk factors             | 125              | 164  | 57/46 61        | 66.0 (9.6)    | 23/38    | 38.0/62.0          | 67.0 (6.5) 66.0 (10.1) | 28/29 25/21     | 49.0/51.0 54.0/46.0 | 1. Education on MD and EVOO 2. Education on MD and nuts                                        | Education on LFD                                                                                       |
| Shai et al. 2008; Ben-Avraham 2009 [34, 91] | IL      | Parallel RCT   | No            | Moderately obese adults                                                       | 104              | 322  | 109 104         | 51.0 (7.0)    | 89/15    | 86.0/14.0          | 53.0 (6.0)             | 89/20           | 82.0/18.0           | Education on ↓ energy MD                                                                       | Education on ↓ energy LFD                                                                              |
| Shai et al. 2010 [92]                       | IL      | Parallel RCT   | No            | Moderately obese adults                                                       | 104              | 140  | 55 49           | NR            | NR       | NR                 | NR                     | NR              | NR                  | Education on ↓ energy MD                                                                       | Education on ↓ energy LFD                                                                              |
| Singh et al. 2002 [93]                      | IN      | Parallel RCT   | No            | Patients with angina pectoris, myocardial infarction, or risk factors for CAD | 104              | 1000 | 499/ 501        | 48.0 (9.0)    | NR       | NR                 | 49.0 (10.0)            | NR              | NR                  | Education on Indo-MD and advice on ↑ PA (brisk walking for ≥3-4 km or jogging ≥10-15 min/ day) | Education on the NCEP-1 diet and advice on ↑ PA (brisk walking for ≥3-4 km or jogging ≥10-15 min/ day) |
| Singh et al. 2017 [94]                      | IN      | Parallel RCT   | No            | Patients with acute coronary syndrome                                         | 104              | 406  | 204/ 202        | 52.0 (8.3)    | 185/ 17  | 92.0/ 8.0          | 50.5 (9.3)             | 180/24          | 88.0/12.0           | Education on Indo-MD and advice on regular PA                                                  | Education on the NCEP-1 diet and advice on regular PA                                                  |
| Skouroliakou et al. 2018 [96]               | GR      | Parallel RCT   | No            | Breast cancer survivors                                                       | 24               | 70   | 26/24           | NR            | 0/24     | 0.0/ 100.0         | NR                     | 0/26            | 0.0/ 100.0          | Personalised education on MD and PA cancer guidelines                                          | Updated cancer prevention guidelines and PA cancer guidelines                                          |



Supplementary Table S5 (continued)

|                              |         |                |               |                                                                                          |                  |      |                 | Control group     |           |            | Intervention group    |                       |                       | Treatment                                                                       |                                                                                                 |
|------------------------------|---------|----------------|---------------|------------------------------------------------------------------------------------------|------------------|------|-----------------|-------------------|-----------|------------|-----------------------|-----------------------|-----------------------|---------------------------------------------------------------------------------|-------------------------------------------------------------------------------------------------|
|                              |         |                |               |                                                                                          |                  |      |                 | Male/Female       |           |            | Male/Female           |                       |                       | Intervention group                                                              | Control group                                                                                   |
| Study                        | Country | Design         | Food provided | Population                                                                               | Duration (weeks) | n    | n (I/C)         | Mean age (SD)     | n         | %          | Mean age (SD)         | n                     | %                     |                                                                                 |                                                                                                 |
| Sofi et al. 2018 [97]        | IT      | Cross-over RCT | No            | Clinically healthy omnivorous adults                                                     | 12               | 118  | 58/60           | 49.5 (24.0-70.0)* | 11/49     | 18.3/81.7  | 52.0 (21.0-75.0)*     | 15/43                 | 25.9/74.1             | Education on ↓ energy MD and usual PA                                           | Education on ↓ energy vegetarian diet and usual PA                                              |
| Sola et al. 2011 [98]        | ES      | Parallel RCT   | Yes           | Community dwelling elderly adults with T2D or ≥3 CVD risk factors                        | 12               | 551  | 181/ 193 177    | 69.7 (6.3)        | 72/ 105   | 40.7/ 59.3 | 69.3 (6.2) 68.4 (5.9) | 74/107 97/96          | 40.9/ 59.1 50.3/ 49.7 | 1. Education on MD and EVOO<br>2. Education on MD and nuts                      | Education on LFD                                                                                |
| Stachowska et al. 2006 [99]  | PL      | Parallel RCT   | No            | Kidney transplant patients                                                               | 24               | 37   | 21/16           | 46.0 (9.5)        | 10/6      | 62.5/ 37.5 | 41.0 (12.5)           | 15/6                  | 71.4/ 28.6            | Education on isocaloric MD                                                      | Education on isocaloric LFD                                                                     |
| Storniolo et al. 2017 [100]  | ES      | Parallel RCT   | Yes           | Community dwelling hypertensive women with T2D or ≥3 CVD risk factors                    | 52               | 90   | 30/30 30        | 68.1 (5.2)        | 0/30      | 0.0/10 0.0 | 69.1 (5.5) 68.7 (5.2) | 0/30 0/30             | 0.0/ 100.0 0.0/ 100.0 | 1. Education on MD and EVOO<br>2. Education on MD and nuts                      | Education on LFD                                                                                |
| Thomazella et al. 2011 [101] | BR      | Non-RCT        | Yes           | Males with stable CAD                                                                    | 12               | 40   | 21/19           | 54.6 (5.0)        | 19/0      | 100.0/ 0.0 | 55.0 (4.6)            | 21/0                  | 100.0/ 0.0            | Personalised education on MD and usual PA                                       | Personalised education on the NCEP diet and usual PA                                            |
| Timar et al. 2013 [102]      | RO      | Non-RCT        | No            | Overweight adults with T2D                                                               | 52               | 223  | 68 88           | NR                | 45/43     | 51.1/4 8.9 | NR                    | 32/36                 | 47.1/ 52.9            | Education on energy-controlled MD and advice on ↑ PA (150 min/ wk over ≥3 days) | Education on energy-controll ed standard T2D diet and advice on ↑ PA (150 min/ wk over ≥3 days) |
| Toledo et al. 2013 [103]     | ES      | Parallel RCT   | Yes           | Community dwelling elderly adults with T2D or ≥3 CVD risk factors                        | 208              | 7158 | 2441/ 2367 2350 | 67.3 (6.3)        | 948/ 1402 | 40.3/5 9.7 | 66.9 (6.2) 66.6 (6.1) | 1017/ 1424 1092/ 1275 | 41.7/ 58.3 46.1/ 53.9 | 1. Education on MD and EVOO<br>2. Education on MD and nuts                      | Education on LFD                                                                                |
| Toledo et al. 2015 [104]     | ES      | Parallel RCT   | Yes           | Community dwelling women with T2D or ≥3 CVD risk factors and no history of breast cancer | 250              | 4152 | 1476/ 1285 1391 | 68.1 (6.0)        | 0/ 1391   | 0.0/ 100.0 | 67.6 (5.8) 67.4 (5.6) | 0/1476 0/1285         | 0.0/ 100.0 0.0/ 100.0 | 1. Education on MD and EVOO<br>2. Education on MD and nuts                      | Education on LFD                                                                                |
| Troseid et al. 2009 [105]    | NO      | Parallel RCT   | No            | Elderly men with hyperlipidemia                                                          | 36               | 563  | 281/ 282        | NR                | 282/0     | 100.0/ 0.0 | NR                    | 281/0                 | 100.0/ 0.0            | Education on ↓ energy (if needed) MD                                            | No treatment                                                                                    |

**Supplementary Table S5 (continued)**

|                                                      |         |                |               |                                               |                  |     |         | Control group |       |           | Intervention group |       |           | Treatment                                                     |                                                    |
|------------------------------------------------------|---------|----------------|---------------|-----------------------------------------------|------------------|-----|---------|---------------|-------|-----------|--------------------|-------|-----------|---------------------------------------------------------------|----------------------------------------------------|
|                                                      |         |                |               |                                               |                  |     |         | Male/Female   |       |           | Male/Female        |       |           | Intervention group                                            | Control group                                      |
| Study                                                | Country | Design         | Food provided | Population                                    | Duration (weeks) | n   | n (I/C) | Mean age (SD) | n     | %         | Mean age (SD)      | n     | %         |                                                               |                                                    |
| Tutino et al. 2018 [106]                             | IT      | Parallel RCT   | No            | Adults with NAFLD                             | 12               | 142 | 21/20   | 52.1 (9.5)    | NR    | NR        | 55.5 (10.4)        | NR    | NR        | Education on LGI MD                                           | Healthy eating guidelines                          |
| Vincent-Baudry et al. 2005; Vincent 2004 [107, 111]§ | FR      | Parallel RCT   | Yes           | Adults at moderate CVD risk                   | 12               | 212 | 88/81   | 51.6 (10.3)   | NR    | NR        | 50.8 (10.8)        | NR    | NR        | Education on MD and usual PA                                  | Education on ↓ energy (if needed) LFD and usual PA |
| Wade et al. 2018 [108]                               | AU      | Cross-over RCT | Yes           | Adults at CVD risk                            | 8                | 41  | 20/21   | 59.6 (7.6)    | 7/14  | 33.3/66.7 | 60.8 (6.3)         | 6/14  | 30.0/70.0 | Education on MD supplemented with dairy products and usual PA | Education on LFD and usual PA                      |
| Wade et al. 2019 [109]                               | AU      | Cross-over RCT | Yes           | Adults at CVD risk                            | 8                | 33  | 33/33   | 61.6 (5.7)    | 4/14  | 22.2/77.8 | 60.2 (8.7)         | 6/9   | 40.0/60.0 | Education on MD supplemented with lean pork and usual PA      | Education on LFD and usual PA                      |
| Wardle et al. 2000 [110]                             | UK      | Parallel RCT   | Yes           | Adults with elevated serum cholesterol levels | 12               | 176 | 61/59   | 52.0 (11.0)   | 34/25 | 58.0/42.0 | 54.0 (11.0)        | 27/34 | 44.0/56.0 | Education on MD                                               | Education on LFD                                   |

ADA, American Diabetes Association; AU, Australia; BMI, body mass index; BR, Brazil; C, control; CA, Canada; CAD, coronary artery disease; CHD, coronary heart disease; CHO, carbohydrates; CL, Chile; CVD, cardiovascular disease; DE, Germany; ES, Spain; EVOO, extra-virgin olive oil; FR, France; FU, follow-up; GR, Greece; HF, heart failure; HFD, high-fat diet; HR, Croatia; I, intervention; IL, Israel; IN, India; IT, Italy; LFD, low-fat diet; LGI, low glycemic index; MD, Mediterranean Diet; MetSyn, metabolic syndrome; MUFA, monounsaturated fatty acids; NAFLD, non-alcoholic fatty liver disease; NCEP-1, National Cholesterol Education Programme stage 1; NL, Netherlands; NO, Norway; NR, not reported; NZ, New Zealand; PA, Physical Activity; PL, Poland; RCT, randomised controlled trial; RO, Romania; SD, standard deviation; SE, Sweden; SFA, saturated fatty acids; T1D, type 1 diabetes; T2D, type 2 diabetes; UK, United Kingdom; USA, United States of America.

\*Mean (range) reported. †Median (interquartile range) reported. ‡Four papers reported separately on the post-intervention [47, 80], and extended follow-up [48, 81] of the same trials. All these papers were included independently in the qualitative synthesis but only the papers reporting on the post-intervention results [47, 80] were included in the pooled analysis. §Two trials reported the study characteristics in two separate publications [57, 58, 107, 111], which were merged for the purposes of this review.

**Supplementary Table S6. Foods provided to the intervention group, for papers reporting on studies that supplemented the dietary advice intervention with foods**

| Study                          | Food provision                                                                                                                                                                                                                                                          |
|--------------------------------|-------------------------------------------------------------------------------------------------------------------------------------------------------------------------------------------------------------------------------------------------------------------------|
| Alvarez-Pérez et al. 2016 [28] | Intervention group 1: Free provision of EVOO (1 L/wk)<br>Intervention group 2: Free provision of nuts [sachets of walnuts (15 g/d), hazelnuts (7.5 g/d), and almonds (7.5 g/d)]                                                                                         |
|                                | Aim of food provision was to improve adherence to the intervention; no energy restriction was suggested and participants were advised on the desired frequency of intake of specific foods.                                                                             |
| Ambring et al. 2004 [29]       | Participants were provided with 60% of their daily caloric needs, including one cooked meal/day, and sterol esters (2 g/day) as an ingredient in a margarine.                                                                                                           |
|                                | Low-fat products were chosen by the subjects themselves for the remaining daily energy intake (40%).                                                                                                                                                                    |
| Babio et al. 2014 [31]         | Intervention group 1: Free provision of EVOO (1 L/wk)<br>Intervention group 2: Free provision of nuts [sachets of walnuts (15 g/d), hazelnuts (7.5 g/d), and almonds (7.5 g/d)]                                                                                         |
|                                | Aim of food provision was to improve adherence to the intervention; no energy restriction was suggested and participants were advised on the desired frequency of intake of specific foods.                                                                             |
| Bajerska et al. 2018 [32]      | Participants were provided with packaged main meals (covering ~35% of their daily energy needs).                                                                                                                                                                        |
|                                | Aim of food provision was to optimise control for energy and macronutrient intake. Participants were advised on how to prepare remaining meals at home.                                                                                                                 |
| Bemelmans et al. 2000 [33]     | Participants were provided with a polyunsaturated fatty acid-rich margarine.                                                                                                                                                                                            |
|                                | No energy restriction was suggested and participants were advised on the desired frequency of intake of specific foods.                                                                                                                                                 |
| Braakhuis et al. 2017 [36]     | Participants were provided with olive leaf extract.                                                                                                                                                                                                                     |
|                                | No energy restriction was suggested.                                                                                                                                                                                                                                    |
| Casas et al 2016 [39]          | Intervention group 1: Free provision of EVOO (1 L/wk)<br>Intervention group 2: Free provision of nuts [sachets of walnuts (15 g/d), hazelnuts (7.5 g/d), and almonds (7.5 g/d)]                                                                                         |
|                                | Aim of food provision was to improve adherence to the intervention; no energy restriction was suggested and participants were advised on the desired frequency of intake of specific foods.                                                                             |
| Davis et al. 2017 [40]         | Participants were provided with all of the recommended EVOO, nuts (50% walnuts, 25% almonds and hazelnuts), Greek yogurt, and canned legumes. Canned tuna was given to provide 30% of the fish requirements.                                                            |
|                                | Aim of food provision was to improve adherence; participants were advised on the desired frequency of intake of specific foods.                                                                                                                                         |
| Davis et al. 2017 [41]         | Participants were provided with all of the recommended EVOO, nuts (50% walnuts, 25% almonds and hazelnuts), Greek yogurt, and canned legumes. Canned tuna was given to provide 30% of the fish requirements.                                                            |
|                                | Aim of food provision was to improve adherence; participants were advised on the desired frequency of intake of specific foods.                                                                                                                                         |
| de Lorgeril et al. 1994 [42]   | Participants were provided with canola oil-based margarine, high in n-3 fatty acids, to replace butter and cream.                                                                                                                                                       |
|                                | Aim of food provision was to improve the MD's acceptability (as participants might not accept olive oil as the only source of fat in the diet). Participants were advised on the desired frequency of intake of specific foods.                                         |
| Duś-Żuchowska et al. 2018 [43] | Participants were provided with pre-portioned main meals (covering ~35% of their daily caloric needs) for the whole period of the study.                                                                                                                                |
|                                | Aim of food provision was to According to reduce the overall number of food items at home and decrease high-fat food choices (by using a home-delivery service). Energy restriction was suggested. Participants were advised on how to prepare remaining meals at home. |
| Estruch et al. 2006 [52]       | Intervention group 1: Free provision of EVOO (1 L/wk)<br>Intervention group 2: Free provision of nuts [sachets of walnuts (15 g/d), hazelnuts (7.5 g/d), and almonds (7.5 g/d)]                                                                                         |
|                                | Aim of food provision was to improve adherence to the intervention; no energy restriction was suggested and participants were advised on the desired frequency of intake of specific foods.                                                                             |

|                                                     |                                                                                                                                                                                                                                                                                                                                                                                                                                                                                    |
|-----------------------------------------------------|------------------------------------------------------------------------------------------------------------------------------------------------------------------------------------------------------------------------------------------------------------------------------------------------------------------------------------------------------------------------------------------------------------------------------------------------------------------------------------|
| Estruch et al. 2018 [53]                            | <p>Intervention group 1: Free provision of EVOO (1 L/wk)</p> <p>Intervention group 2: Free provision of nuts [sachets of walnuts (15 g/d), hazelnuts (7.5 g/d), and almonds (7.5 g/d)]</p> <p>Aim of food provision was to improve adherence to the intervention; no energy restriction was suggested and participants were advised on the desired frequency of intake of specific foods.</p>                                                                                      |
| Estruch et al. 2019 [51]                            | <p>Intervention group 1: Free provision of EVOO (1 L/wk)</p> <p>Intervention group 2: Free provision of nuts [sachets of walnuts (15 g/d), hazelnuts (7.5 g/d), and almonds (7.5 g/d)]</p> <p>Aim of food provision was to improve adherence to the intervention; no energy restriction was suggested and participants were advised on the desired frequency of intake of specific foods.</p>                                                                                      |
| Fitó et al. 2014 [54]                               | <p>Intervention group 1: Free provision of EVOO (1 L/wk)</p> <p>Intervention group 2: Free provision of nuts [sachets of walnuts (15 g/d), hazelnuts (7.5 g/d), and almonds (7.5 g/d)]</p> <p>Aim of food provision was to improve adherence to the intervention; no energy restriction was suggested and participants were advised on the desired frequency of intake of specific foods.</p>                                                                                      |
| Gepner et al. 2018; Gepner et al. 2019 [57, 58]     | <p>Participants were provided with walnuts (28 g/d, starting from the third month). Lunch was provided on site.</p>                                                                                                                                                                                                                                                                                                                                                                |
| Hagfors et al. 2003; Sköldstam et al. 2003 [59, 95] | <p>Participants were provided with lunch and dinner (for the first three weeks) and with frozen vegetables, tea, olive oil, canola oil and liquid and half-fat margarines based on canola oil (for the remaining of the study).</p> <p>Aim of food provision was to promote compliance; participants were advised on how to prepare meals at home.</p>                                                                                                                             |
| Jaacks et al. 2018 [61]                             | <p>Participants were provided with three meals with beverages and two snacks per day (for half the study's duration).</p> <p>Aim of food provision was to provide daily energy intake for weight maintenance. Participants were provided with information on the MD's composition</p>                                                                                                                                                                                              |
| Jennings et al. 2019 [62]                           | <p>Participants were provided with commercially available foods, including whole-grain pasta, olive oil, high-MUFA and high-PUFA margarine, and low-fat, low-salt cheese in all centers and frozen vegetable soup (in Italy only).</p> <p>Aim of food provision was to facilitate dietary compliance and help meet dietary guidelines. No energy restriction was suggested and participants were advised on the desired frequency of intake of specific foods.</p>                 |
| Lasa et al. 2014 [64]                               | <p>Intervention group 1: Free provision of EVOO (1 L/wk)</p> <p>Intervention group 2: Free provision of nuts [sachets of walnuts (15 g/d), hazelnuts (7.5 g/d), and almonds (7.5 g/d)]</p> <p>Aim of food provision was to improve adherence to the intervention; no energy restriction was suggested and participants were advised on the desired frequency of intake of specific foods.</p>                                                                                      |
| Maijo et al. 2018 [66]                              | <p>Participants were provided with commercially available foods, including whole-grain pasta, olive oil, high-MUFA and high-PUFA margarine, and low-fat, low-salt cheese in all centers and frozen vegetable soup (in Italy only).</p> <p>Aim of food provision was to facilitate dietary compliance and help meet dietary guidelines. No energy restriction was suggested and participants were advised on the desired frequency of intake of specific foods.</p>                 |
| Mayr et al. 2018 [69]                               | <p>Participants were provided with EVOO (60-80 mL/d), nuts (almonds, walnuts and hazelnuts, 30 g/d) and samples of tinned tuna and salmon, canned legumes and Greek yoghurt.</p> <p>Aim of food provision was to facilitate dietary compliance and encourage intake of staple Mediterranean foods that participants might not have been familiar with. No energy restriction was suggested and participants were advised on the desired frequency of intake of specific foods.</p> |
| Mayr et al. 2019 [68]                               | <p>Participants were provided with EVOO (60-80 mL/d), nuts (almonds, walnuts and hazelnuts, 30 g/d) and samples of tinned tuna and salmon, canned legumes and Greek yoghurt.</p> <p>Aim of food provision was to facilitate dietary compliance and encourage intake of staple Mediterranean foods that participants might not have been familiar with. No energy restriction was suggested and participants were advised on the desired frequency of intake of specific foods.</p> |
| Meir et al. 2019 [71]                               | <p>Participants were provided with walnuts (28 g/d).</p> <p>Energy restriction was suggested and participants were advised on the desired frequency of intake of specific foods.</p>                                                                                                                                                                                                                                                                                               |
| Mezzano et al. 2001 [72]                            | <p>Participants were provided with personalised boxes of lunch and dinner (specific indications for breakfast and snacks were provided).</p> <p>Aim of food provision was to optimise control for energy and macronutrient intake.</p>                                                                                                                                                                                                                                             |

|                                                   |                                                                                                                                                                                                                                                                                                                                                                                   |
|---------------------------------------------------|-----------------------------------------------------------------------------------------------------------------------------------------------------------------------------------------------------------------------------------------------------------------------------------------------------------------------------------------------------------------------------------|
| Michielsen et al. 2019 [73]                       | Participants were provided with 90% of their energy needs (no details provided).                                                                                                                                                                                                                                                                                                  |
| Ortner- Hadžiabdić et al. 2016 [75]               | Participants were provided with EVOO. Breakfast and lunch were consumed each day on site, which served as an educational measure for the amount and type of food participants should consume at home.                                                                                                                                                                             |
|                                                   | Energy restriction was suggested and participants were advised on the desired frequency of intake of specific foods.                                                                                                                                                                                                                                                              |
| Paniagua et al. 2007 [77]                         | Participants were provided with breakfast comprised of 200 ml skim milk, 50 g bread and 27 g olive oil.                                                                                                                                                                                                                                                                           |
| Papadaki et al. 2017; 2019 [78, 79]               | Intervention group 1: Free provision of EVOO (1 L/wk)<br>Intervention group 2: Free provision of nuts [sachets of walnuts (15 g/d), hazelnuts (7.5 g/d), and almonds (7.5 g/d)<br><br>Aim of food provision was to improve adherence to the intervention; no energy restriction was suggested and participants were advised on the desired frequency of intake of specific foods. |
| Parcina et al. 2015 [83]                          | Participants were provided, on each day, with three freshly prepared meals from high quality foods.<br><br>Aim of food provision was to assure compliance (only calorie-free drinks were allowed outside these meals).                                                                                                                                                            |
| Properzi et al. 2018 [84]                         | Participants were provided, at each 4-weekly visit, with 750 g of nuts (almonds or walnuts) and 750 mL of olive oil.<br><br>Aim of the food provision was to minimise financial disadvantage to participants consuming core foods in the MD. Participants were advised on the desired frequency of intake of specific foods.                                                      |
| Richard et al. 2011; Richard et al. 2013 [85, 86] | Participants were provided with all meals, foods and beverages (including alcohol).<br><br>Aim of food provision was to optimise control for energy and macronutrient intake.                                                                                                                                                                                                     |
| Rogerson et al. 2018 [87]                         | Participants were provided with food items to assist adherence (no details provided).<br><br>Participants were advised on the desired frequency of intake of specific foods. No energy restriction was suggested.                                                                                                                                                                 |
| Ryan et al. 2013 [88]                             | Participants were provided with the majority of foods (70%) on the intervention diet for free: olives, dried fruit, nuts, Greek yoghurt, fish, and EVOO.<br><br>To facilitate compliance, participants were provided with precooked meals. No energy restriction was suggested and participants were advised to records their intake and discard leftovers.                       |
| Salas-Salvado et al. 2014 [89]                    | Intervention group 1: Free provision of EVOO (1 L/wk)<br>Intervention group 2: Free provision of nuts [sachets of walnuts (15 g/d), hazelnuts (7.5 g/d), and almonds (7.5 g/d)<br><br>Aim of food provision was to improve adherence to the intervention; no energy restriction was suggested and participants were advised on the desired frequency of intake of specific foods. |
| Sala-Vila et al. 2014 [90]                        | Intervention group 1: Free provision of EVOO (1 L/wk)<br>Intervention group 2: Free provision of nuts [sachets of walnuts (15 g/d), hazelnuts (7.5 g/d), and almonds (7.5 g/d)<br><br>Aim of food provision was to improve adherence to the intervention; no energy restriction was suggested and participants were advised on the desired frequency of intake of specific foods. |
| Sola et al. 2011 [98]                             | Intervention group 1: Free provision of EVOO (1 L/wk)<br>Intervention group 2: Free provision of nuts [sachets of walnuts (15 g/d), hazelnuts (7.5 g/d), and almonds (7.5 g/d)<br><br>Aim of food provision was to improve adherence to the intervention; no energy restriction was suggested and participants were advised on the desired frequency of intake of specific foods. |
| Storniolo et al. 2017 [100]                       | Intervention group 1: Free provision of EVOO (1 L/wk)<br>Intervention group 2: Free provision of nuts [sachets of walnuts (15 g/d), hazelnuts (7.5 g/d), and almonds (7.5 g/d)<br><br>Aim of food provision was to improve adherence to the intervention; no energy restriction was suggested and participants were advised on the desired frequency of intake of specific foods. |
| Thomazella et al. 2011 [101]                      | Participants were provided with mixed plain nuts (Brazil nuts, almonds, and walnuts, 10 g/day), cabernet sauvignon wine (250 ml/day), and EVOO (15 ml, amber flasks).<br><br>Aim of food provision was to improve adherence. Participants were advised on the desired frequency of intake of specific foods.                                                                      |
| Toledo et al. 2013 [103]                          | Intervention group 1: Free provision of EVOO (1 L/wk)<br>Intervention group 2: Free provision of nuts [sachets of walnuts (15 g/d), hazelnuts (7.5 g/d), and almonds (7.5 g/d)<br><br>Aim of food provision was to improve adherence to the intervention; no energy restriction was suggested and participants were advised on the desired frequency of intake of specific        |

|                                                                                                                             |                                                                                                                                                                                                                                                                                                                                                                                                                                                                     |
|-----------------------------------------------------------------------------------------------------------------------------|---------------------------------------------------------------------------------------------------------------------------------------------------------------------------------------------------------------------------------------------------------------------------------------------------------------------------------------------------------------------------------------------------------------------------------------------------------------------|
|                                                                                                                             | foods.                                                                                                                                                                                                                                                                                                                                                                                                                                                              |
| Toledo et al. 2015 [104]                                                                                                    | Intervention group 1: Free provision of EVOO (1 L/wk)<br>Intervention group 2: Free provision of nuts [sachets of walnuts (15 g/d), hazelnuts (7.5 g/d), and almonds (7.5 g/d)<br><br>Aim of food provision was to improve adherence to the intervention; no energy restriction was suggested and participants were advised on the desired frequency of intake of specific foods.                                                                                   |
| Vincent-Baudry et al. 2005;<br>Vincent et al. 2004 [107, 111]                                                               | Participants were provided with tomato paste, olive oil and soluble fibre-enriched pasta.<br><br>Participants were advised on the desired frequency of intake of specific foods.                                                                                                                                                                                                                                                                                    |
| Wade et al. 2018 [108]                                                                                                      | Participants were provided with Greek yogurt, almonds, walnuts and hazelnuts, EVOO, regular-fat and reduced-fat cheese slices, chickpeas, cannellini beans, red kidney beans, 4-bean mix, and lentils, and canned tuna and salmon.<br><br>Aim of food provision was to assist with dietary adherence. Participants were advised on the desired frequency of intake of specific foods.                                                                               |
| Wade et al. 2019 [109]                                                                                                      | Participants were provided each week with 375mL EVOO, 250g of fresh, lean pork, 150g raw, unsalted almonds, walnuts and hazelnuts; 225g (net weight) of canned chickpeas, red kidney beans, 4-bean mix and lentils; 95g of canned tuna and 95g of canned salmon.<br><br>Aim of food provision was to improve adherence to the intervention; no energy restriction was suggested and participants were advised on the desired frequency of intake of specific foods. |
| Wardle et al. 2000 [110]                                                                                                    | Participants were provided with free-spreading fats and oils that were high in monounsaturated fat.<br><br>Aim of food provision was to encourage compliance; participants were advised to substitute predominantly monounsaturated fats for saturated fats.                                                                                                                                                                                                        |
| EVOO, extra-virgin olive oil; MD, Mediterranean Diet; MUFA, monounsaturated fatty acids; PUFA, polyunsaturated fatty acids. |                                                                                                                                                                                                                                                                                                                                                                                                                                                                     |

**Supplementary Table S7.** Summary of the findings on anthropometric and blood pressure markers (between-group differences) from the papers not included in the pooled analysis

|                                  | Body weight                                                   | Body mass index                             | Waist circumference   | Systolic blood pressure                                                                                               | Diastolic blood pressure                                                                                                 |
|----------------------------------|---------------------------------------------------------------|---------------------------------------------|-----------------------|-----------------------------------------------------------------------------------------------------------------------|--------------------------------------------------------------------------------------------------------------------------|
| Carruba et al. 2006 [38]         | -1.3 vs. -0.6 kg (level of strength of evidence not reported) | -                                           | -                     | -                                                                                                                     | -                                                                                                                        |
| Esposito et al. 2014 [48]        | +0.4 kg [CI -0.1 to 0.7]                                      | -                                           | -                     | -1.8 mm Hg [95% CI -4.5, 1.0]                                                                                         | -1.5 mm Hg [95% CI -4 to 1.9]                                                                                            |
| Katsagoni et al. 2018 [63]       | -2.7 kg [CI -6.1 to 0.68]                                     | -0.95 kg/m <sup>2</sup> [CI -0.92 to -0.99] | -                     | -                                                                                                                     | -                                                                                                                        |
| Toledo et al. 2013 [103]         | -                                                             | -                                           | -                     | MD (EVOO) vs. CG: 0.39 mm Hg [CI -0.48 to 1.26]; P=0.380<br>MD (nuts) vs. CG: -0.72 mm Hg [CI -1.58 to 0.13]; P=0.100 | MD (EVOO) vs. CG: -1.53 mm Hg [CI -2.01 to -1.04]; P<0.001<br>MD (nuts) vs. CG: -0.65 mm Hg [CI -1.15 to -0.15]; P=0.010 |
| Troscid et al. 2009 [105]        | -                                                             | -0.3 vs. 0.1 kg/m <sup>2</sup> , P=0.021    | +1 vs. +3 cm, P=0.061 | -                                                                                                                     | -                                                                                                                        |
| Vincent-Baudry et al. 2005 [107] | -1.5 vs. -1.2 kg (level of strength of evidence not reported) | -                                           | -                     | -                                                                                                                     | -                                                                                                                        |

CG, control group; CI, confidence intervals; EVOO, extra virgin olive oil; MD, Mediterranean diet.

**Summary of findings:** The MD, as compared to a control condition, showed a protective effect for body weight in 0/4 papers, for body mass index in 2/2 papers, for waist circumference in 0/1 paper, for systolic blood pressure in 0/3 comparisons and for diastolic blood pressure in 2/3 comparisons.

**Supplementary Table S8.** Summary of the findings on biochemical and markers of insulin resistance (between-group differences) from the papers (and/or outcomes) not included in the pooled analysis

|                                  | Glucose                                   | Insulin                       | HOMA-IR                         | HbA1c                                                                                                                 | TC                                                                                                                   | LDL                                      | HDL                                    |
|----------------------------------|-------------------------------------------|-------------------------------|---------------------------------|-----------------------------------------------------------------------------------------------------------------------|----------------------------------------------------------------------------------------------------------------------|------------------------------------------|----------------------------------------|
| Austel et al. 2015 [30]          | 0.17 vs. -0.90 mg/dL, P>0.005             | -                             | -                               | -                                                                                                                     | -12.6 vs. 0.8 mg/dL, P<0.001                                                                                         | -7.18 vs. 1.14 mg/dL, P<0.001            | -1.85 vs. 0.02 mg/dL, P>0.050          |
| Casas et al. 2016 [39]           | -                                         | -                             | -                               | MD (EVOO) vs. CG: -0.4 mg/dL [CI -0.95 to 0.15]; P=0.159<br>MD (nuts) vs. CG: -0.30 mg/dL [CI -0.85 to 0.25]; P=0.290 | -                                                                                                                    | -                                        | -                                      |
| Esposito et al. 2014 [48]        | -10 mg/dL [CI -25 to 5]                   | -                             | -                               | -                                                                                                                     | -4 mg/dL [CI -10 to 2]                                                                                               | -                                        | +4.7 mg/dL [CI 0.2 to 9.1]             |
| Gepner et al. 2018 [58]          | -                                         | -                             | -                               | -0.04% [CI -0.17 to 0.09]; P=0.532                                                                                    | -                                                                                                                    | -                                        | -                                      |
| Katsagoni et al. 2018 [63]       | -                                         | -1 pmol/L [CI -0.7 to 1.4]    | -1.1 [CI -0.74 to 1.5]          | -                                                                                                                     | -                                                                                                                    | -                                        | 1.1 mmol/L [CI -0.9 to 1.2]            |
| Papadaki & Scott 2008 [81]       | -                                         | -                             | -                               | -                                                                                                                     | 0.17 mmol/L [CI 0.02 to 0.32]; P=0.010                                                                               | -0.05 mmol/L [CI -0.23 to 0.13]; P=0.450 | 0.20 mmol/L [CI 0.13 to 0.27]; P<0.001 |
| Parcina et al. 2015 [83]         | -                                         | -                             | -                               | -0.02% [CI -0.08 to 0.04]; P=0.548                                                                                    | -                                                                                                                    | -                                        | -                                      |
| Properzi et al. 2018 [84]        | -                                         | -                             | -                               | 0.00 [CI -0.14 to 0.14]; P=1.000                                                                                      | -                                                                                                                    | -                                        | -                                      |
| Sofi et al. 2018 [97]            | -                                         | -                             | 0.0 [CI -0.06 to 0.06]; P=1.000 | -                                                                                                                     | -                                                                                                                    | -                                        | -                                      |
|                                  | TG                                        | non-HDL                       |                                 | TC:HDL                                                                                                                | ApoB                                                                                                                 | ALT                                      | GGT                                    |
| Austel et al. 2015 [30]          | -14.76 vs. 12.54mg/dL, P<0.010            | -                             |                                 | -                                                                                                                     | -                                                                                                                    | -                                        | -                                      |
| de Lorgeril et al. 1994 [42]     | -                                         | -                             |                                 | -                                                                                                                     | -1 g/L [CI -1.57 to -0.43]; P=0.001                                                                                  | -                                        | -                                      |
| Entwistle et al. 2018 [45]       | -9% [CI -20 to 4] vs. -21% [CI -33 to -7] | -                             |                                 | -                                                                                                                     | -                                                                                                                    | -                                        | -                                      |
| Esposito et al. 2014 [48]        | -12 mg/dL [CI -30 to 6]                   | -                             |                                 | -                                                                                                                     | -                                                                                                                    | -                                        | -                                      |
| Fortin et al. 2018 [55]          | -                                         | -                             |                                 | -                                                                                                                     | -0.14 g/L [CI -0.27 to -0.01]; P=0.04                                                                                | -                                        | -                                      |
| Katsagoni et al. 2018 [63]       | -                                         | -1.5 mmol/L [CI -2.2 to -1.0] |                                 | -                                                                                                                     | -                                                                                                                    | -0.79 UI/L [CI -0.57 to 1.1]             | -0.79 UI/L [CI -0.54 to 1.15]          |
| Michielsen et al. 2019 [73]      | -                                         | -                             |                                 | -                                                                                                                     | -0.14 g/L [CI -0.22 to -0.06]; P=0.002                                                                               | -                                        | -                                      |
| Papadaki & Scott. 2005 [80]      | -                                         | -                             |                                 | -0.33 [CI -0.53 to -0.14]; P<0.001                                                                                    | -                                                                                                                    | -                                        | -                                      |
| Papadaki & Scott. 2008 [81]      | 0.08 mmol/L [CI -0.01 to 0.17]; P=0.027   | -                             |                                 | -0.33 [CI -0.53 to -0.13]; P<0.001                                                                                    | -                                                                                                                    | -                                        | -                                      |
| Shai et al. 2010 [92]            | -                                         | -                             |                                 | -                                                                                                                     | MD vs. LCHO: 0.03 g/L [CI 0.01 to 0.05]; P=0.02<br>MD vs. LFD: -0.01 g/L [CI -0.03 to 0.01]; P=0.260                 | -                                        | -                                      |
| Sola et al. 2011 [98]            | -                                         | -                             |                                 | -                                                                                                                     | MD (EVOO) vs. CG: -0.03 g/L [CI -0.06 to -0.002]; P=0.039<br>MD (nuts) vs. CG: -0.02 g/L [CI -0.05 to 0.01]; P=0.208 | -                                        | -                                      |
| Thomazella et al. 2011 [101]     | -                                         | -                             |                                 | -                                                                                                                     | 0.10 g/L [CI 0.06 to 0.14]; P<0.001                                                                                  | -                                        | -                                      |
| Troscid et al. 2009 [105]        | -0.4 vs. -0.2 mmol/L; P<0.001             | -                             |                                 | -                                                                                                                     | -                                                                                                                    | -                                        | -                                      |
| Vincent-Baudry et al. 2005 [107] | -                                         | -                             |                                 | -                                                                                                                     | -0.01 g/L [CI -0.02 to 0.00]; P=0.106                                                                                | -                                        | -                                      |
| Wade et al. 2019 [109]           | -                                         | -                             |                                 | -0.05 [CI -0.16 to 0.06]; P=0.380                                                                                     | -                                                                                                                    | -                                        | -                                      |

ALT, alanine aminotransferase; ApoB, apolipoprotein B; CG, control group; CI, confidence intervals; EVOO, extra virgin olive oil; GGT, gamma glutamyl transferase; HbA1c, glycosylated heamoglobin; HDL, high density lipoprotein; HOMA-IR, homeostatic model assessment of insulin resistance; LCHO, low carbohydrate diet; LFD, low-fat diet; MD, Mediterranean diet; LDL, low density lipoprotein; TC, total cholesterol; TG, triglycerides.

Triglyceride concentrations were transformed from mmol/L to mg/dL by multiplying with 88.57; Total, HDL- and LDL- cholesterol concentrations were transformed from mmol/L to mg/dL by multiplying with 38.67; Insulin concentrations were transformed from pmol/L to  $\mu$ U/mL by multiplying with 0.144; Glucose concentrations were transformed from mmol/L to mg/dL by multiplying with 18 (<https://www.ncbi.nlm.nih.gov/books/NBK83505/>; <http://www.endmemo.com/medical/unitconvert/Insulin.php>; <https://www.diabetes.co.uk/blood-sugar-converter.html>).



**Summary of findings:** The MD, as compared to a control condition, showed a protective effect for glucose in 0/2 papers, for insulin in 0/1 paper, for HOMA-IR index in 0/2 papers, for HbA1c in 0/5 comparisons, for total cholesterol in 1/3 papers, for LDL-cholesterol in 1/2 papers, for HDL-cholesterol in 2/4 papers, for triglycerides in 2/5 papers, for non-HDL-cholesterol in 1/1 paper, for total:HDL-cholesterol ratio in 2/3 papers, for apolipoprotein B in 4/9 comparisons, for alanine aminotransferase in 0/1 paper and for gamma glutamyl transferase in 0/1 paper.

**Supplementary Table S9.** Summary of the findings on oxidative stress, inflammatory and endothelial function markers (between-group differences) from the papers (and/or outcomes) not included in the pooled analysis

|                                    | TAC                                                                                                                              | CRP                                      | IL-6                                        | Adiponectin                                    | TNF-a                           | IMT                                                       |
|------------------------------------|----------------------------------------------------------------------------------------------------------------------------------|------------------------------------------|---------------------------------------------|------------------------------------------------|---------------------------------|-----------------------------------------------------------|
| Esposito et al. 2003 [50]          | -                                                                                                                                | -0.8 mg/L [CI -2.0 to -0.04];<br>P=0.008 | -1.1 pg/mL [CI -1.7 to -0.6];<br>P=0.009    | -                                              | -                               | -                                                         |
| Esposito et al. 2004 [49]          | -                                                                                                                                | -1 mg/L [CI -1.7 to -0.3];<br>P=0.010    | -0.6 pg/mL [CI -1.1 to -0.1];<br>P=0.040    | -                                              | -                               | -                                                         |
| Hjerkinn et al. 2006 [60]          | -                                                                                                                                | -                                        | -                                           | -                                              | -                               | -0.03 mm [CI -0.05 to -0.005];<br>P=0.017                 |
| Maiorino et al. 2016 [67]          | -                                                                                                                                | -0.8mg/L [CI -1.3 to -0.3];<br>P=0.010   | -                                           | 1.9 µg/mL [CI<br>0.8 to 3.0]; P=0.001          | -                               | -                                                         |
| Mayr et al. 2019 [68]              | -                                                                                                                                | -                                        | -                                           | 0.0019 µg/mL [CI 0.0014 to<br>0.0024]; P<0.001 | -                               | -                                                         |
| Ortner Hadžiabdić et al. 2016 [75] | 0.15 mmol Trolox [CI 0.11 to<br>0.19]; P<0.001                                                                                   | -                                        | -                                           | -                                              | -                               | -                                                         |
| Richard et al. 2013 [86]           | -                                                                                                                                | -26.1%, P=0.019                          | -4.8%, P=0.318                              | -                                              | -4.1%, P=0.290                  | -                                                         |
| Sala-Vila et al. 2014 [90]         | -                                                                                                                                | -                                        | -                                           | -                                              | -                               | MD (EVOO) vs. CG: -0.03 mm<br>[CI -0.07 to 0.01]; P=0.199 |
|                                    |                                                                                                                                  |                                          |                                             |                                                |                                 | MD (nuts) vs. CG: -0.02 mm<br>[CI -0.06 to 0.02]; P=0.396 |
| Shai et al. 2010 [92]              | -                                                                                                                                | -                                        | -                                           | -                                              | -                               | MD vs. LCHO: 0.03 mm [CI<br>0.01 to 0.06]; P=0.011        |
|                                    |                                                                                                                                  |                                          |                                             |                                                |                                 | MD vs. LFD: 0.02 mm [CI<br>0.003 to 0.04]; P=0.026        |
| Sofi et al. 2018 [97]              | 0.23 µmol/mL [CI 0.05 to 0.41];<br>P=0.014                                                                                       | -                                        | -0.16 pg/mL [CI -0.19 to -0.12];<br>P<0.001 | -                                              | -                               | -                                                         |
| Storniolo et al. 2017 [100]        | MD (EVOO) vs. CG: 0.30 mM<br>Trolox [CI 0.25 to 0.36]; P<0.001<br>MD (nuts) vs. CG: 0.06 mM<br>Trolox [CI 0.02 to 0.10]; P=0.010 | -                                        | -                                           | -                                              | -                               | -                                                         |
| Troscid et al. 2009 [105]          | -                                                                                                                                | -0.34 vs. -0.32 mg/L;<br>P=0.523         | -0.2 vs. -0.21 pg/mL; P=0.871               | -0.72 vs. -0.11µg/mL; P=0.722                  | -0.14 vs. -0.1pg/mL;<br>P=0.963 | -                                                         |

CG, control group; CI, confidence intervals; CRP, C-reactive protein; EVOO, extra virgin olive oil; IL-6, interleukin 6; IMT, intima-media thickness; LCHO, low carbohydrate diet; LFD, low-fat diet; MD, Mediterranean diet; TAC, total antioxidant capacity; TNF-a, tumour necrosis factor a.

**Summary of findings:** The MD, as compared to a control condition, showed a protective effect for total antioxidant capacity in 4/4 comparisons, for C-reactive protein in 4/5 papers, for interleukin-6 in 3/5 papers, for adiponectin in 2/3 papers, for tumour necrosis factor-a in 0/2 papers and for intima-media thickness in 1/5 comparisons.

**Supplementary Figures S1–S28.** Forest plots of controlled trials evaluating the effect of the Mediterranean diet on anthropometric, blood pressure, biochemical, insulin resistance, oxidative stress, inflammatory and endothelial function markers related to the metabolic syndrome

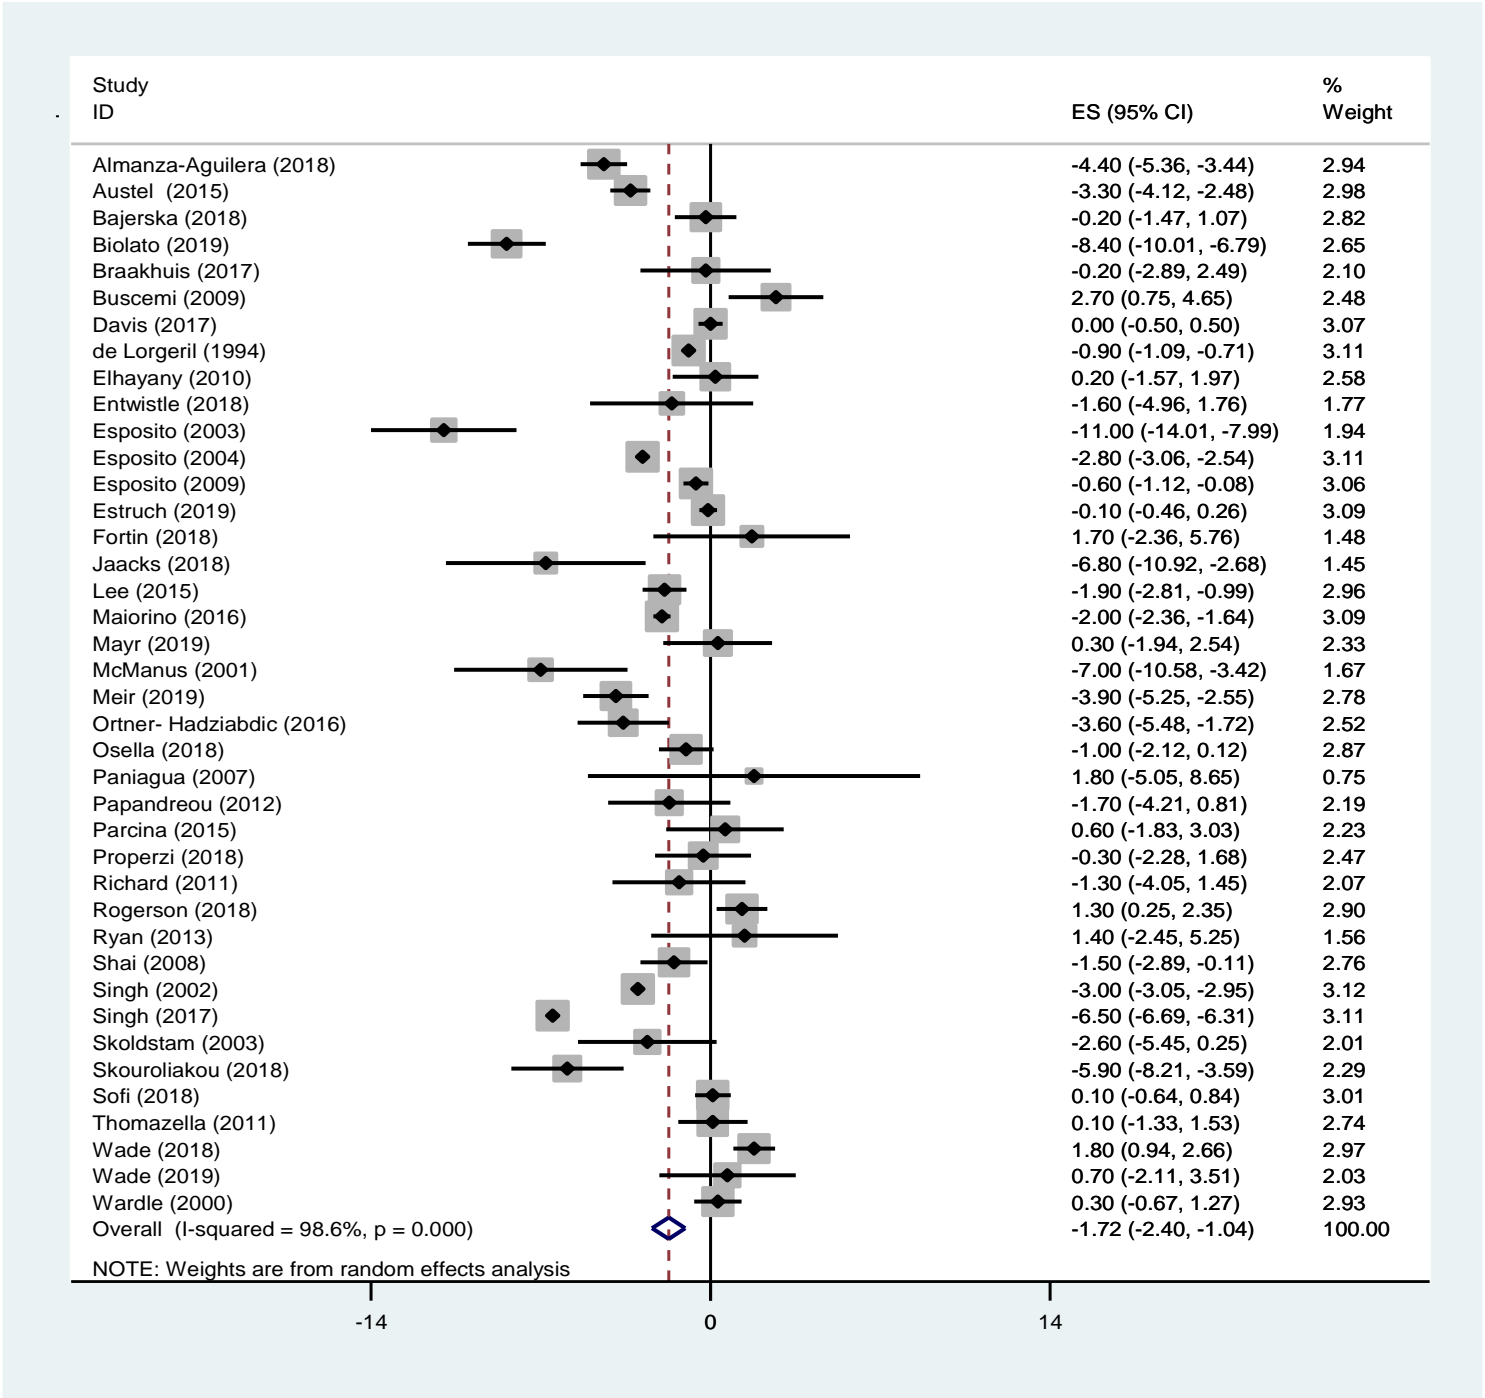

Mean differences were pooled using random effects meta-analysis. Squares indicate effect size for each study (mean difference between intervention and control group), with extended lines representing 95% confidence intervals (95% CIs). Diamonds indicate the overall weighted mean effect size.  $I^2$  indicates between-study heterogeneity. Detailed study characteristics can be found in Table 1 (main manuscript).

**Figure S1.** Forest plot for overall body weight estimate

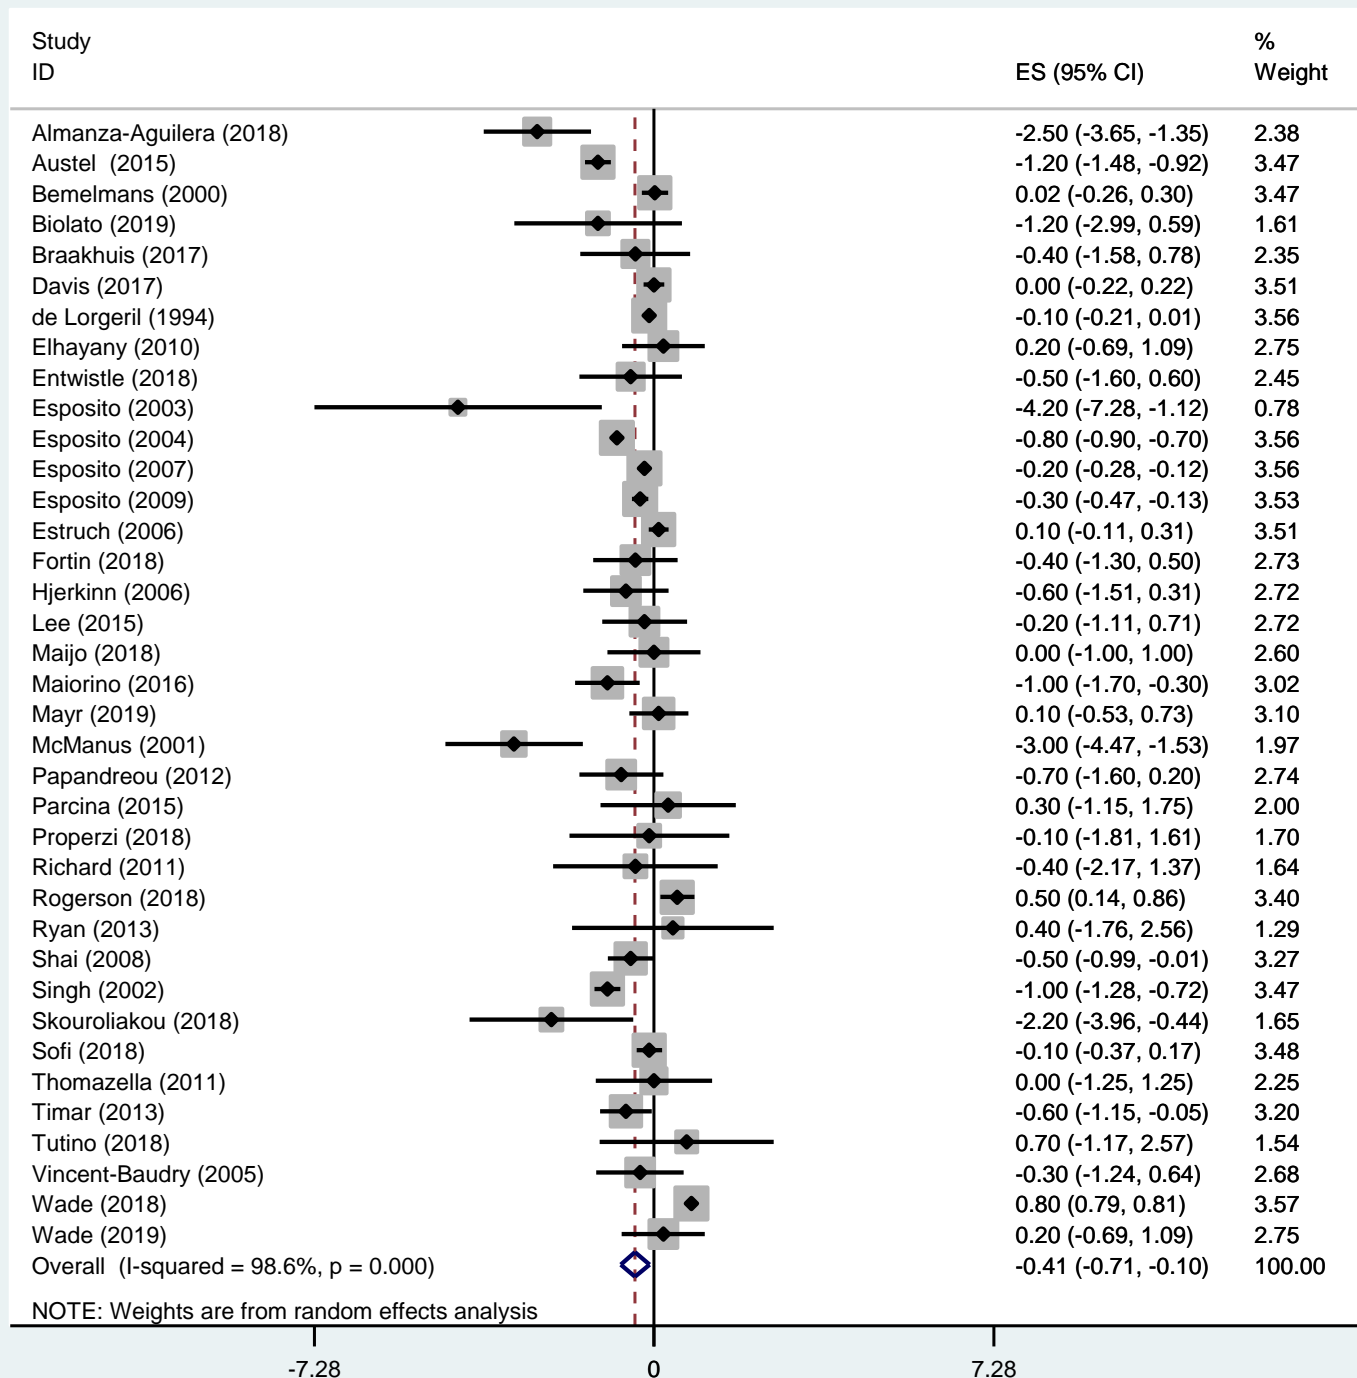

Mean differences were pooled using random effects meta-analysis. Squares indicate effect size for each study (mean difference between intervention and control group), with extended lines representing 95% confidence intervals (95% CIs). Diamonds indicate the overall weighted mean effect size.  $I^2$  indicates between-study heterogeneity.

Detailed study characteristics can be found in Table 1 (main manuscript).

**Figure S2. Forest plot for overall body mass index estimate**

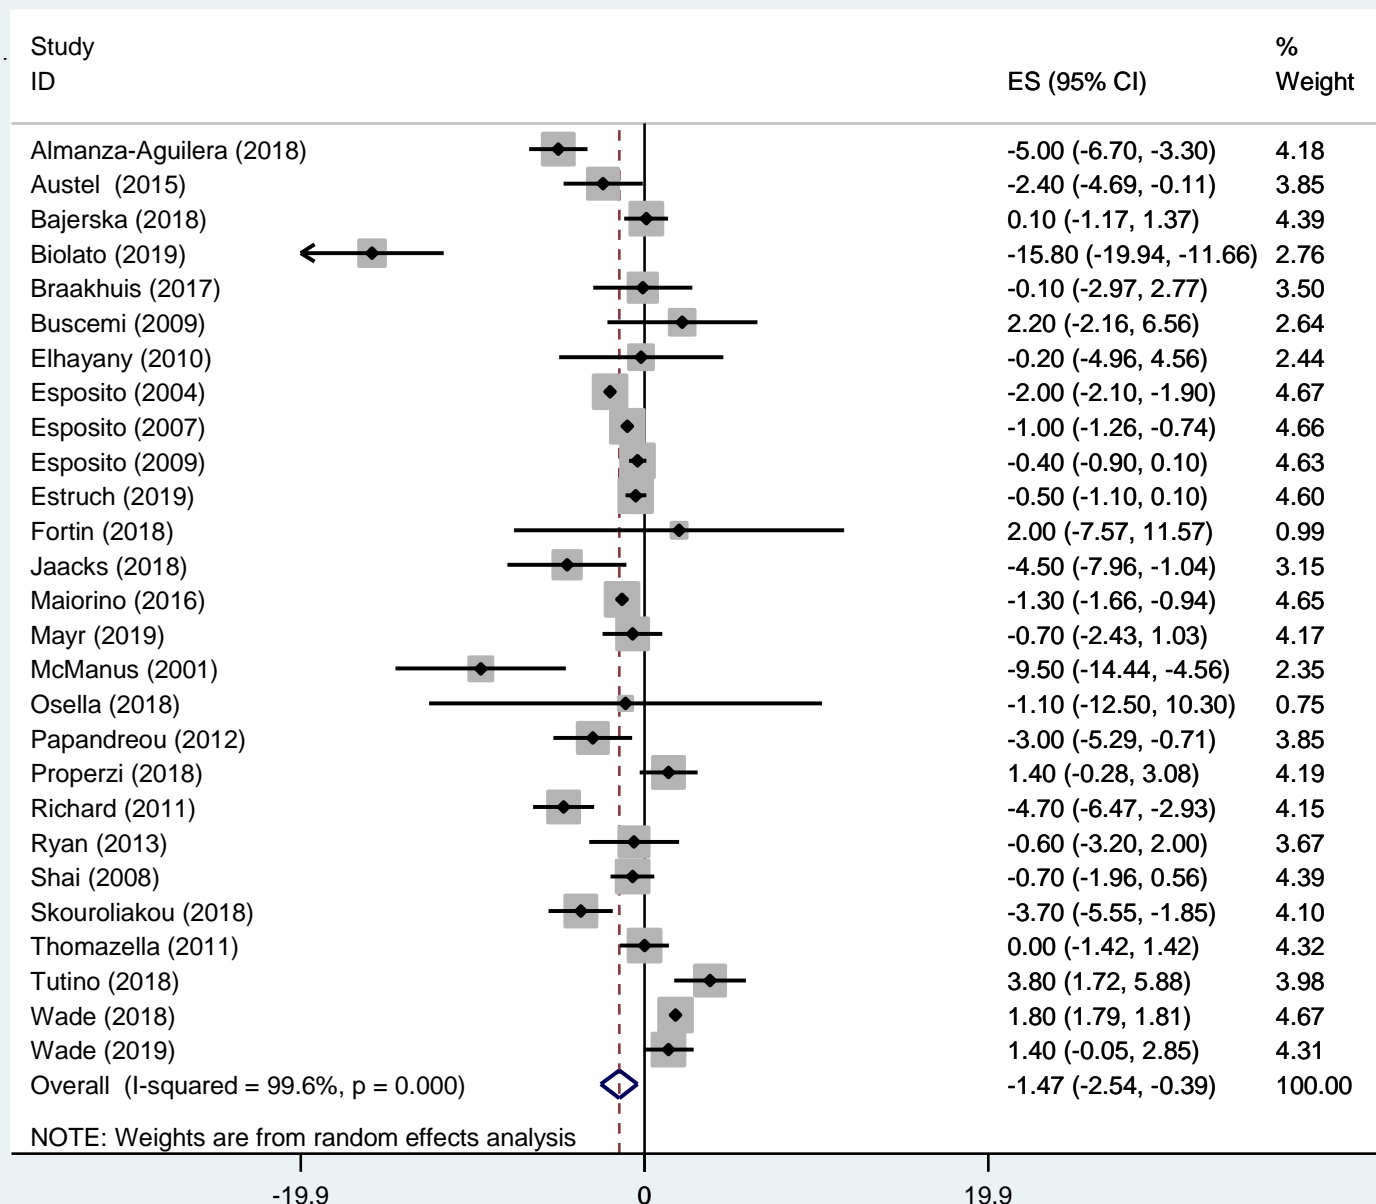

Mean differences were pooled using random effects meta-analysis. Squares indicate effect size for each study (mean difference between intervention and control group), with extended lines representing 95% confidence intervals (95% CIs). Diamonds indicate the overall weighted mean effect size.  $I^2$  indicates between-study heterogeneity. Detailed study characteristics can be found in Table 1 (main manuscript).

**Figure S3: Forest plot for overall waist circumference**

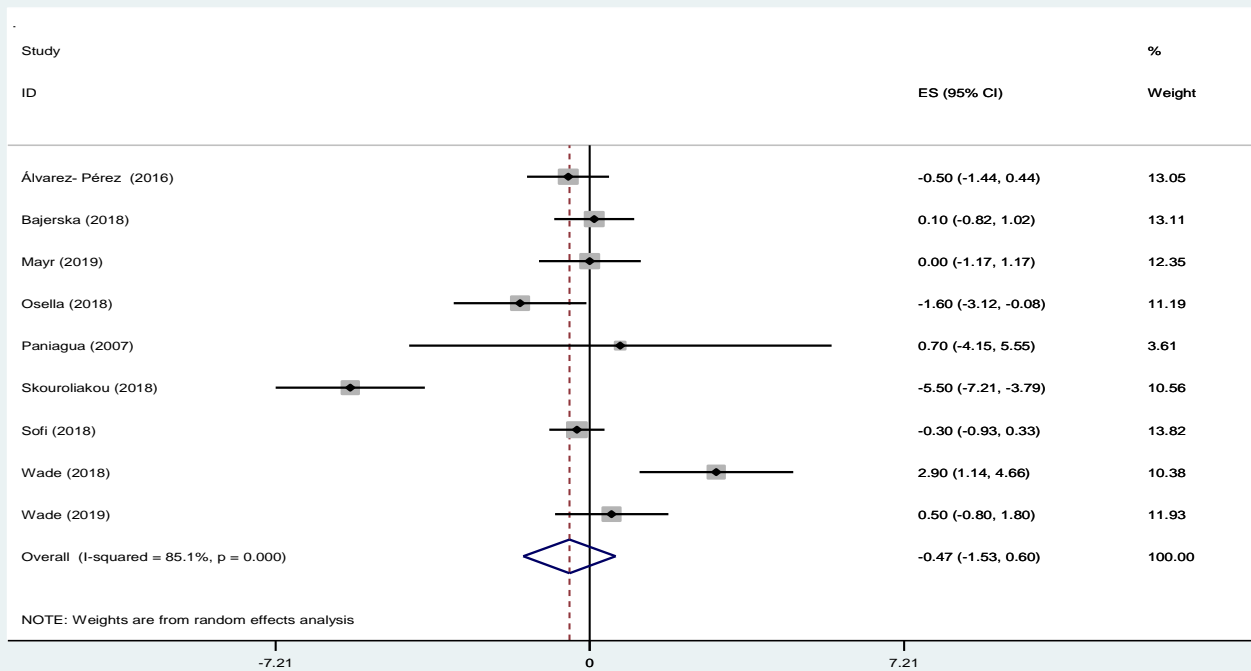

Mean differences were pooled using random effects meta-analysis. Squares indicate effect size for each study (mean difference between intervention and control group), with extended lines representing 95% confidence intervals (95% CIs). Diamonds indicate the overall weighted mean effect size.  $I^2$  indicates between-study heterogeneity. Detailed study characteristics can be found in Table 1 (main manuscript).

**Figure S4: Forest plot for overall total fat mass (kg)**

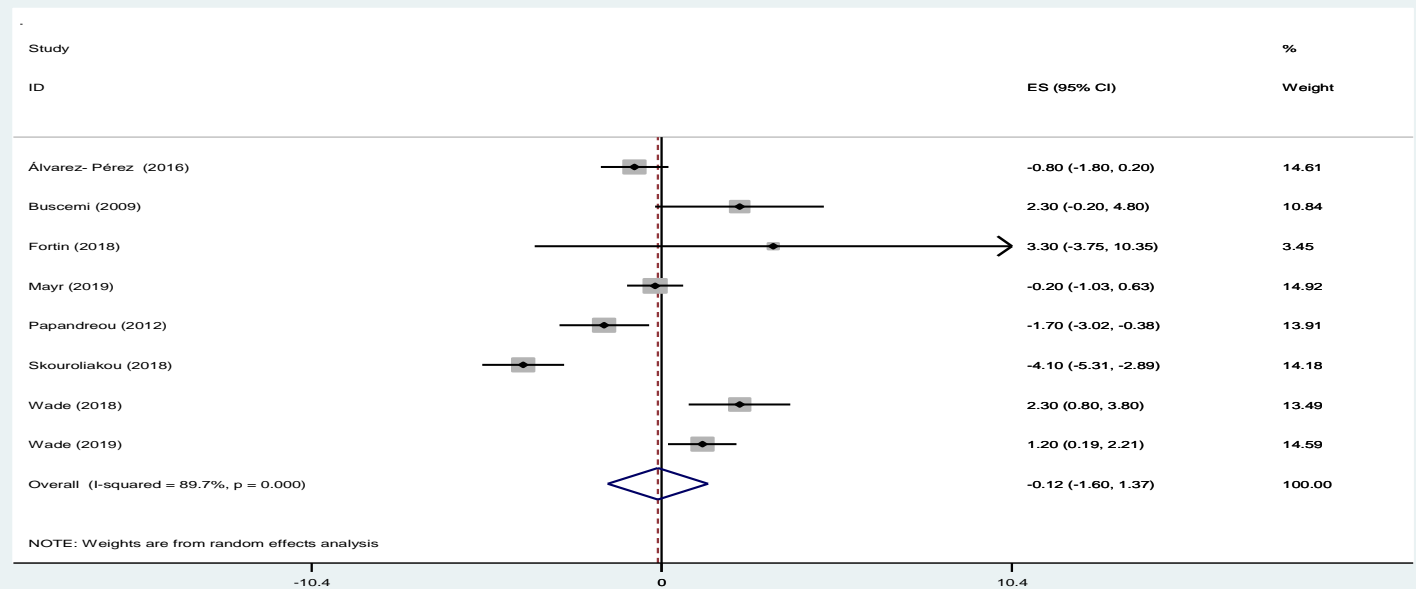

Mean differences were pooled using random effects meta-analysis. Squares indicate effect size for each study (mean difference between intervention and control group), with extended lines representing 95% confidence intervals (95% CIs). Diamonds indicate the overall weighted mean effect size.  $I^2$  indicates between-study heterogeneity. Detailed study characteristics can be found in Table 1 (main manuscript).

**Figure S5: Forest plot for overall total body fat (%)**

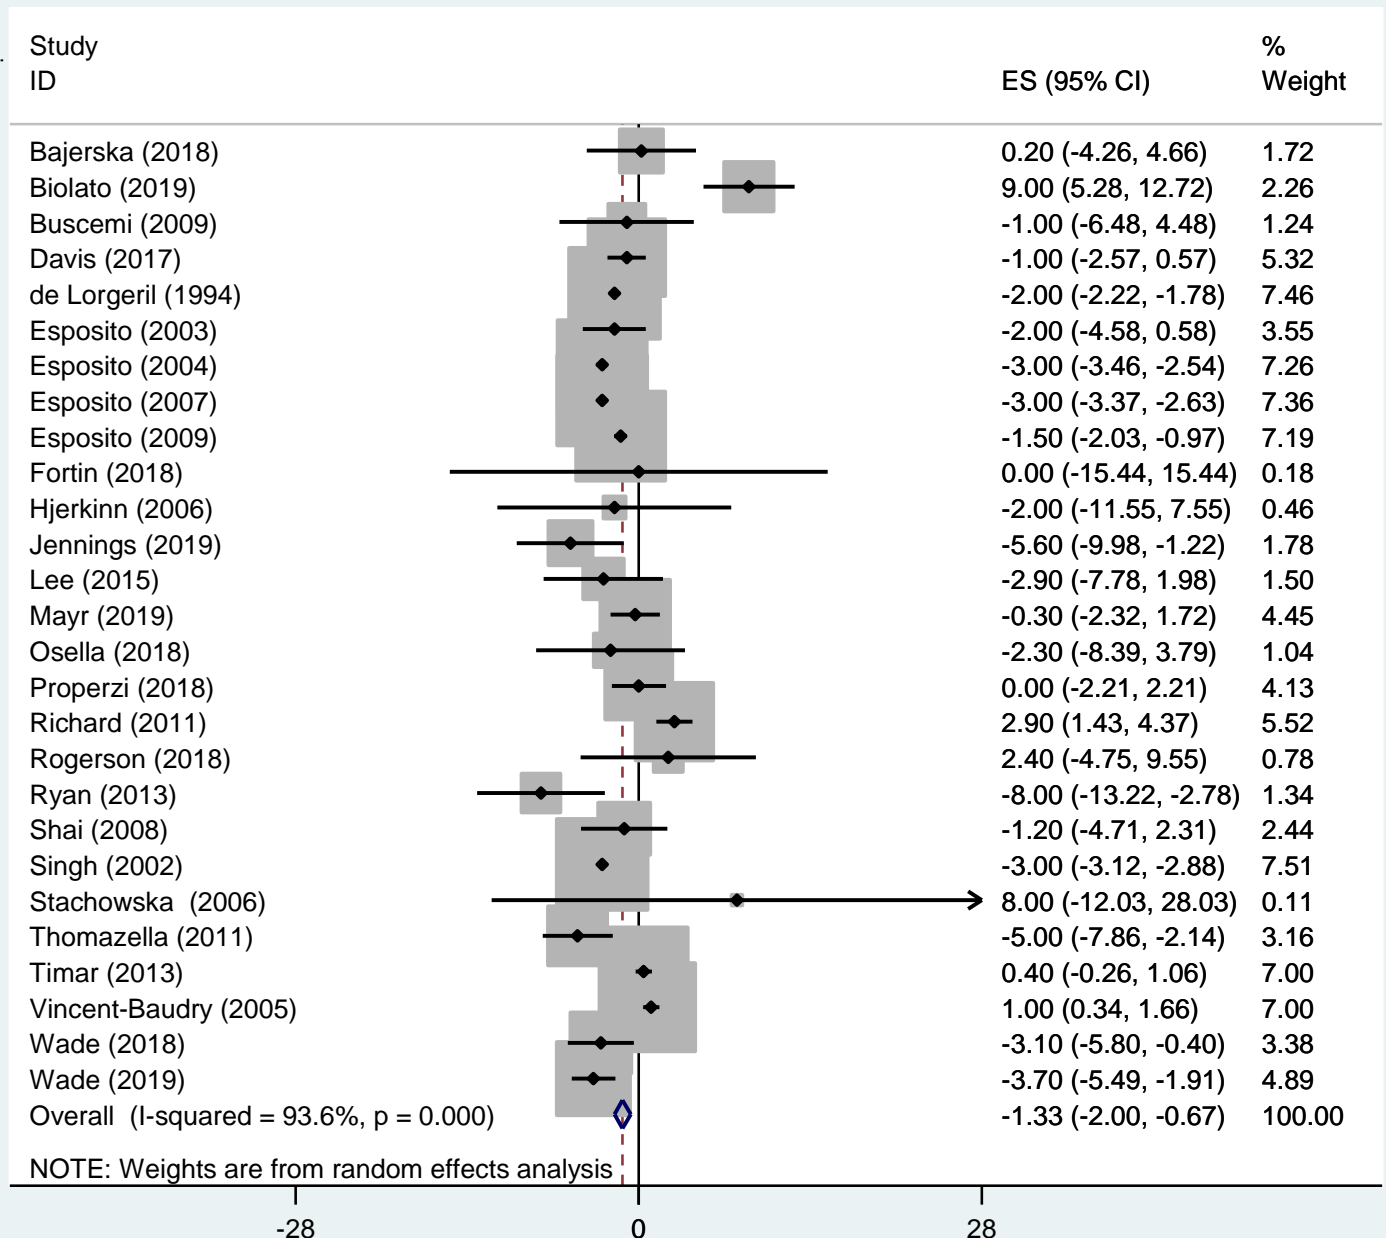

Mean differences were pooled using random effects meta-analysis. Squares indicate effect size for each study (mean difference between intervention and control group), with extended lines representing 95% confidence intervals (95% CIs). Diamonds indicate the overall weighted mean effect size.  $I^2$  indicates between-study heterogeneity. Detailed study characteristics can be found in Table 1 (main manuscript).

**Figure S6: Forest plot for overall systolic blood pressure**

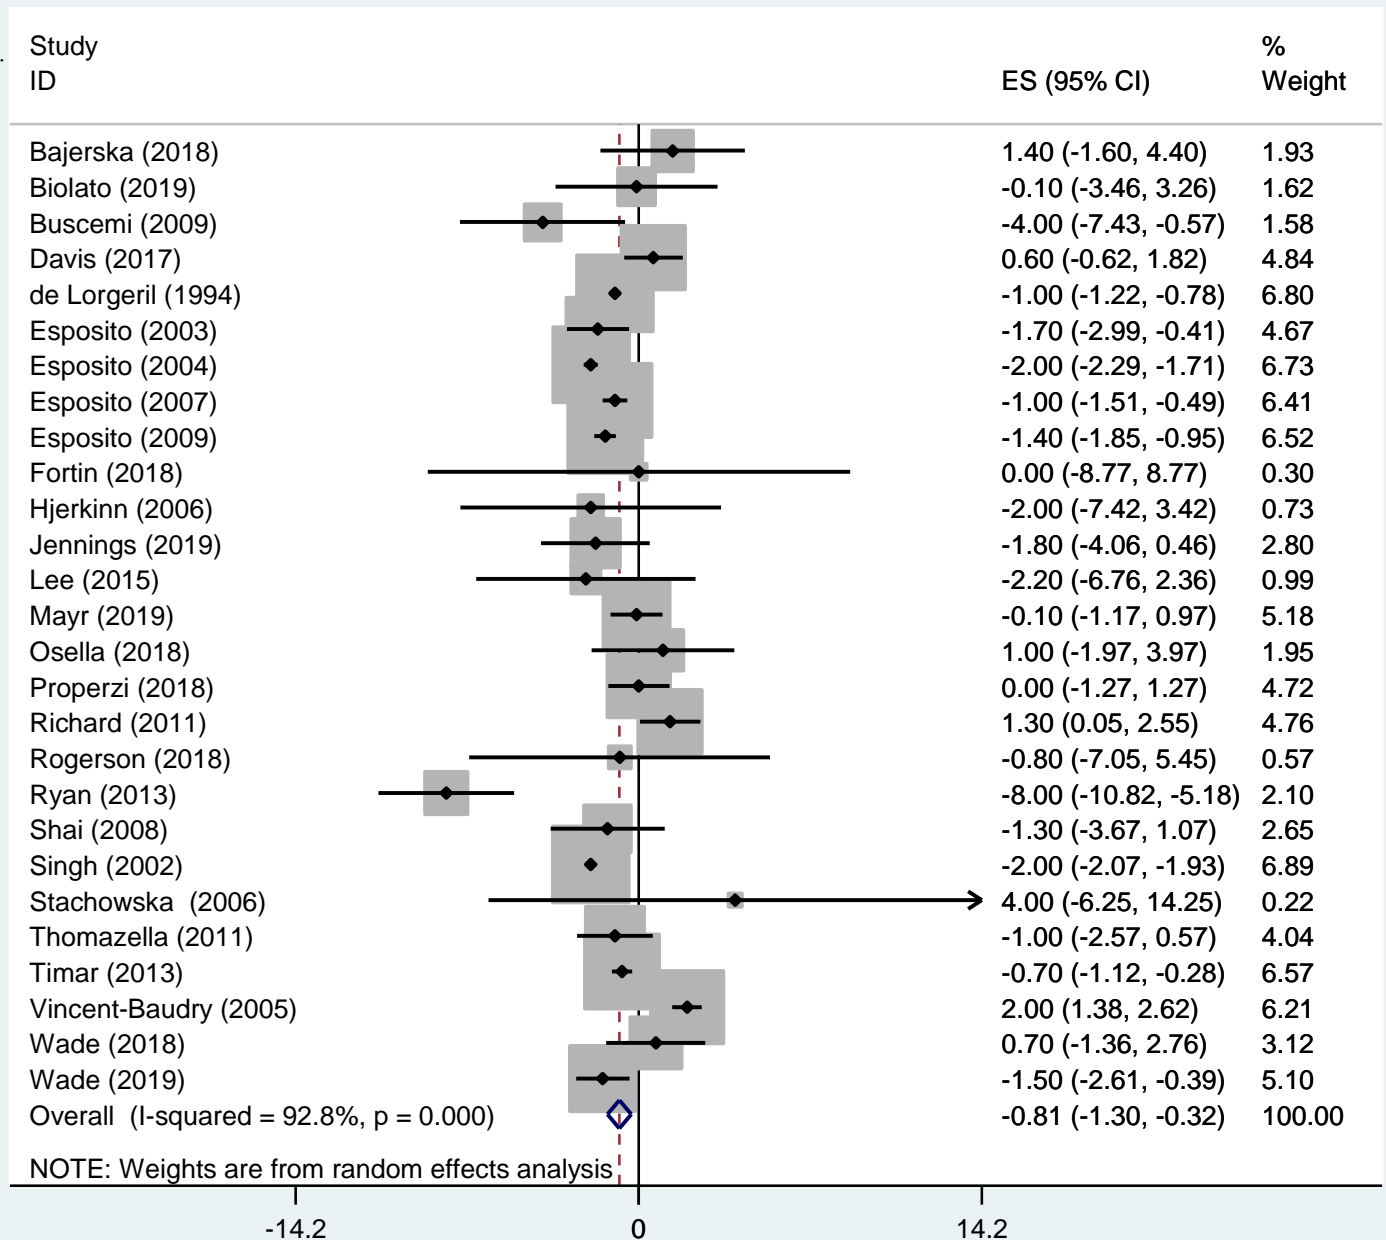

Mean differences were pooled using random effects meta-analysis. Squares indicate effect size for each study (mean difference between intervention and control group), with extended lines representing 95% confidence intervals (95% CIs). Diamonds indicate the overall weighted mean effect size.  $I^2$  indicates between-study heterogeneity. Detailed study characteristics can be found in Table 1 (main manuscript).

**Figure S7: Forest plot for overall diastolic blood pressure**



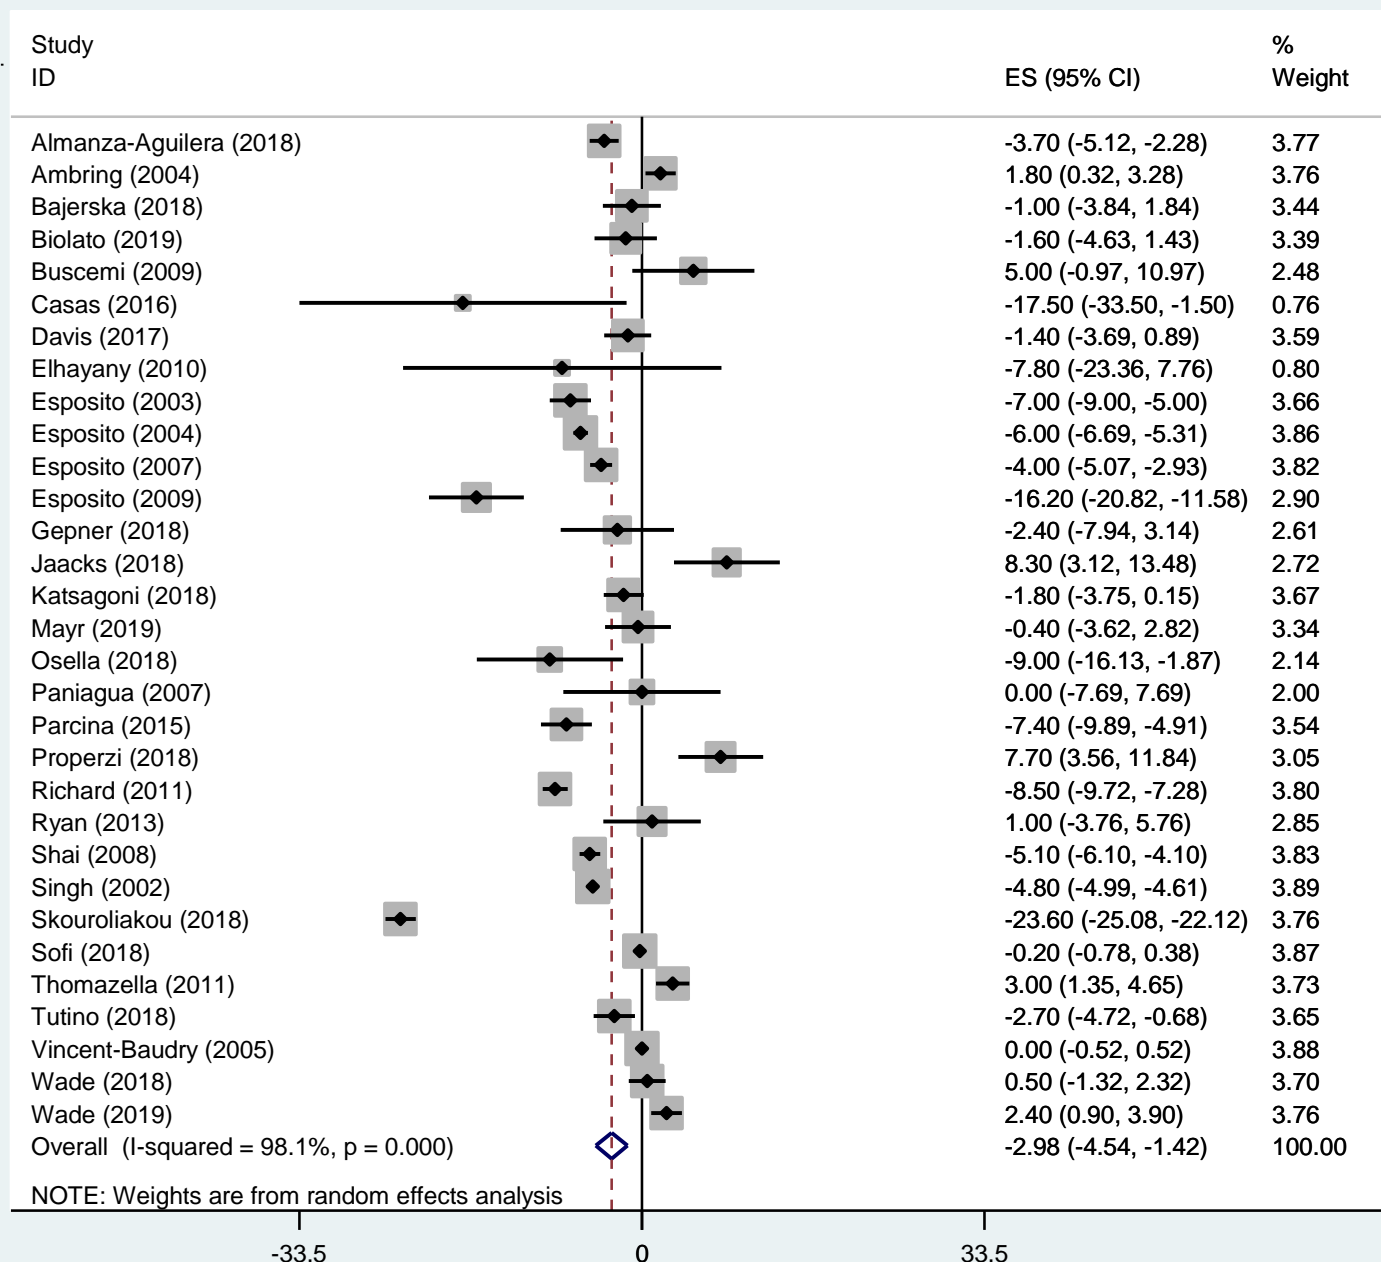

Mean differences were pooled using random effects meta-analysis. Squares indicate effect size for each study (mean difference between intervention and control group), with extended lines representing 95% confidence intervals (95% CIs). Diamonds indicate the overall weighted mean effect size.  $I^2$  indicates between-study heterogeneity.

Detailed study characteristics can be found in Table 1 (main manuscript).

**Figure S8: Forest plot for overall blood glucose**

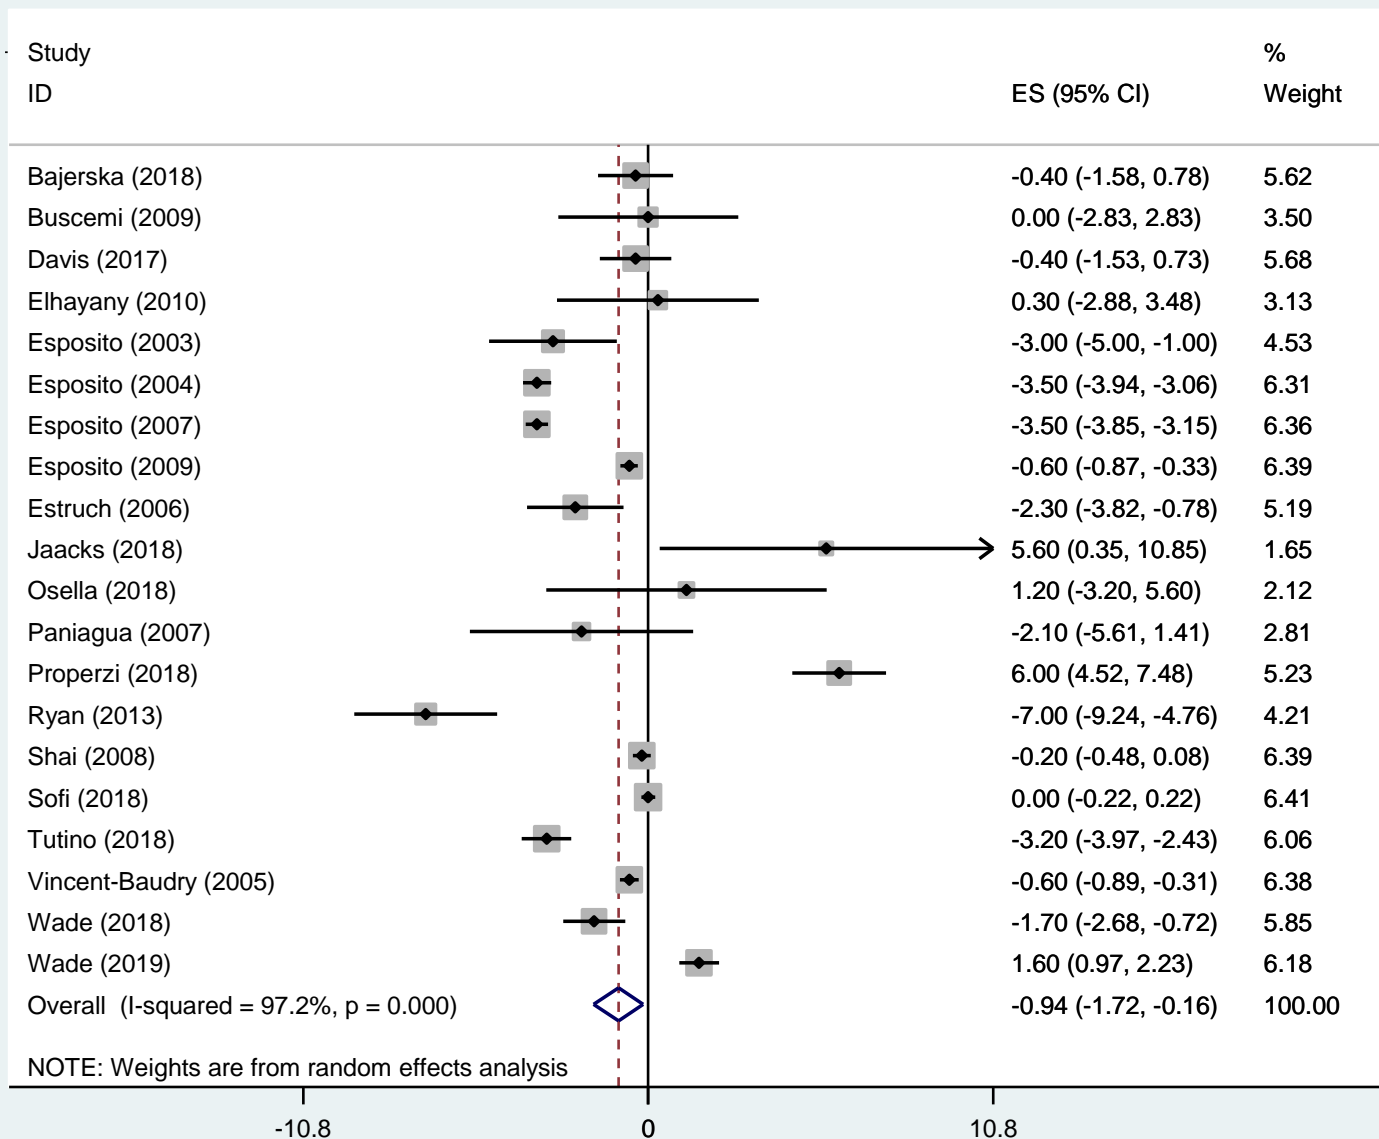

Mean differences were pooled using random effects meta-analysis. Squares indicate effect size for each study (mean difference between intervention and control group), with extended lines representing 95% confidence intervals (95% CIs). Diamonds indicate the overall weighted mean effect size.  $I^2$  indicates between-study heterogeneity. Detailed study characteristics can be found in Table 1 (main manuscript).

**Figure S9: Forest plot for overall blood insulin**

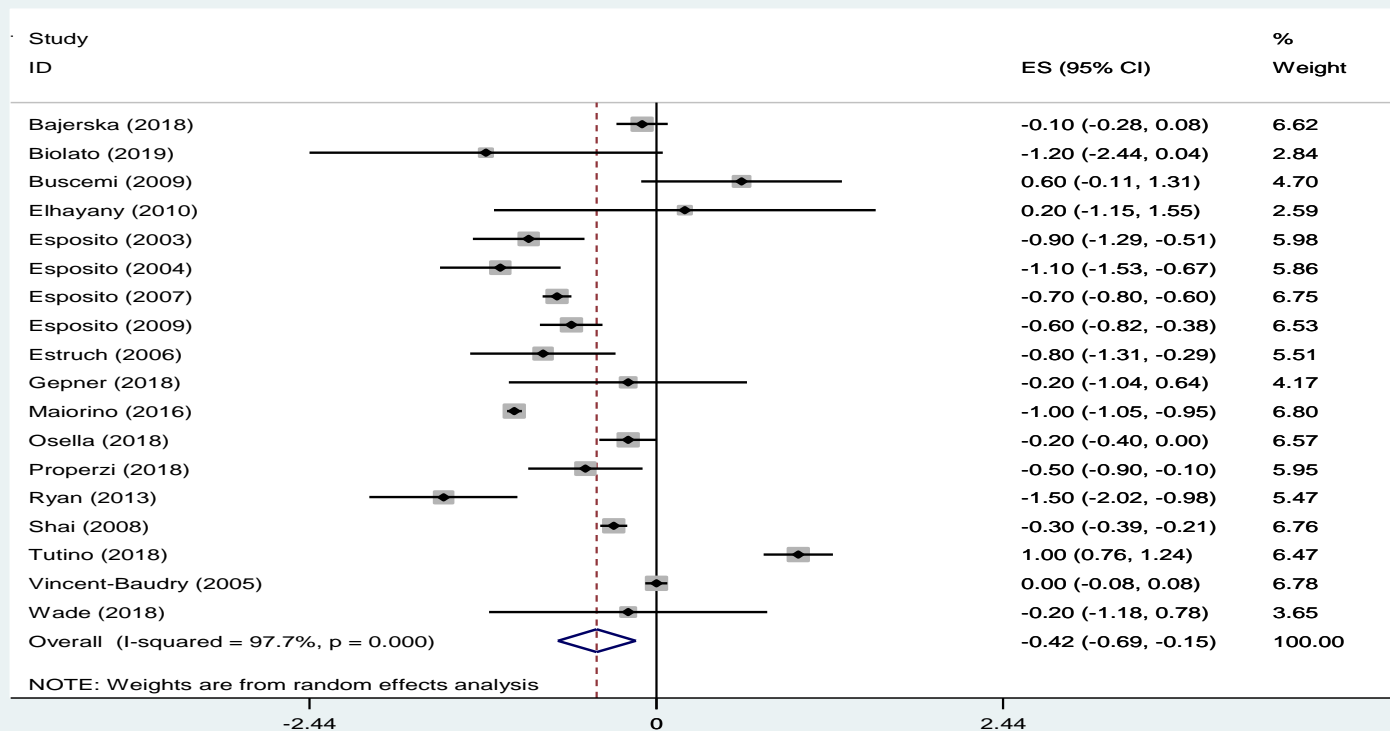

Mean differences were pooled using random effects meta-analysis. Squares indicate effect size for each study (mean difference between intervention and control group), with extended lines representing 95% confidence intervals (95% CIs). Diamonds indicate the overall weighted mean effect size.  $I^2$  indicates between-study heterogeneity. Detailed study characteristics can be found in Table 1 (main manuscript).

**Figure S10: Forest plot for overall HOMA-IR index**

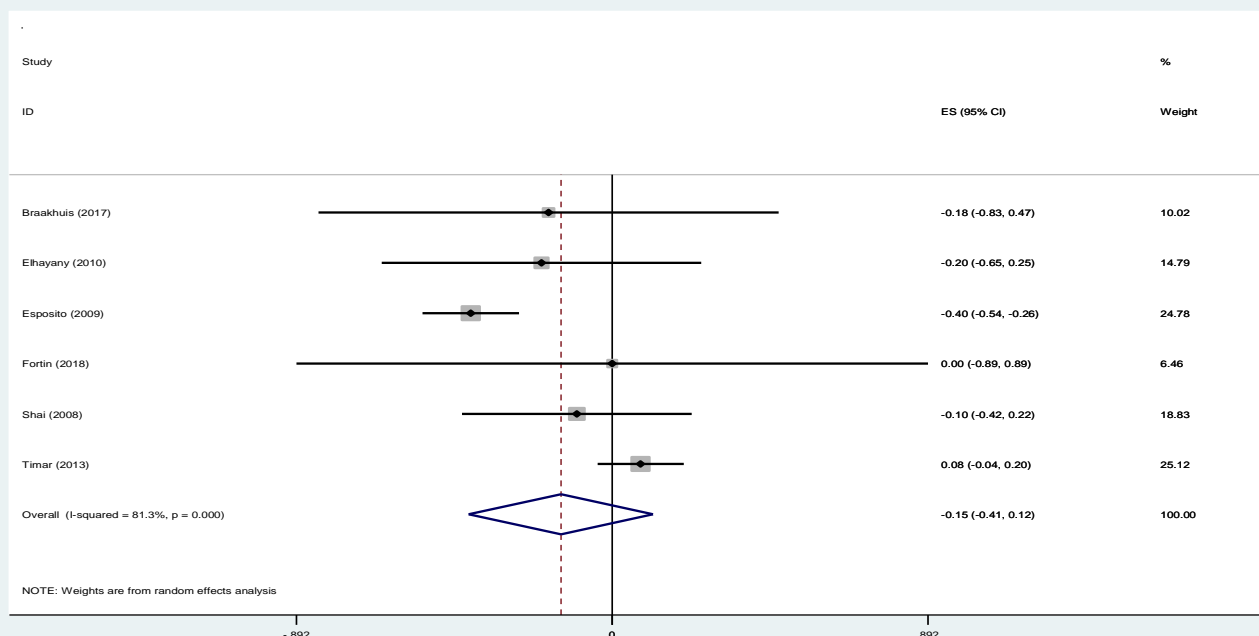

Mean differences were pooled using random effects meta-analysis. Squares indicate effect size for each study (mean difference between intervention and control group), with extended lines representing 95% confidence intervals (95% CIs). Diamonds indicate the overall weighted mean effect size.  $I^2$  indicates between-study heterogeneity. Detailed study characteristics can be found in Table 1 (main manuscript).

**Figure S11: Forest plot for overall glycosylated hemoglobin (HbA1c)**

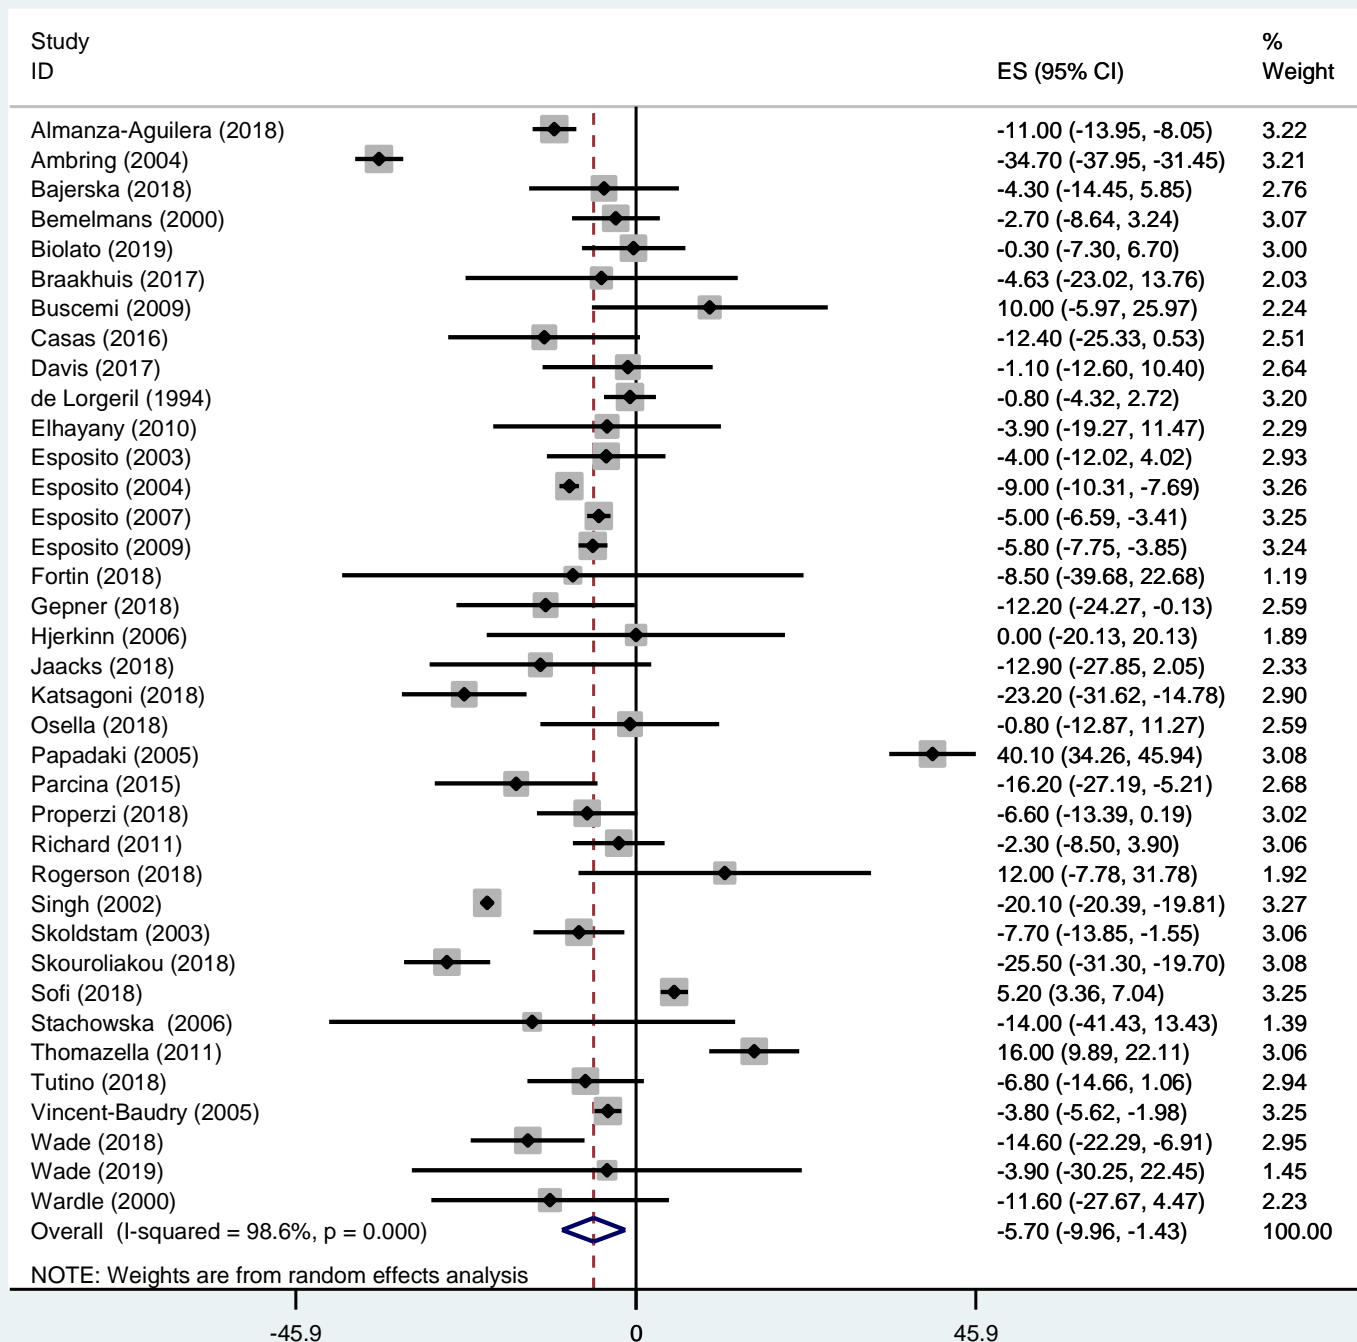

Mean differences were pooled using random effects meta-analysis. Squares indicate effect size for each study (mean difference between intervention and control group), with extended lines representing 95% confidence intervals (95% CIs). Diamonds indicate the overall weighted mean effect size.  $I^2$  indicates between-study heterogeneity. Detailed study characteristics can be found in Table 1 (main manuscript).

**Figure S12: Forest plot for overall blood total cholesterol**

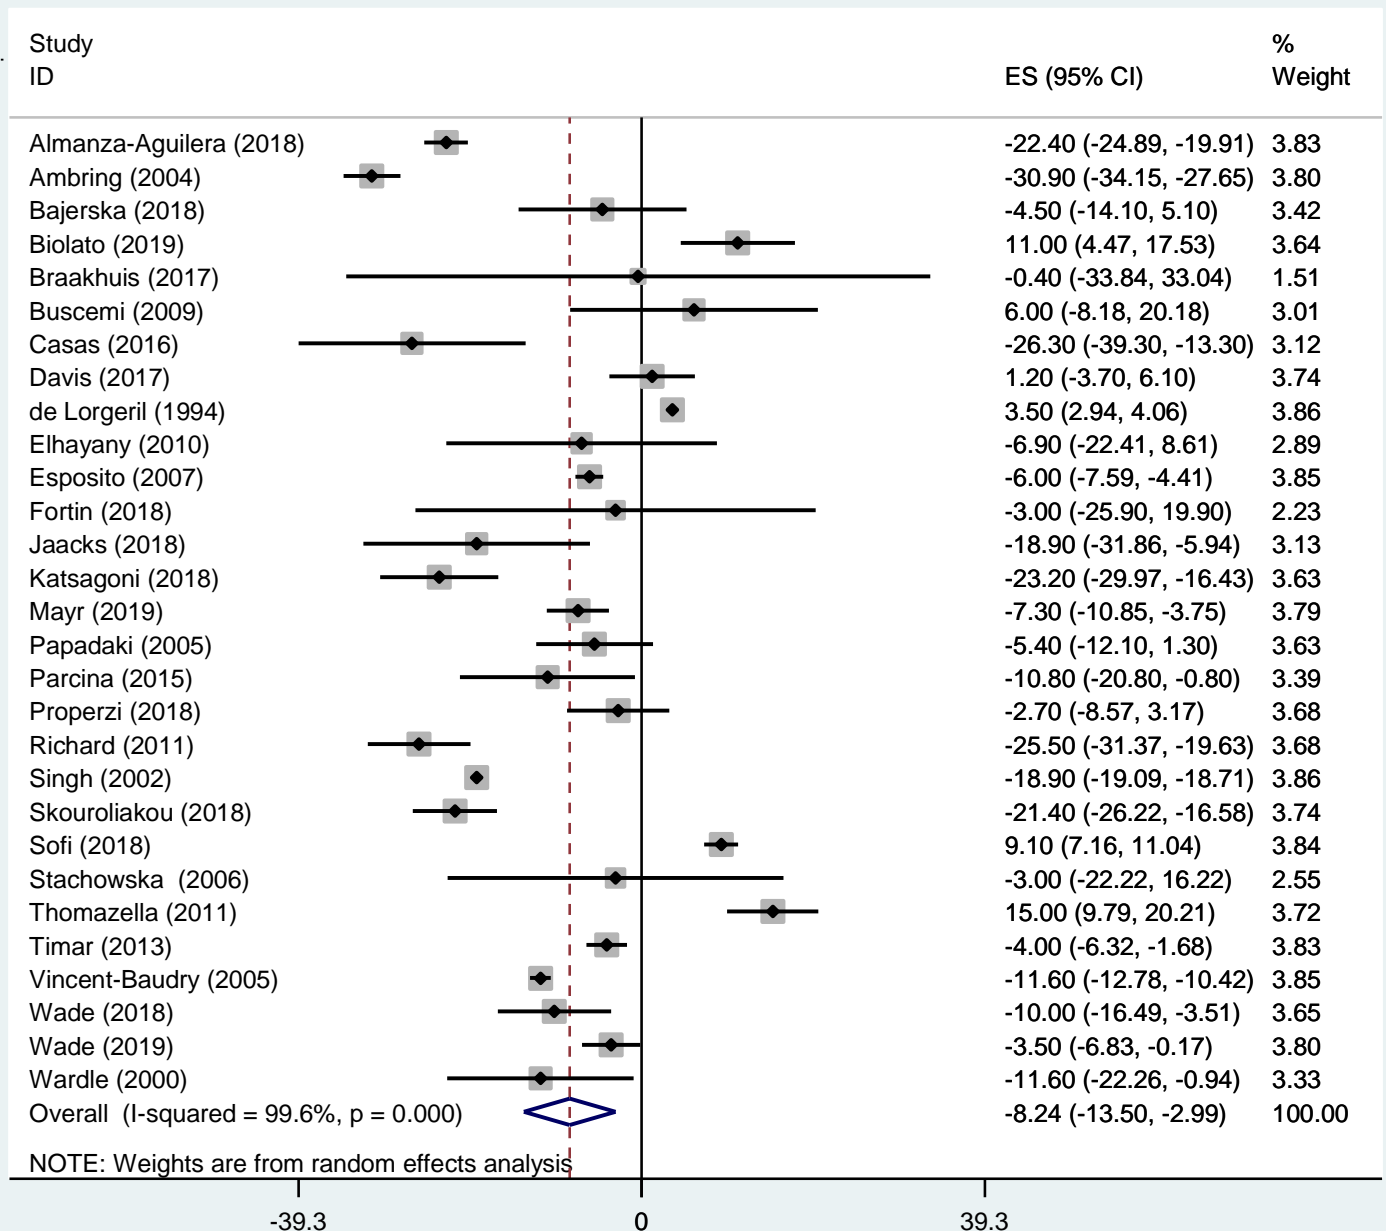

Mean differences were pooled using random effects meta-analysis. Squares indicate effect size for each study (mean difference between intervention and control group), with extended lines representing 95% confidence intervals (95% CIs). Diamonds indicate the overall weighted mean effect size.  $I^2$  indicates between-study heterogeneity. Detailed study characteristics can be found in Table 1 (main manuscript).

**Figure S13: Forest plot for overall blood LDL-cholesterol**

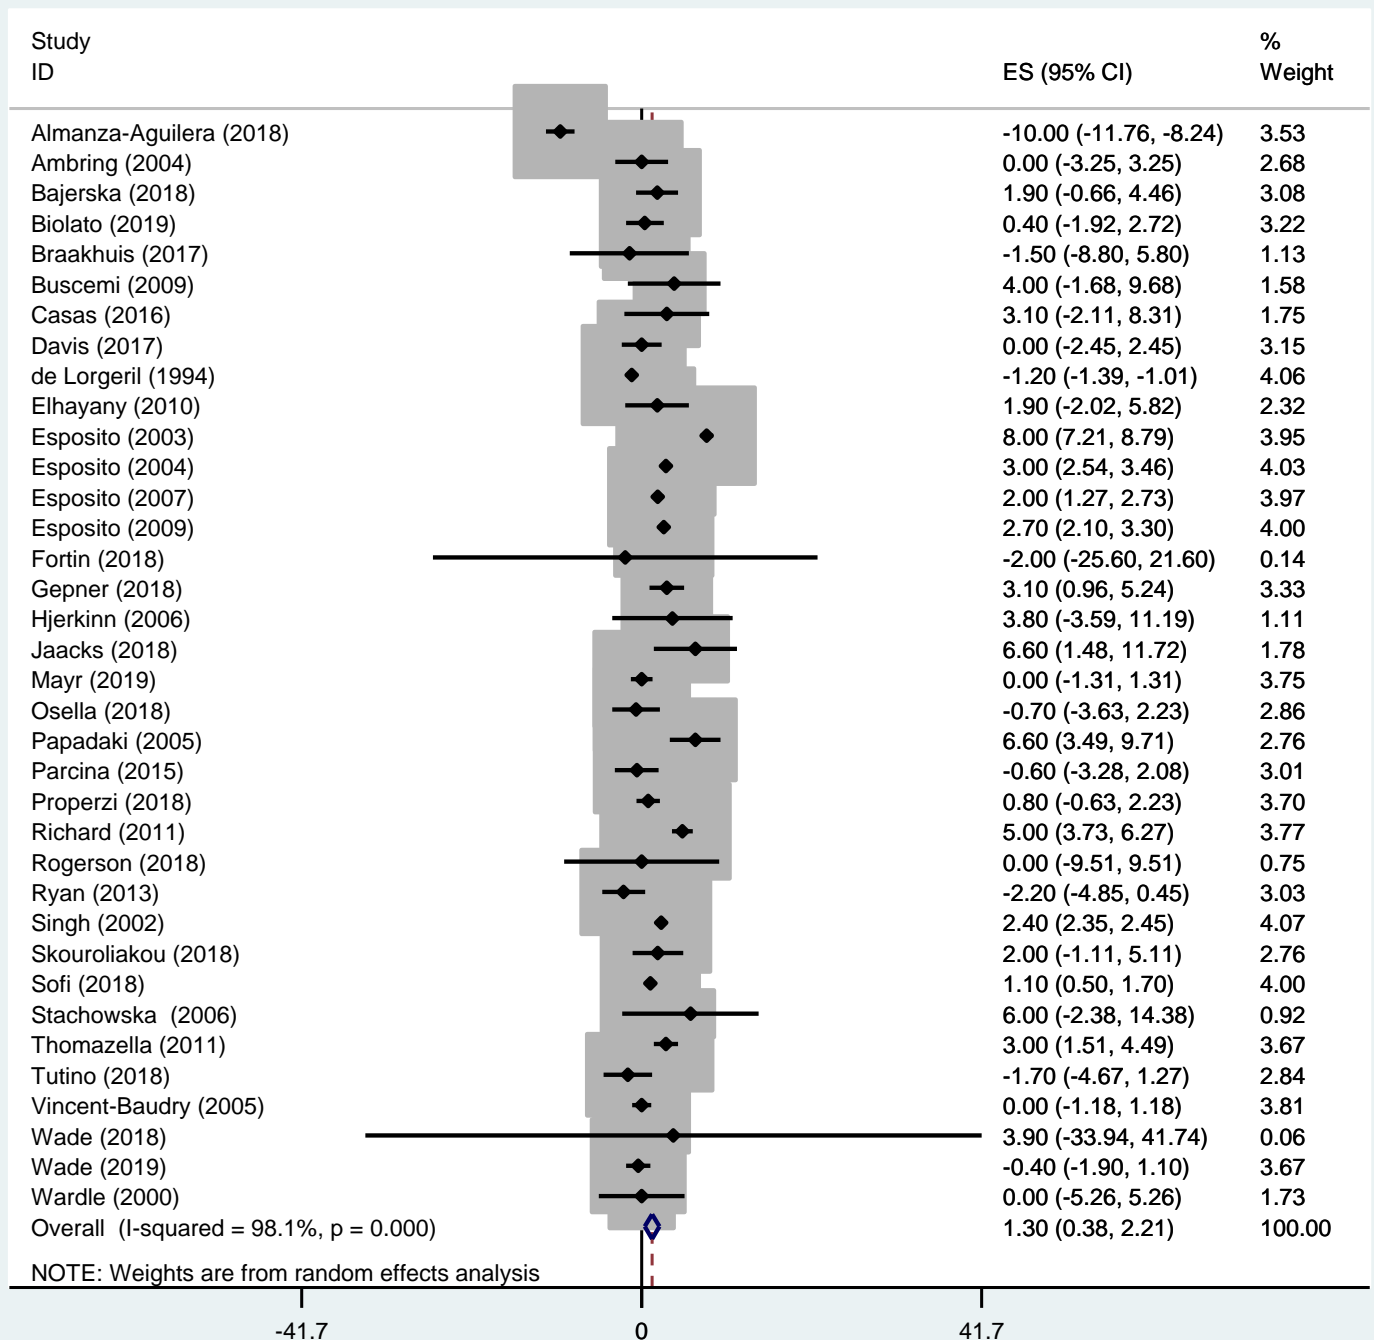

Mean differences were pooled using random effects meta-analysis. Squares indicate effect size for each study (mean difference between intervention and control group), with extended lines representing 95% confidence intervals (95% CIs). Diamonds indicate the overall weighted mean effect size.  $I^2$  indicates between-study heterogeneity. Detailed study characteristics can be found in Table 1 (main manuscript).

**Figure S14: Forest plot for overall blood HDL-cholesterol**

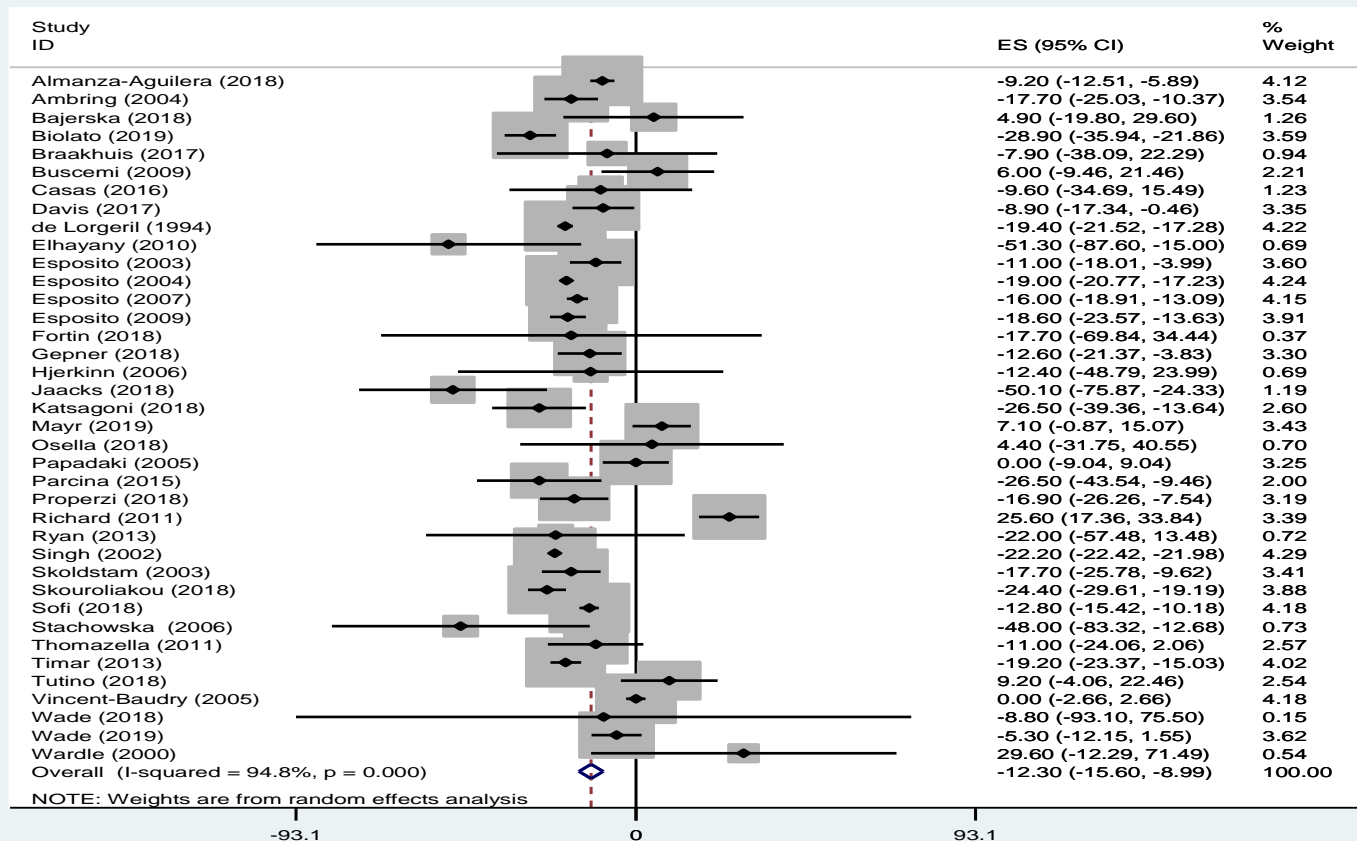

Mean differences were pooled using random effects meta-analysis. Squares indicate effect size for each study (mean difference between intervention and control group), with extended lines representing 95% confidence intervals (95% CIs). Diamonds indicate the overall weighted mean effect size.  $I^2$  indicates between-study heterogeneity.

Detailed study characteristics can be found in Table 1 (main manuscript).

**Figure S15: Forest plot for overall blood triglycerides**

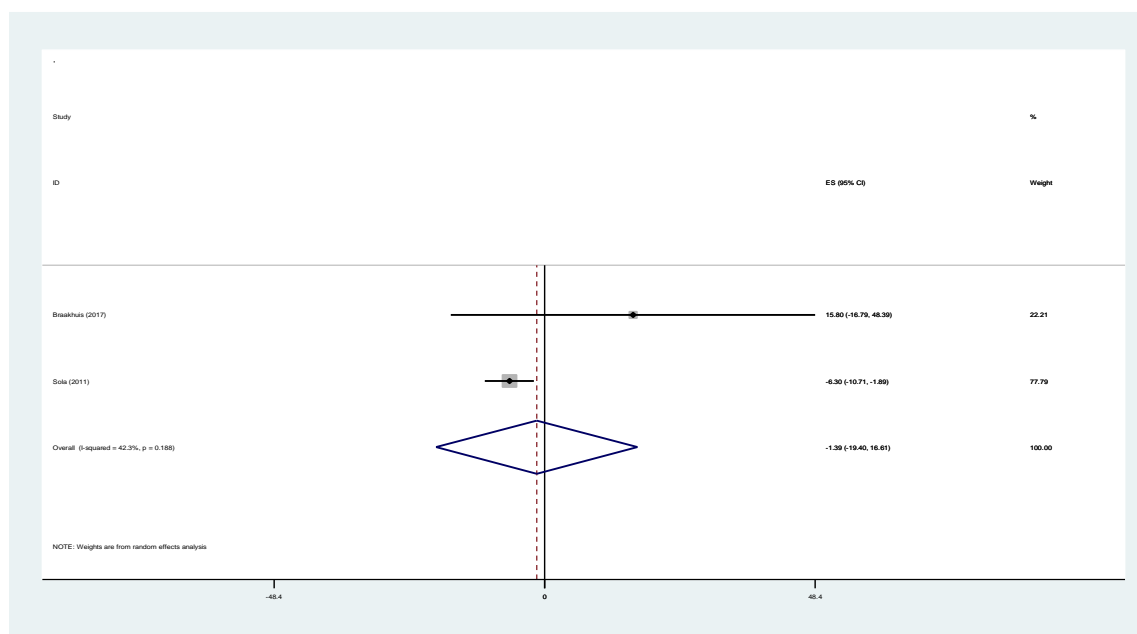

Mean differences were pooled using random effects meta-analysis. Squares indicate effect size for each study (mean difference between intervention and control group), with extended lines representing 95% confidence intervals (95% CIs). Diamonds indicate the overall weighted mean effect size.  $I^2$  indicates between-study heterogeneity.

Detailed study characteristics can be found in Table 1 (main manuscript).

**Figure S16: Forest plot for overall blood non-HDL cholesterol**

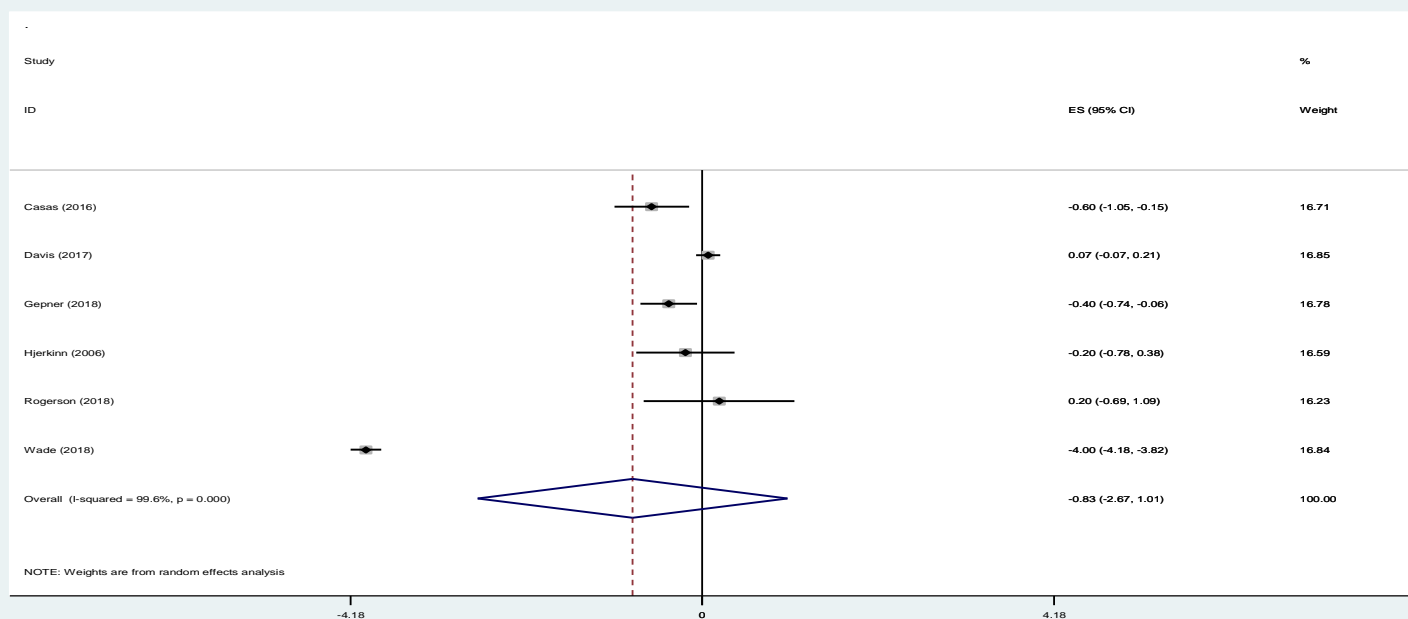

Mean differences were pooled using random effects meta-analysis. Squares indicate effect size for each study (mean difference between intervention and control group), with extended lines representing 95% confidence intervals (95% CIs). Diamonds indicate the overall weighted mean effect size.  $I^2$  indicates between-study heterogeneity. Detailed study characteristics can be found in Table 1 (main manuscript).

**Figure S17: Forest plot for overall blood total:HDL cholesterol ratio**

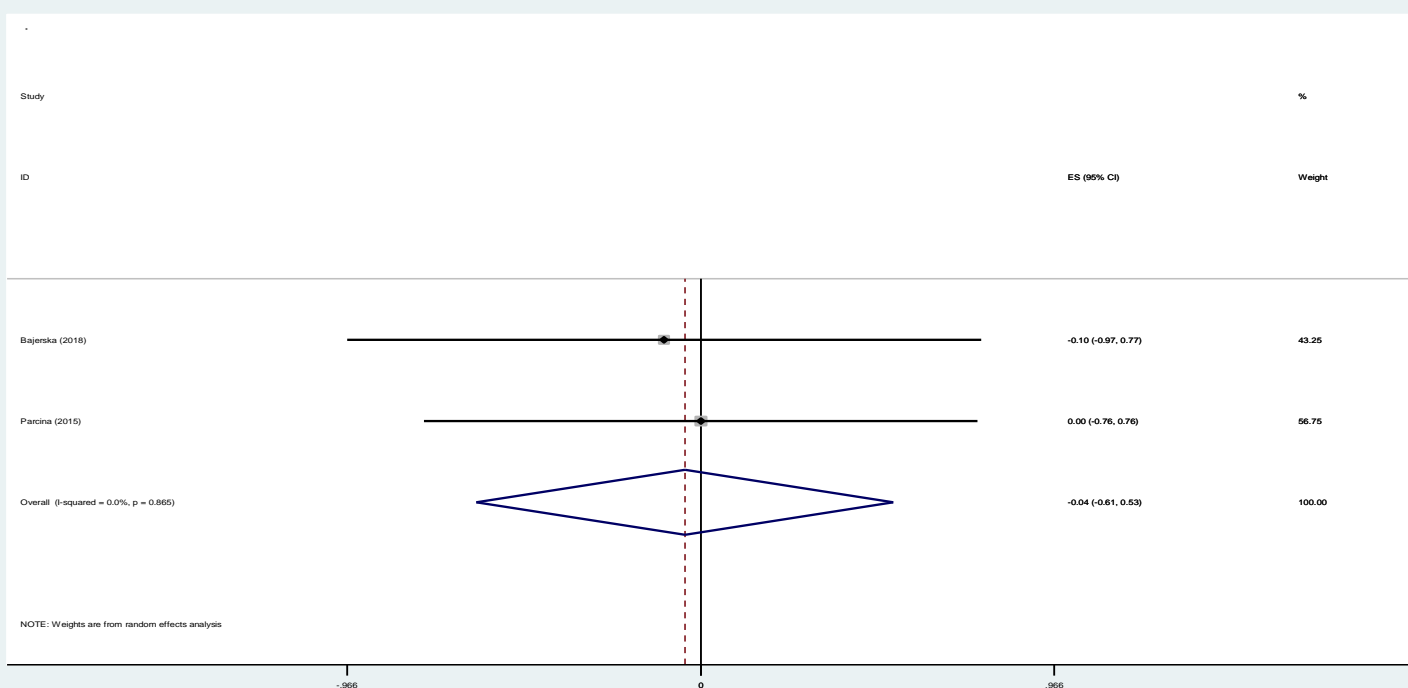

Mean differences were pooled using random effects meta-analysis. Squares indicate effect size for each study (mean difference between intervention and control group), with extended lines representing 95% confidence intervals (95% CIs). Diamonds indicate the overall weighted mean effect size.  $I^2$  indicates between-study heterogeneity. Detailed study characteristics can be found in Table 1 (main manuscript).

**Figure S18: Forest plot for overall blood homocysteine**



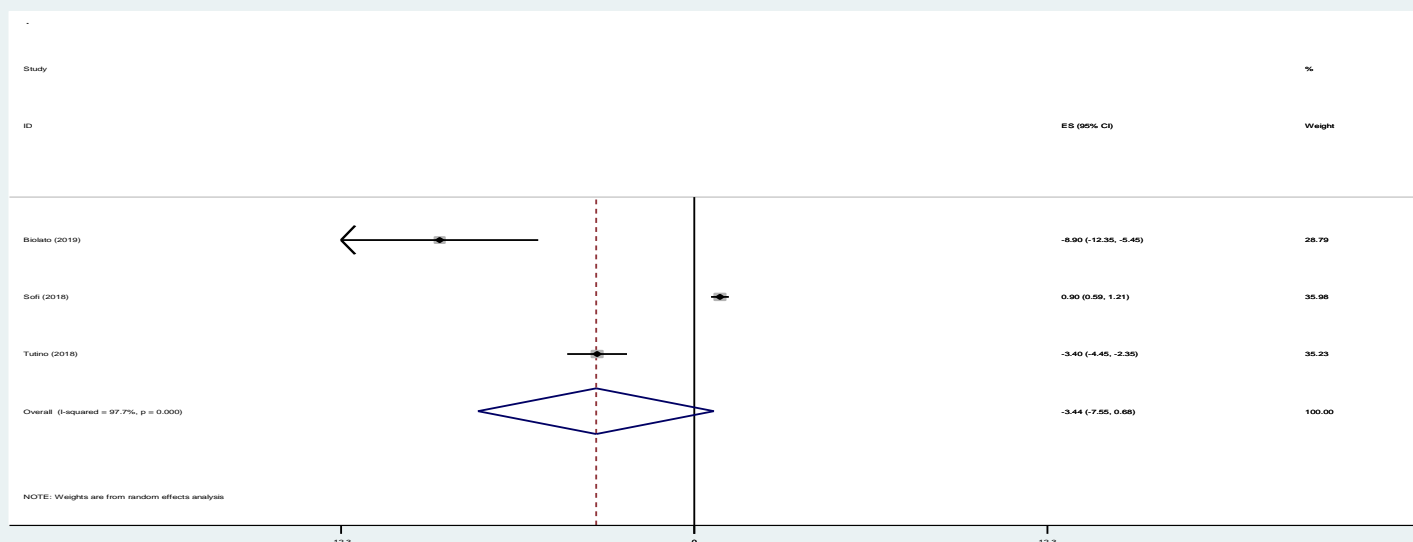

Mean differences were pooled using random effects meta-analysis. Squares indicate effect size for each study (mean difference between intervention and control group), with extended lines representing 95% confidence intervals (95% CIs). Diamonds indicate the overall weighted mean effect size.  $I^2$  indicates between-study heterogeneity. Detailed study characteristics can be found in Table 1 (main manuscript).

**Figure S19: Forest plot for overall urine aspartame aminotransferase (AST)**

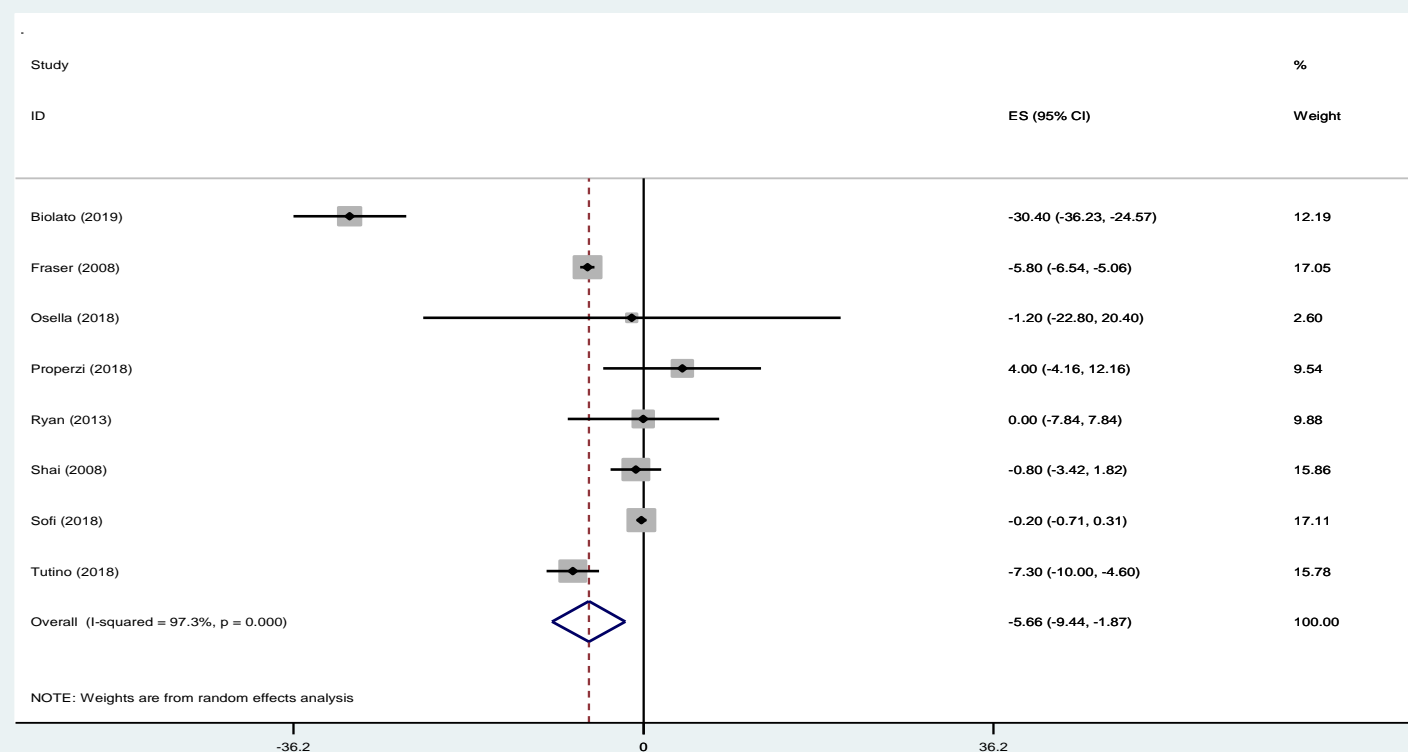

Mean differences were pooled using random effects meta-analysis. Squares indicate effect size for each study (mean difference between intervention and control group), with extended lines representing 95% confidence intervals (95% CIs). Diamonds indicate the overall weighted mean effect size.  $I^2$  indicates between-study heterogeneity. Detailed study characteristics can be found in Table 1 (main manuscript).

**Figure S20: Forest plot for overall urine alanine aminotransferase (ALT)**

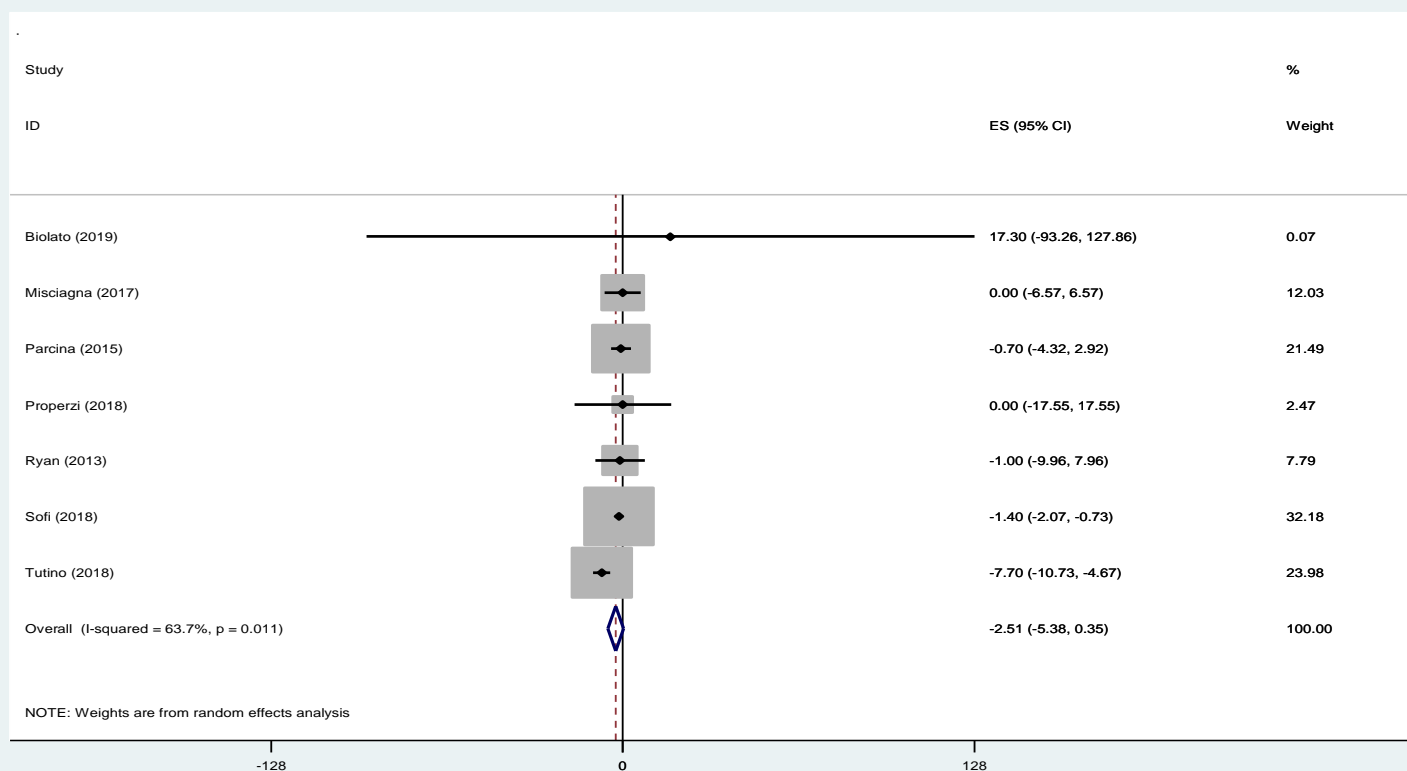

Mean differences were pooled using random effects meta-analysis. Squares indicate effect size for each study (mean difference between intervention and control group), with extended lines representing 95% confidence intervals (95% CIs). Diamonds indicate the overall weighted mean effect size.  $I^2$  indicates between-study heterogeneity. Detailed study characteristics can be found in Table 1 (main manuscript).

**Figure S21: Forest plot for overall urine gamma glutamyl transferase (GGT)**

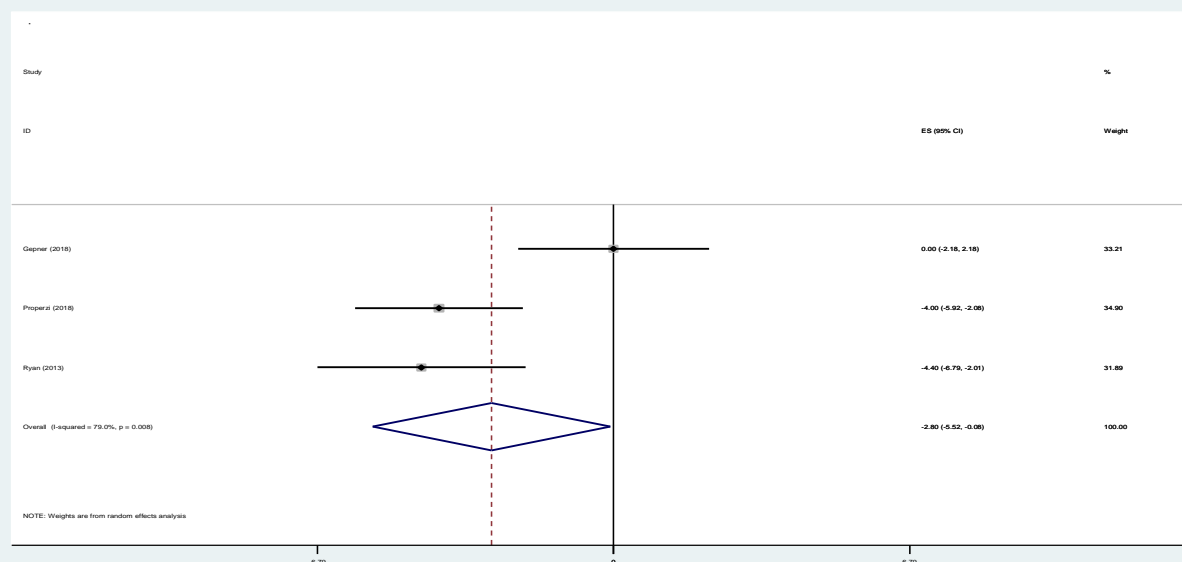

Mean differences were pooled using random effects meta-analysis. Squares indicate effect size for each study (mean difference between intervention and control group), with extended lines representing 95% confidence intervals (95% CIs). Diamonds indicate the overall weighted mean effect size.  $I^2$  indicates between-study heterogeneity. Detailed study characteristics can be found in Table 1 (main manuscript).

**Figure S22: Forest plot for overall hepatic fat mass**

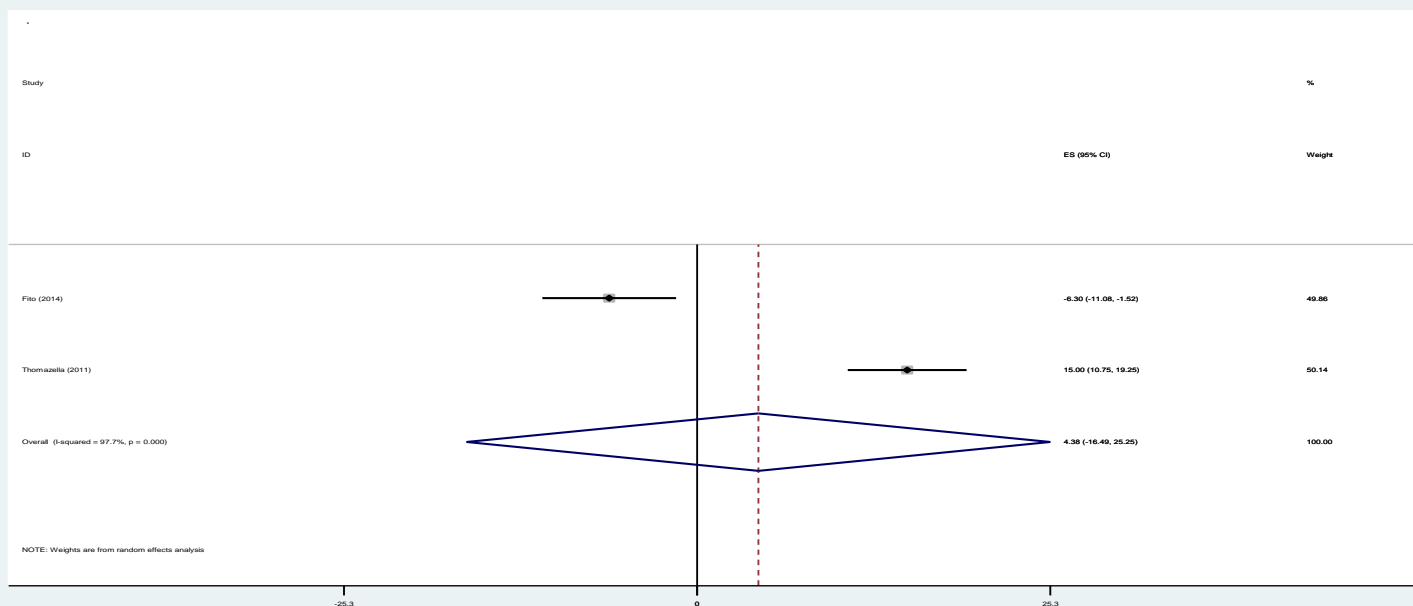

Mean differences were pooled using random effects meta-analysis. Squares indicate effect size for each study (mean difference between intervention and control group), with extended lines representing 95% confidence intervals (95% CIs). Diamonds indicate the overall weighted mean effect size.  $I^2$  indicates between-study heterogeneity. Detailed study characteristics can be found in Table 1 (main manuscript).

**Figure S23: Forest plot for overall blood oxidised LDL-cholesterol**

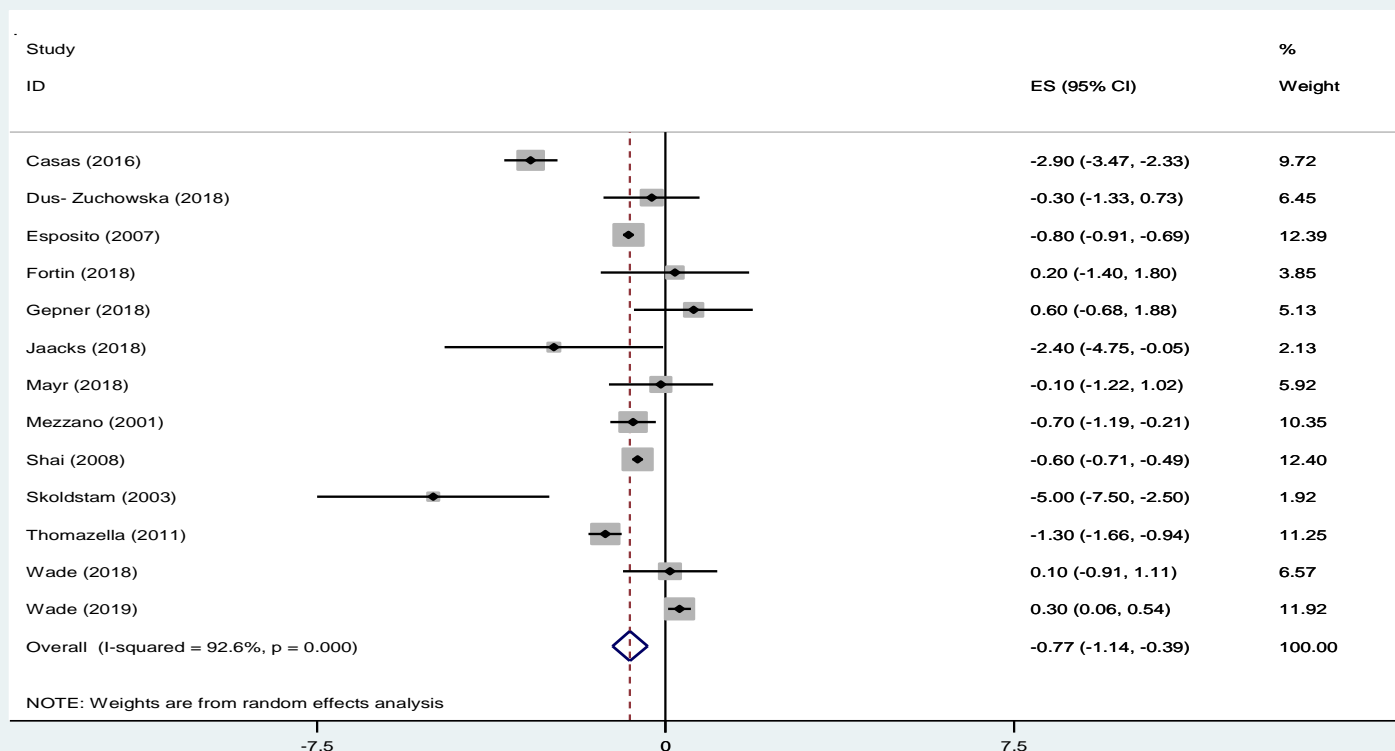

Mean differences were pooled using random effects meta-analysis. Squares indicate effect size for each study (mean difference between intervention and control group), with extended lines representing 95% confidence intervals (95% CIs). Diamonds indicate the overall weighted mean effect size.  $I^2$  indicates between-study heterogeneity. Detailed study characteristics can be found in Table 1 (main manuscript).

**Figure S24: Forest plot for overall blood C-reactive protein**

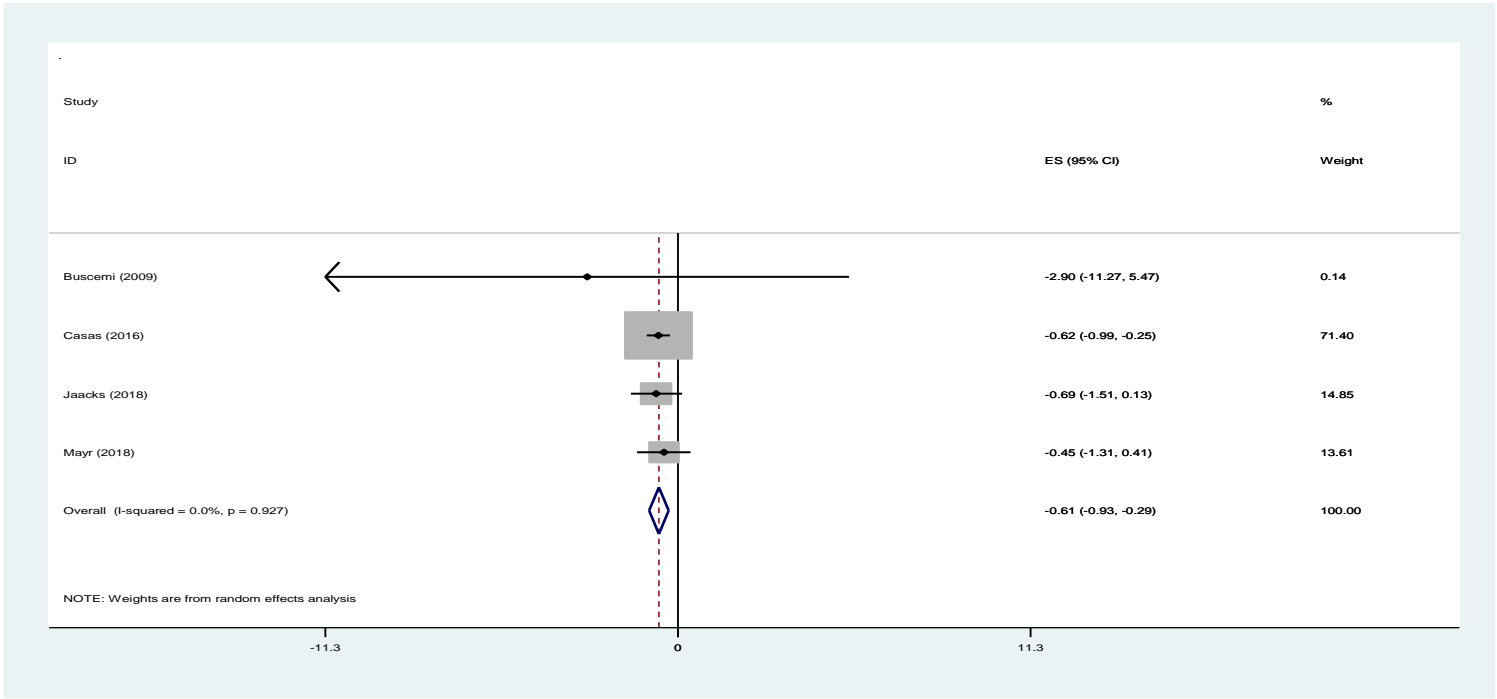

Mean differences were pooled using random effects meta-analysis. Squares indicate effect size for each study (mean difference between intervention and control group), with extended lines representing 95% confidence intervals (95% CIs). Diamonds indicate the overall weighted mean effect size.  $I^2$  indicates between-study heterogeneity. Detailed study characteristics can be found in Table 1 (main manuscript).

Figure S25: Forest plot for overall blood interleukin-6

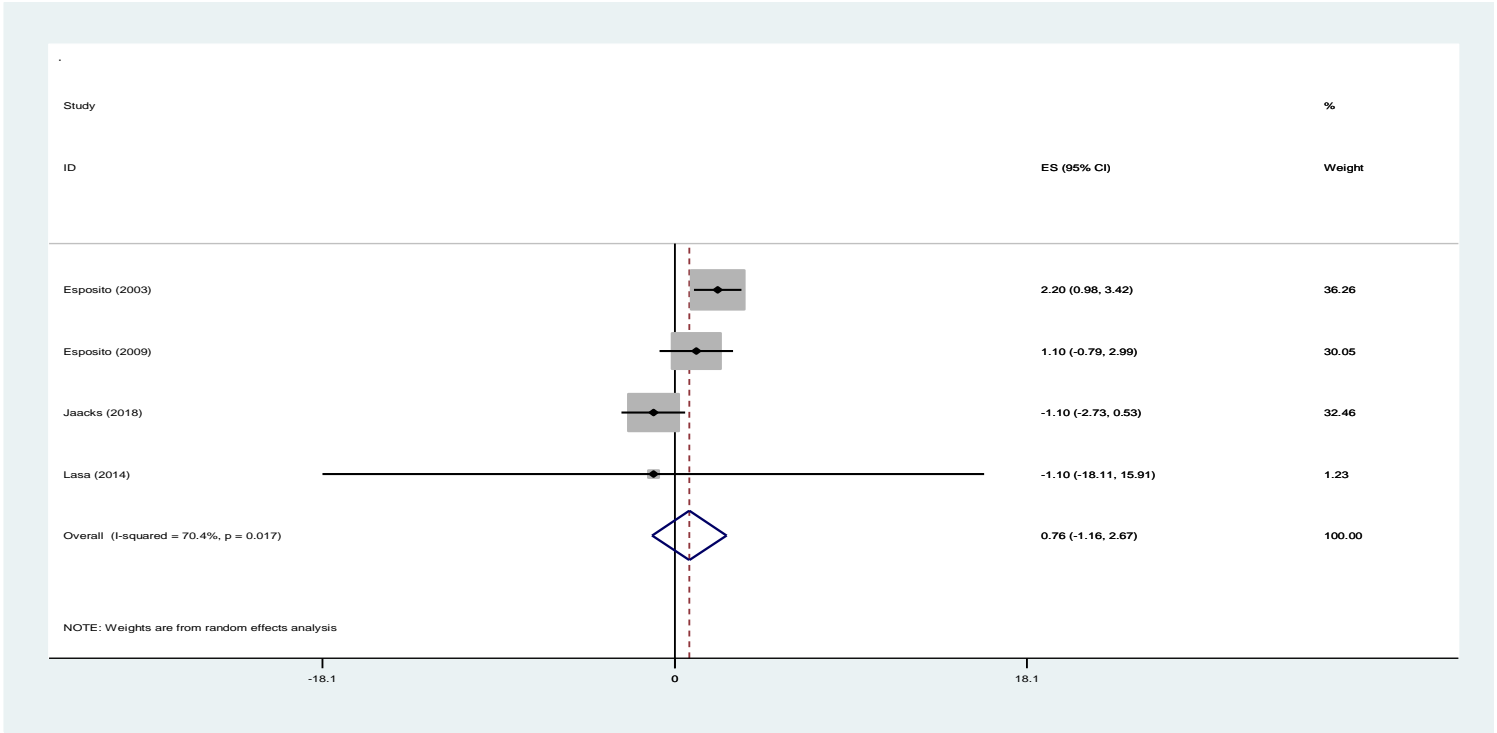

Mean differences were pooled using random effects meta-analysis. Squares indicate effect size for each study (mean difference between intervention and control group), with extended lines representing 95% confidence intervals (95% CIs). Diamonds indicate the overall weighted mean effect size.  $I^2$  indicates between-study heterogeneity. Detailed study characteristics can be found in Table 1 (main manuscript).

Figure S26: Forest plot for overall blood adiponectin

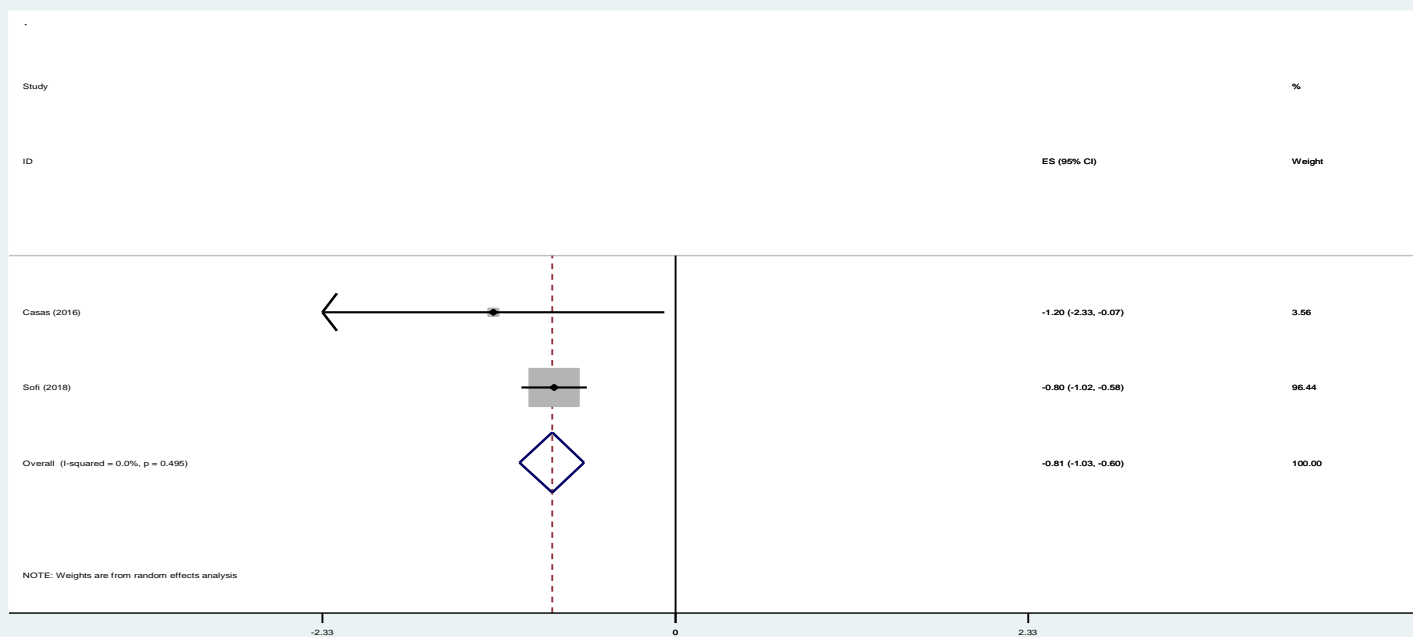

Mean differences were pooled using random effects meta-analysis. Squares indicate effect size for each study (mean difference between intervention and control group), with extended lines representing 95% confidence intervals (95% CIs). Diamonds indicate the overall weighted mean effect size.  $I^2$  indicates between-study heterogeneity. Detailed study characteristics can be found in Table 1 (main manuscript).

**Figure S27: Forest plot for overall blood tumour necrosis factor-a**

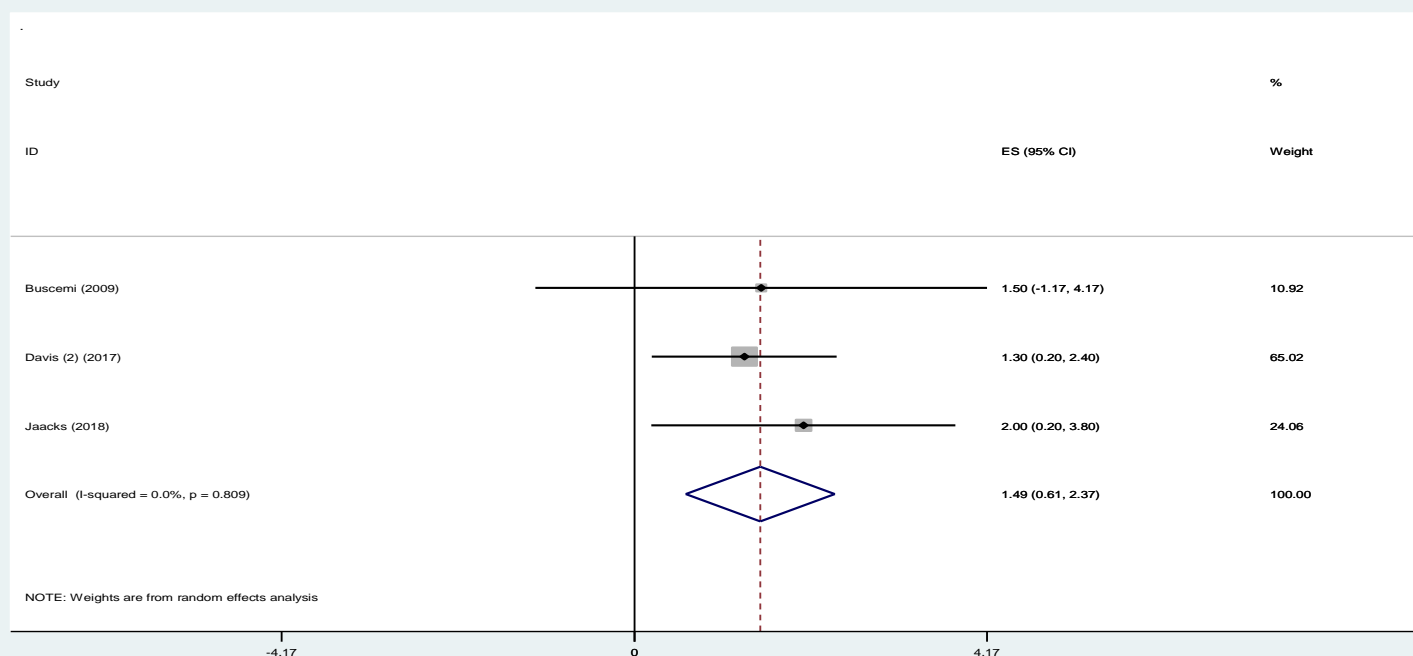

Mean differences were pooled using random effects meta-analysis. Squares indicate effect size for each study (mean difference between intervention and control group), with extended lines representing 95% confidence intervals (95% CIs). Diamonds indicate the overall weighted mean effect size.  $I^2$  indicates between-study heterogeneity. Detailed study characteristics can be found in Table 1 (main manuscript).

**Figure S28: Forest plot for overall flow mediated dilatation**

**Supplementary Figures S29–S36.** Forest plots of controlled trials evaluating the effect of the Mediterranean diet on metabolic syndrome-related comorbidities

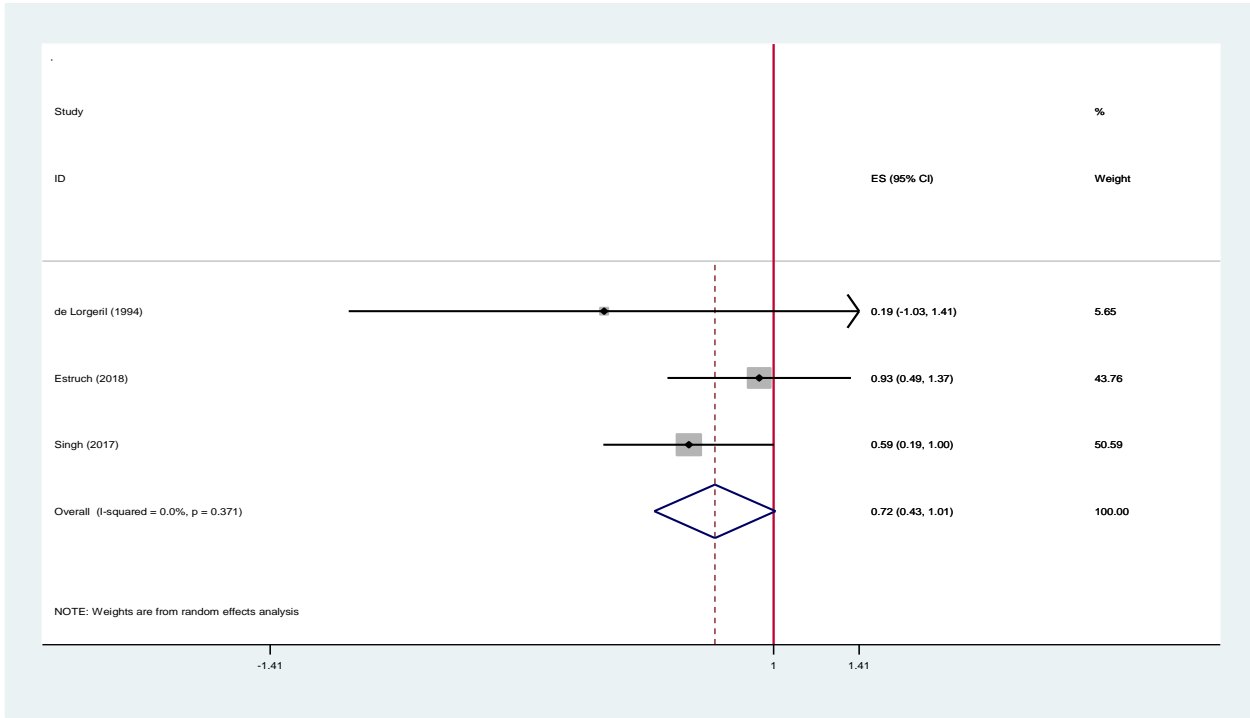

Risk ratios were calculated and pooled using random effects meta-analysis. Squares indicate relative risk of the Mediterranean diet compared to control treatment, with extended lines representing 95% confidence intervals (95% CIs). Diamonds indicate the overall weighted mean relative risk.  $I^2$  indicates between-study heterogeneity. Detailed study characteristics can be found in Table 1 (main manuscript).

**Figure S29: Forest plot for cardiovascular disease mortality risk**

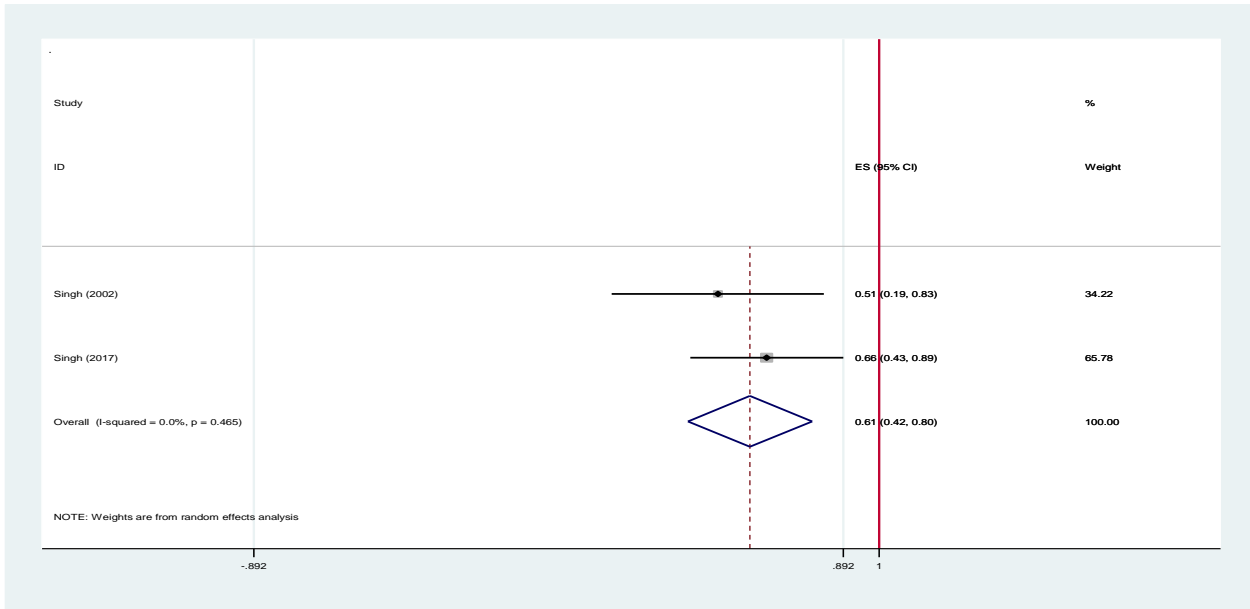

Risk ratios were calculated and pooled using random effects meta-analysis. Squares indicate relative risk of the Mediterranean diet compared to control treatment, with extended lines representing 95% confidence intervals (95% CIs). Diamonds indicate the overall weighted mean relative risk.  $I^2$  indicates between-study heterogeneity. Detailed study characteristics can be found in Table 1 (main manuscript).

**Figure S30: Forest plot for cardiovascular disease incidence risk**

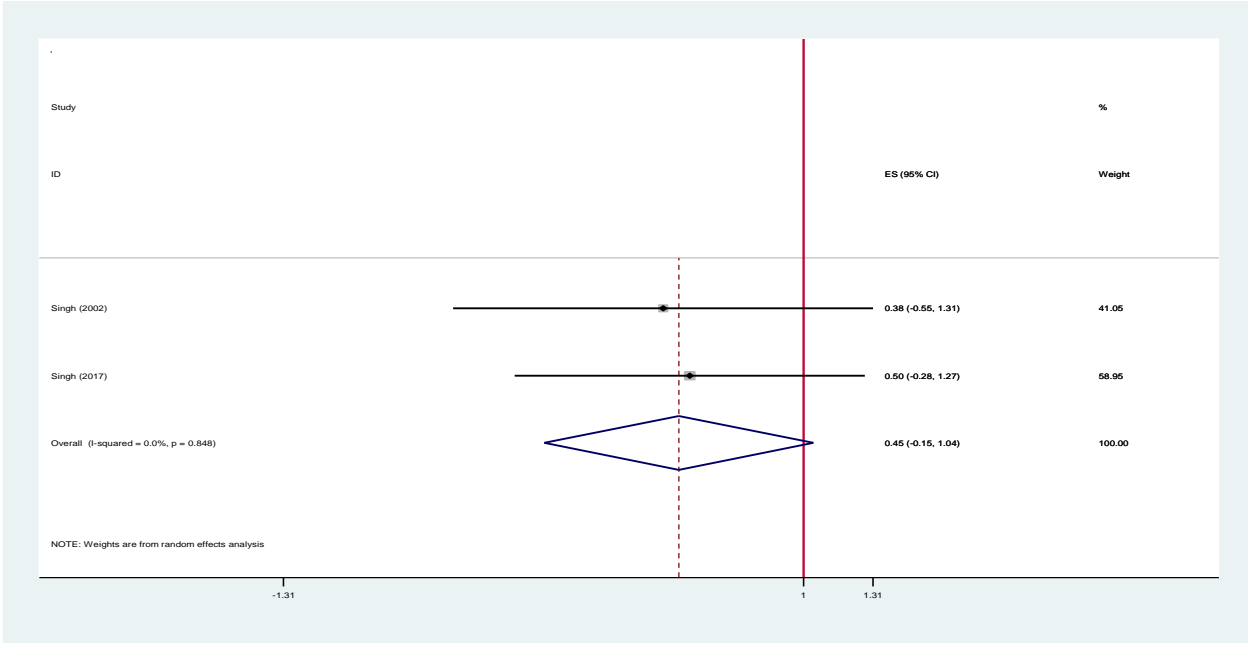

Risk ratios were calculated and pooled using random effects meta-analysis. Squares indicate relative risk of the Mediterranean diet compared to control treatment, with extended lines representing 95% confidence intervals (95% CIs). Diamonds indicate the overall weighted mean relative risk.  $I^2$  indicates between-study heterogeneity. Detailed study characteristics can be found in Table 1 (main manuscript).

Figure S31: Forest plot for sudden cardiac death risk

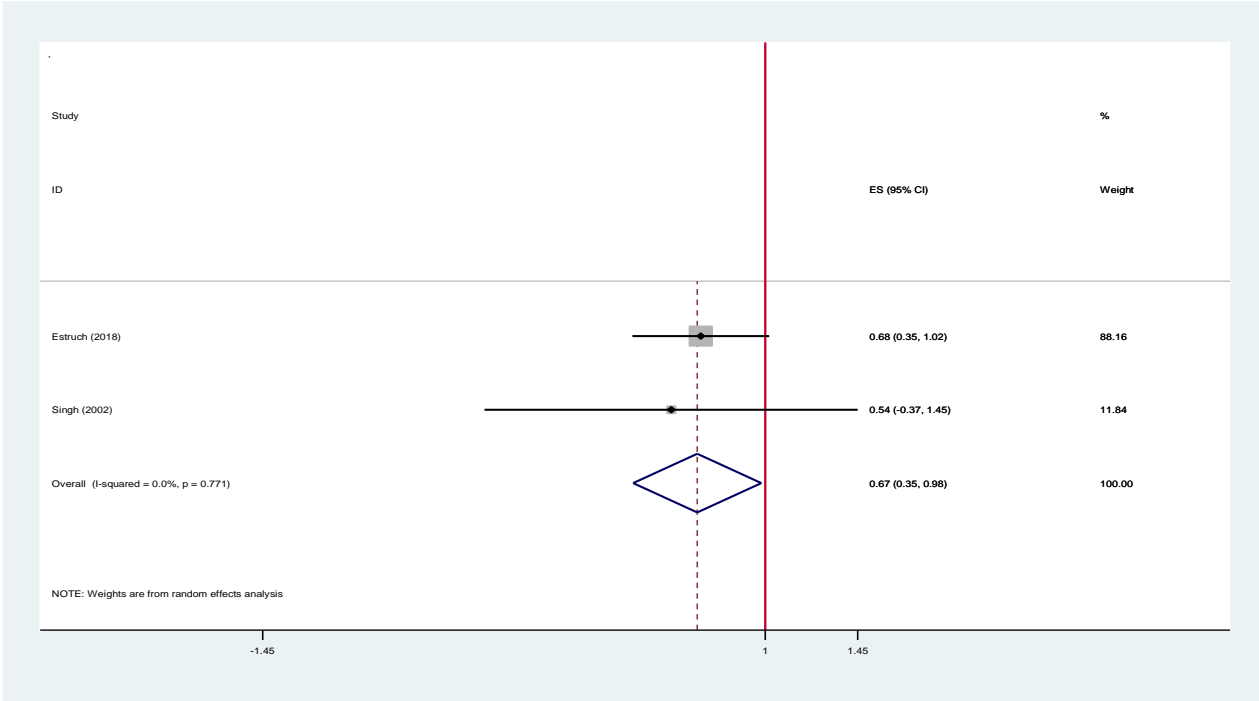

Risk ratios were calculated and pooled using random effects meta-analysis. Squares indicate relative risk of the Mediterranean diet compared to control treatment, with extended lines representing 95% confidence intervals (95% CIs). Diamonds indicate the overall weighted mean relative risk.  $I^2$  indicates between-study heterogeneity. Detailed study characteristics can be found in Table 1 (main manuscript).

Figure S32: Forest plot for stroke incidence risk

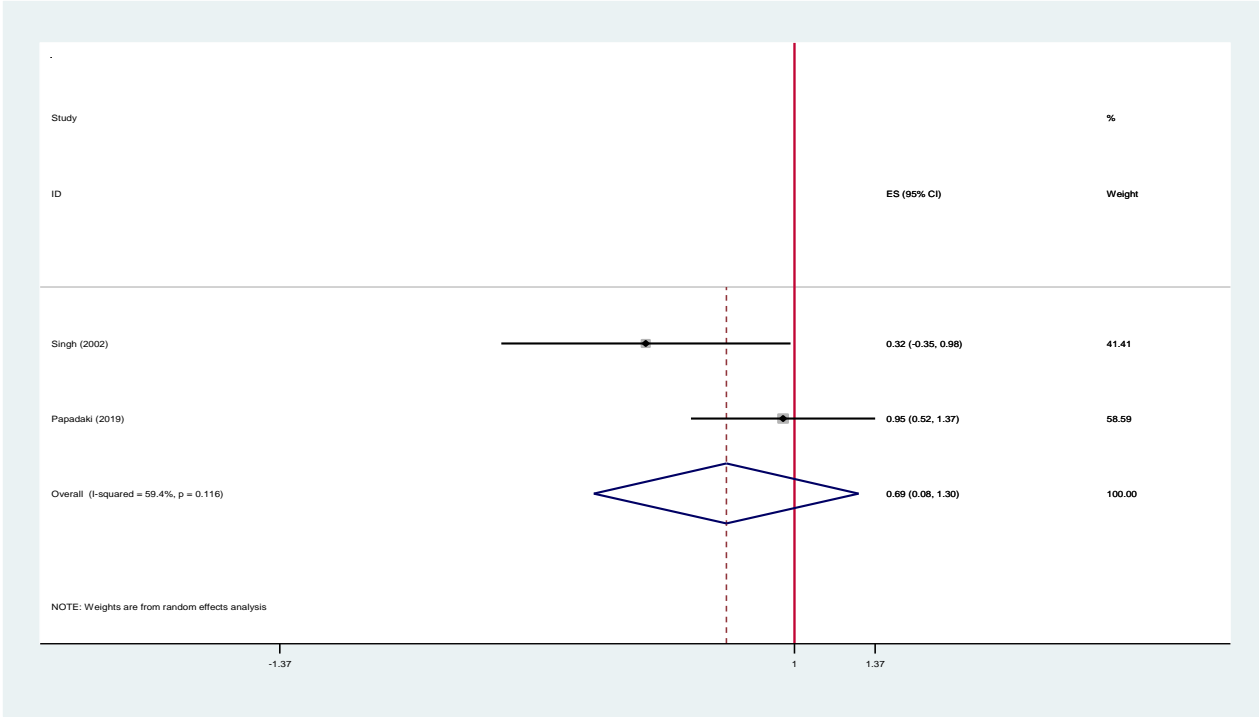

Risk ratios were calculated and pooled using random effects meta-analysis. Squares indicate relative risk of the Mediterranean diet compared to control treatment, with extended lines representing 95% confidence intervals (95% CIs). Diamonds indicate the overall weighted mean relative risk.  $I^2$  indicates between-study heterogeneity. Detailed study characteristics can be found in Table 1 (main manuscript).

**Figure S33: Forest plot for heart failure incidence risk**

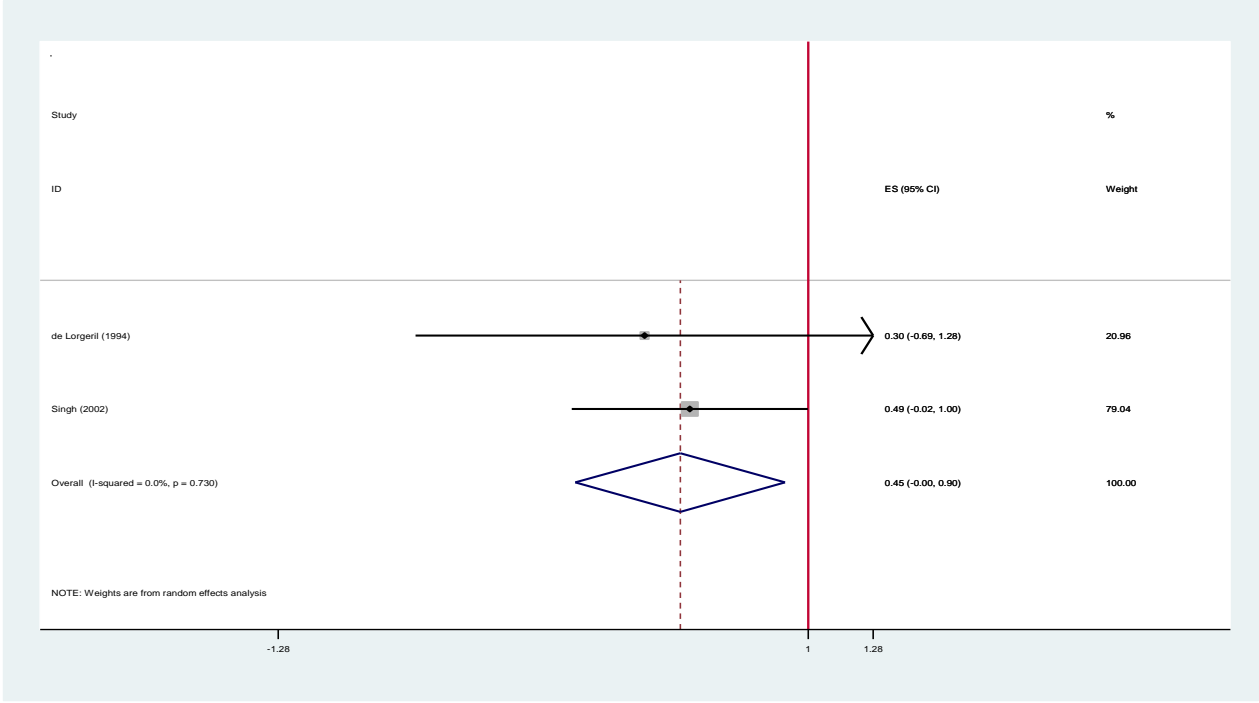

Risk ratios were calculated and pooled using random effects meta-analysis. Squares indicate relative risk of the Mediterranean diet compared to control treatment, with extended lines representing 95% confidence intervals (95% CIs). Diamonds indicate the overall weighted mean relative risk.  $I^2$  indicates between-study heterogeneity. Detailed study characteristics can be found in Table 1 (main manuscript).

**Figure S34: Forest plot for non-fatal myocardial infarction risk**



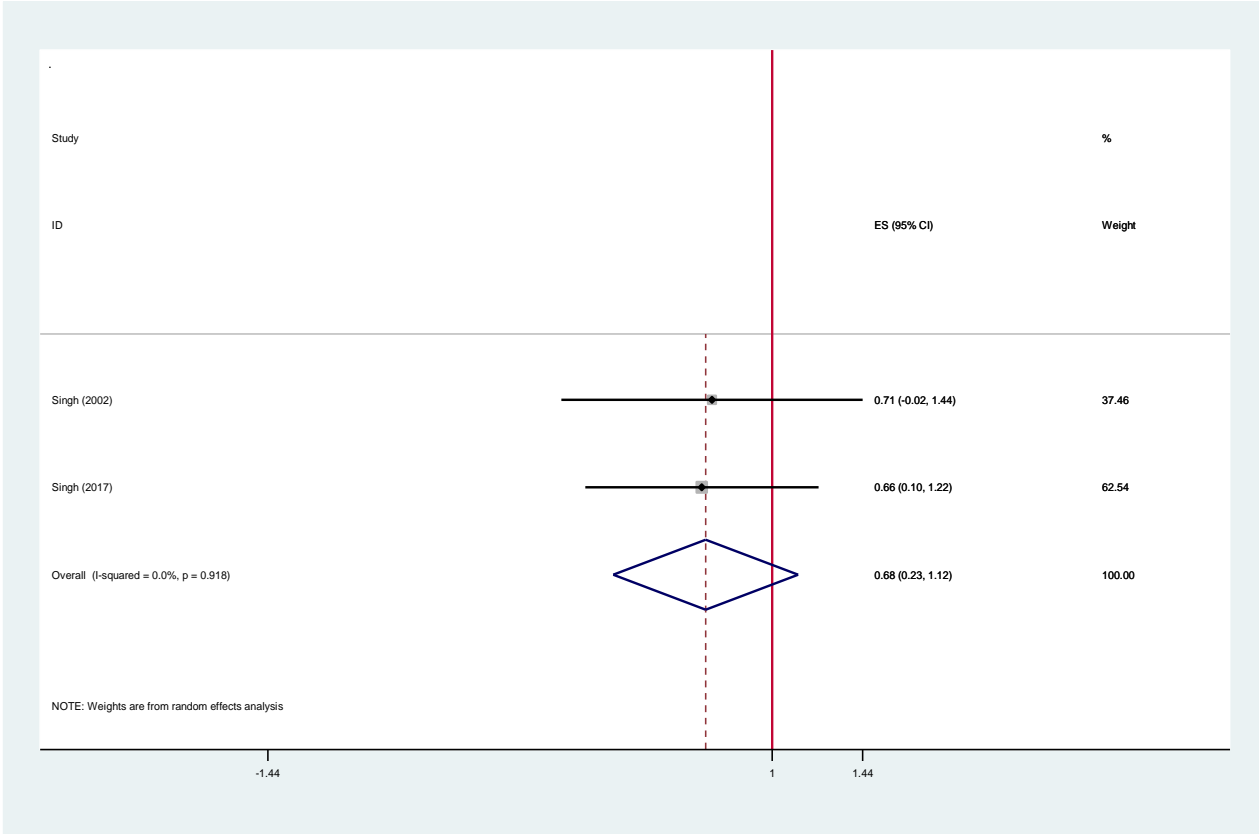

Risk ratios were calculated and pooled using random effects meta-analysis. Squares indicate relative risk of the Mediterranean diet compared to control treatment, with extended lines representing 95% confidence intervals (95% CIs). Diamonds indicate the overall weighted mean relative risk.  $I^2$  indicates between-study heterogeneity. Detailed study characteristics can be found in Table 1 (main manuscript).

Figure S35: Forest plot for fatal myocardial infarction risk

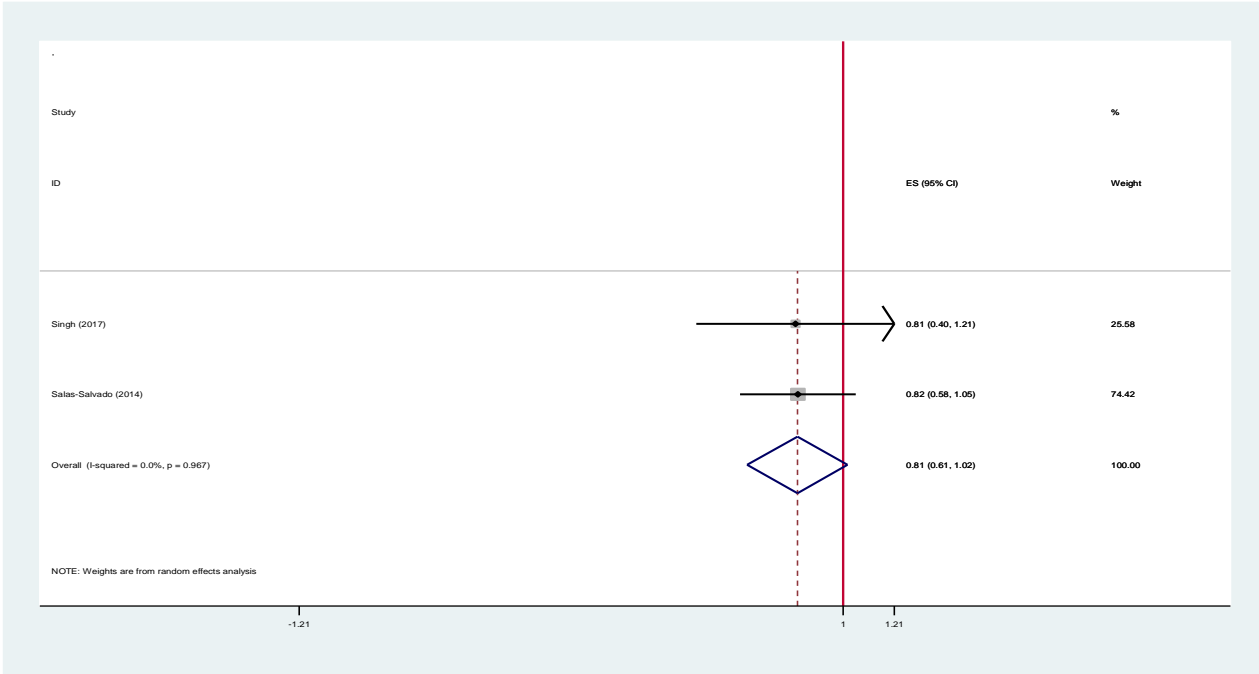

Risk ratios were calculated and pooled using random effects meta-analysis. Squares indicate relative risk of the Mediterranean diet compared to control treatment, with extended lines representing 95% confidence intervals (95% CIs). Diamonds indicate the overall weighted mean relative risk.  $I^2$  indicates between-study heterogeneity. Detailed study characteristics can be found in Table 1 (main manuscript).

Figure S36: Forest plot for type 2 diabetes incidence

**Supplementary Table S10.** Summary of the findings on metabolic syndrome-related comorbidities (between-group differences) from the papers (and/or outcomes) not included in the pooled analysis

|                          | Stroke                                                               | Angina Pectoris                   | MI                                                                                                                                                                    | Pre-diabetes incidence  |
|--------------------------|----------------------------------------------------------------------|-----------------------------------|-----------------------------------------------------------------------------------------------------------------------------------------------------------------------|-------------------------|
| Estruch et al. 2018 [53] | -                                                                    | -                                 | Incidence:<br>MD (EVOO) vs. CG: HR, 0.82 [CI 0.52 to 1.30]<br>MD (nuts) vs. CG: HR, 0.76 [CI 0.47 to 1.25]<br>MD (combined) vs. CG: HR, 0.80 [CI 0.53 to 1.21]        | -                       |
| Singh et al. 2002 [93]*  | Mortality: 0.4 vs. 0.6%, P=0.650                                     | Incidence: 7 vs. 11%,<br>P=0.0133 | -                                                                                                                                                                     | -                       |
| Singh et al. 2017 [94]*  | -                                                                    | -                                 | -                                                                                                                                                                     | -21.5 vs. 8.5%, P<0.001 |
|                          | Cancer                                                               |                                   | Breast cancer incidence                                                                                                                                               |                         |
| Singh et al. 2002 [93]*  | Incidence: 0.4 vs. 0.4%, P=1.000<br>Mortality: 0.3 vs. 0.2%, P=1.000 |                                   | -                                                                                                                                                                     |                         |
| Toledo et al. 2015 [104] |                                                                      | -                                 | MD (EVOO) vs. CG: HR, 0.38 [CI 0.16 to 0.87];<br>P=0.020<br>MD (nuts) vs. CG: HR, 0.62 [CI 0.29 to 1.36]; P=0.240<br>MD (combined) vs. CG: HR, 0.49 [CI 0.25 to 0.94] |                         |

CG, control group; CI, confidence intervals; EVOO, extra virgin olive oil; HR, hazard ratio; MD, Mediterranean diet; MI, myocardial infarction; T2D, type 2 diabetes.

\* Percentage comparison data refer to between-group differences in proportion of participants at post-intervention.

**Supplementary Figures S37–S41.** Forest plots of controlled trials evaluating the effect of the Mediterranean diet on metabolic syndrome and/or related comorbidity treatment

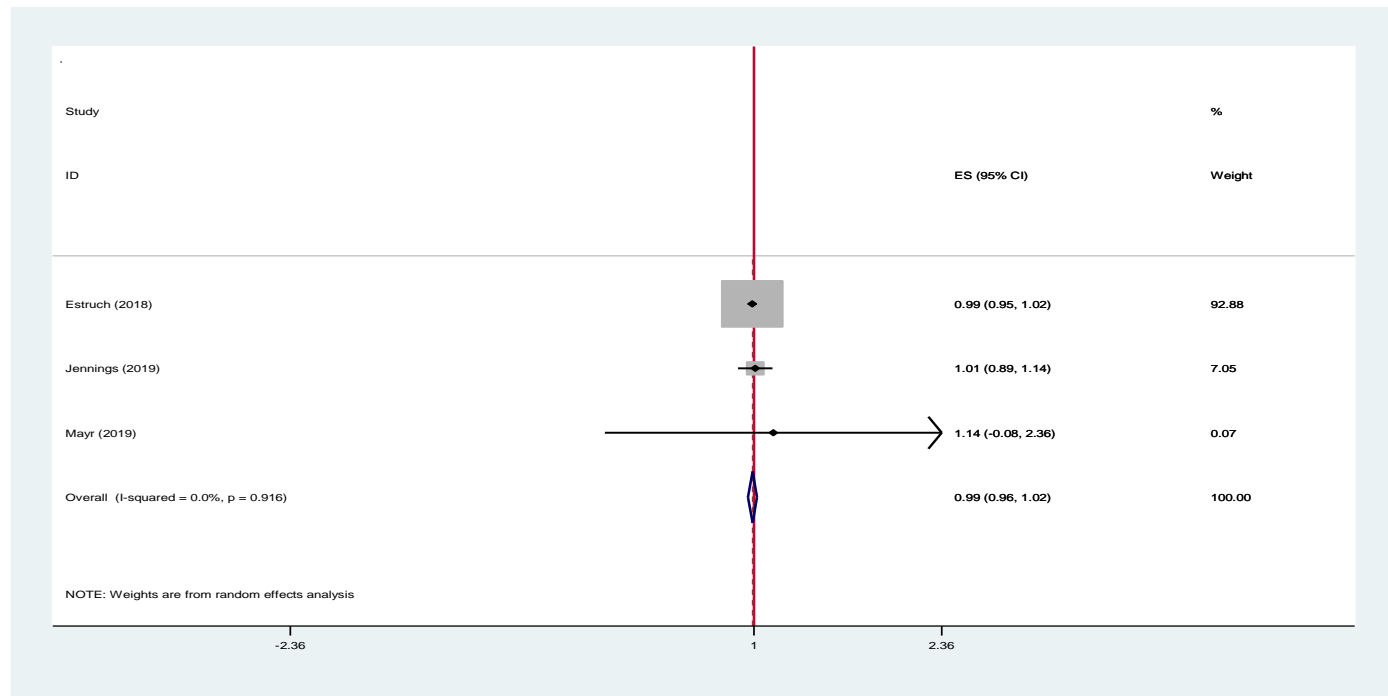

Risk ratios were calculated and pooled using random effects meta-analysis. Squares indicate relative risk of the Mediterranean diet compared to control treatment, with extended lines representing 95% confidence intervals (95% CIs). Diamonds indicate the overall weighted mean relative risk.  $I^2$  indicates between-study heterogeneity. Detailed study characteristics can be found in Table 1 (main manuscript).

**Figure S37: Forest plot for use of blood pressure lowering drugs**

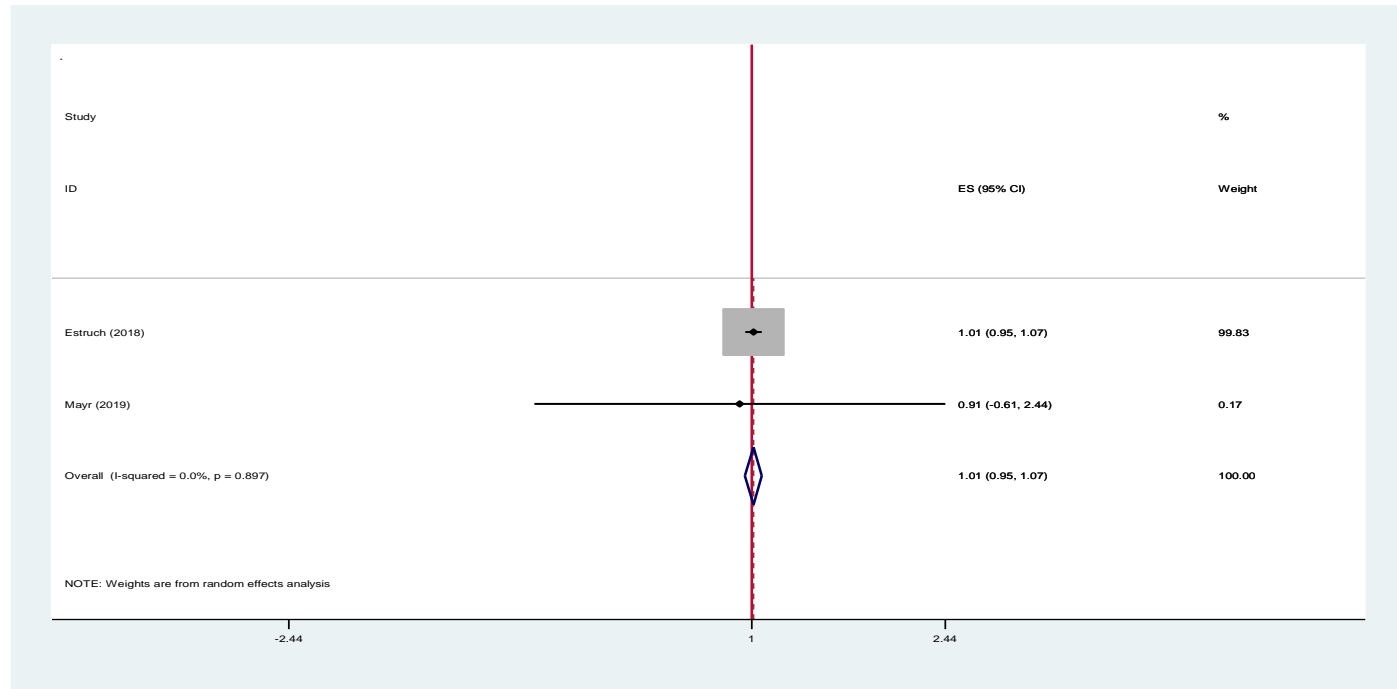

Risk ratios were calculated and pooled using random effects meta-analysis. Squares indicate relative risk of the Mediterranean diet compared to control treatment, with extended lines representing 95% confidence intervals (95% CIs). Diamonds indicate the overall weighted mean relative risk.  $I^2$  indicates between-study heterogeneity. Detailed study characteristics can be found in Table 1 (main manuscript).

**Figure S38: Forest plot for use of lipid-lowering agents**

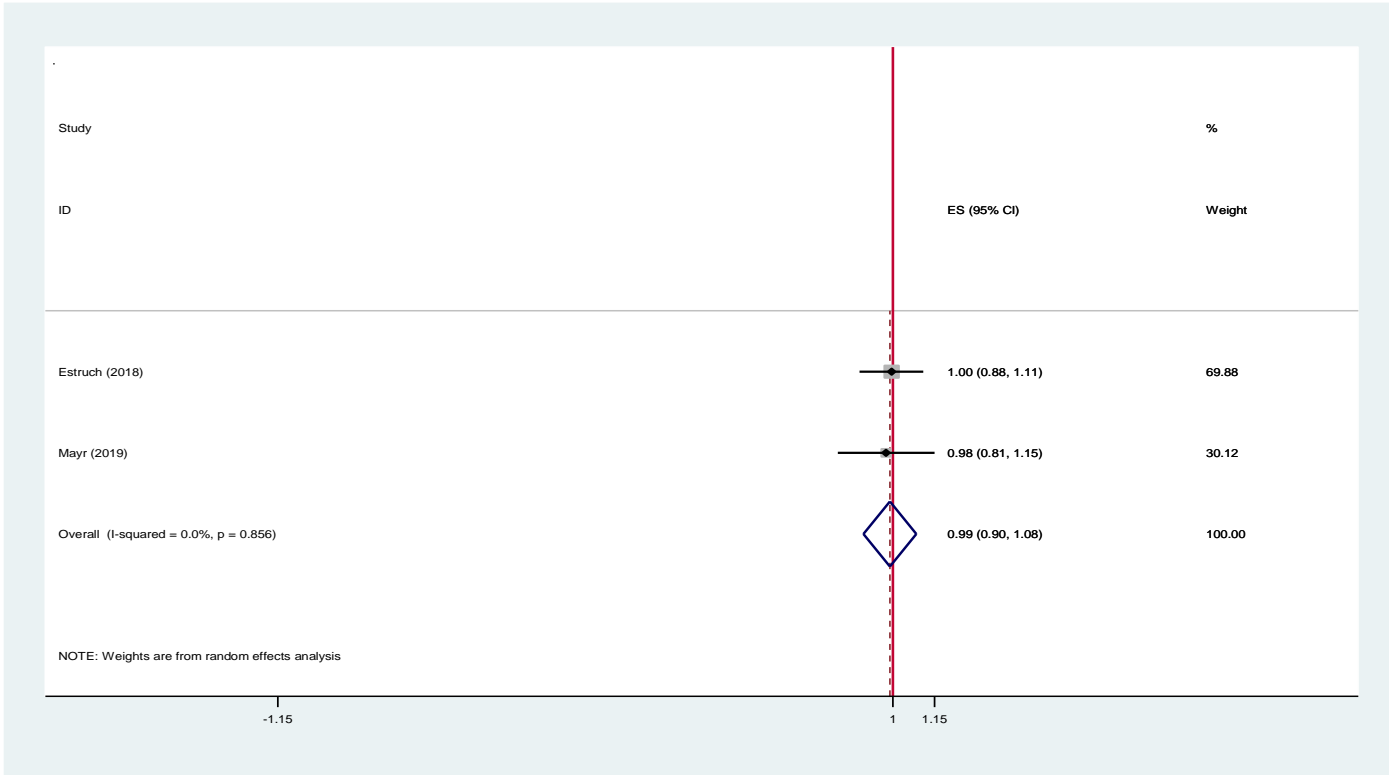

Risk ratios were calculated and pooled using random effects meta-analysis. Squares indicate relative risk of the Mediterranean diet compared to control treatment, with extended lines representing 95% confidence intervals (95% CIs). Diamonds indicate the overall weighted mean relative risk.  $I^2$  indicates between-study heterogeneity. Detailed study characteristics can be found in Table 1 (main manuscript).

Figure S39: Forest plot for use of anti-platelet therapy

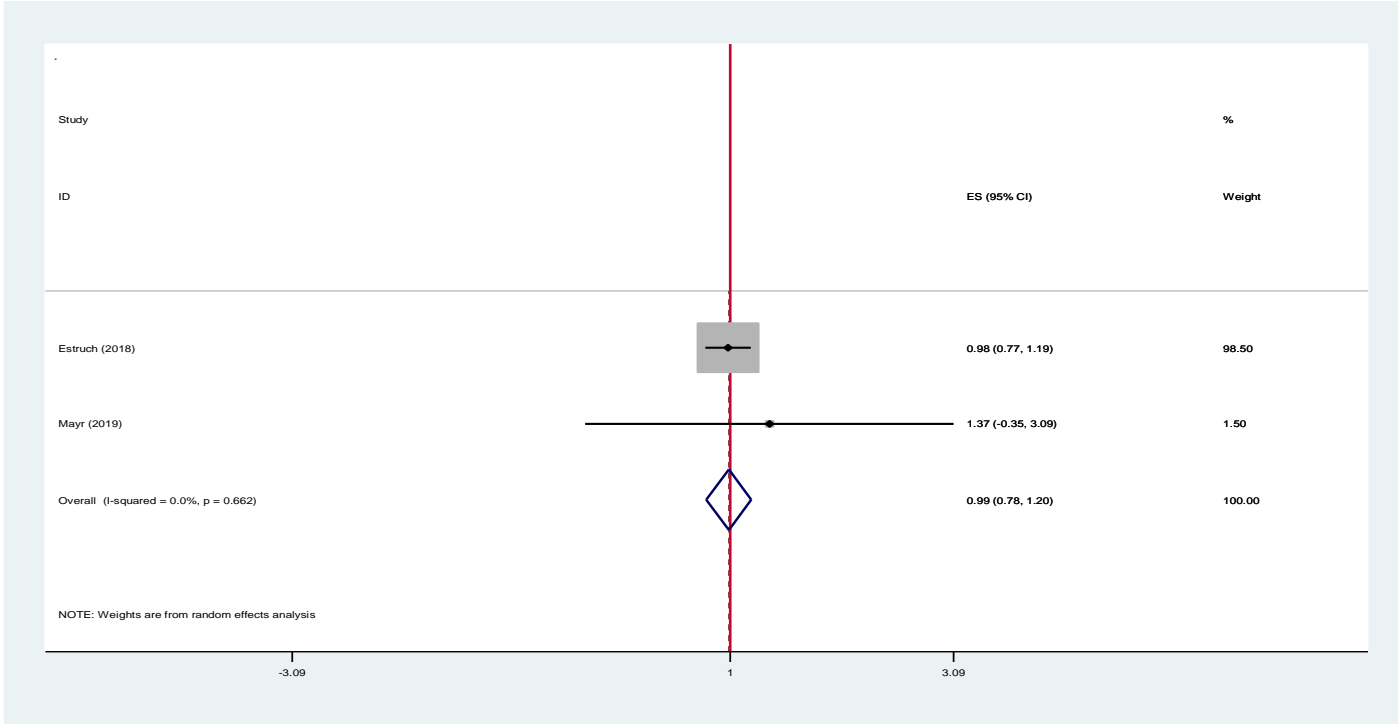

Risk ratios were calculated and pooled using random effects meta-analysis. Squares indicate relative risk of the Mediterranean diet compared to control treatment, with extended lines representing 95% confidence intervals (95% CIs). Diamonds indicate the overall weighted mean relative risk.  $I^2$  indicates between-study heterogeneity. Detailed study characteristics can be found in Table 1 (main manuscript).

Figure S40: Forest plot for use of insulin

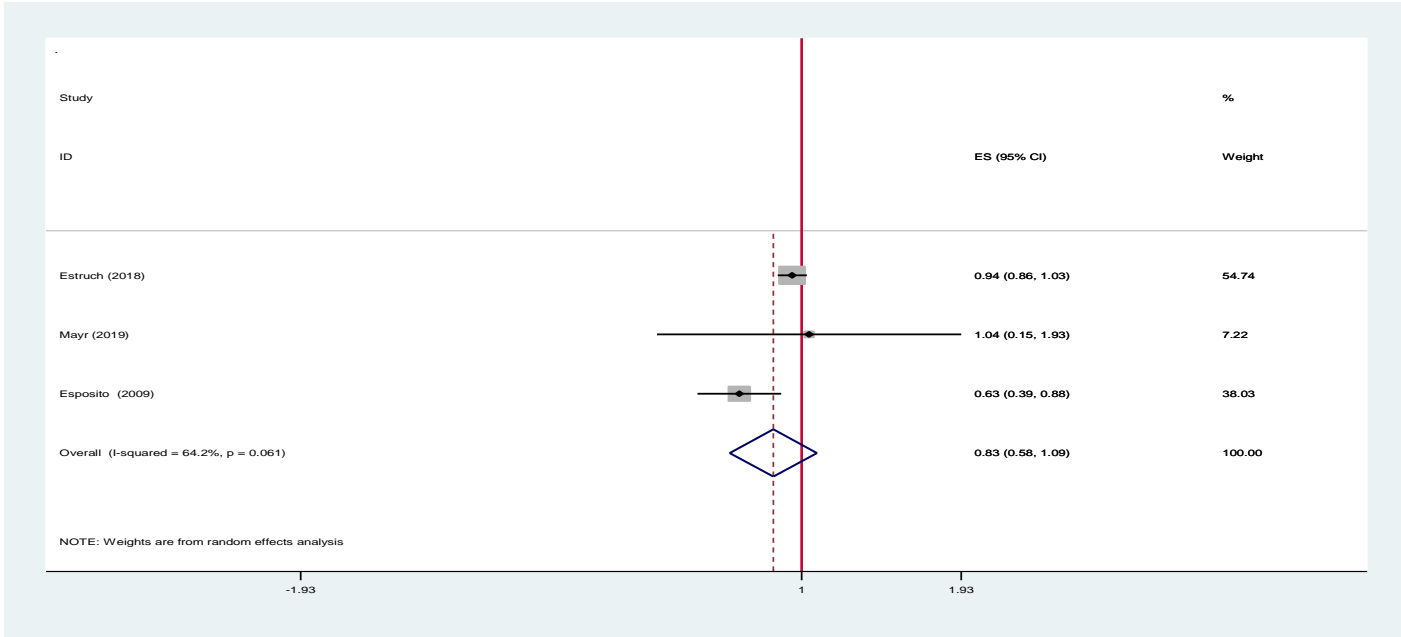

Risk ratios were calculated and pooled using random effects meta-analysis. Squares indicate relative risk of the Mediterranean diet compared to control treatment, with extended lines representing 95% confidence intervals (95% CIs). Diamonds indicate the overall weighted mean relative risk.  $I^2$  indicates between-study heterogeneity. Detailed study characteristics can be found in Table 1 (main manuscript).

**Figure S41: Forest plot for use of oral antidiabetic agents**

**Supplementary Table S11.** Summary of the findings on metabolic syndrome and/or related comorbidity treatment (between-group differences) from the papers (and/or outcomes) not included in the pooled analysis

|                                                                  | <b>Need for antihyperglycemic drug<br/>therapy</b>            | <b>Use of blood<br/>pressure-lowering drugs</b>               | <b>Use of lipid-lowering<br/>agents</b>                          | <b>Use of nitrates</b> | <b>Use of verapamil<br/>(β-blocker)</b> | <b>Use of disopyramide<br/>(irregular heartbeat)</b> |
|------------------------------------------------------------------|---------------------------------------------------------------|---------------------------------------------------------------|------------------------------------------------------------------|------------------------|-----------------------------------------|------------------------------------------------------|
| Esposito et al. 2014 (follow-up<br>of Esposito et al. 2009) [48] | MD vs. CG: HR= 0.68, 95% CI 0.50-0.89; P<br><0.001            | -                                                             | -                                                                | -                      | -                                       | -                                                    |
| Shai et al. 2008 [91]*                                           | No change, no difference between groups (no<br>data provided) | No change, no difference between<br>groups (no data provided) | No change, no difference<br>between groups (no data<br>provided) | -                      | -                                       | -                                                    |
| Singh et al. 2002 [93]*                                          | -                                                             | -                                                             | -                                                                | -20% vs. -7%, P<0.0001 | -7% vs. -2%, P<0.001                    | -4% vs. 0%, P<0.0001                                 |

CG, control group; CI, confidence intervals; HR, hazard ratio; MD, Mediterranean diet.

\* Percentage comparison data refer to between-groups changes in the proportion of participants from baseline to post-intervention

|                       | Random sequence generation (selection bias) | Allocation concealment (selection bias) | Blinding of participants and personnel (performance bias) | Blinding of outcome assessment (detection bias) | Incomplete outcome data (attrition bias) | Selective reporting (reporting bias) | Other bias |
|-----------------------|---------------------------------------------|-----------------------------------------|-----------------------------------------------------------|-------------------------------------------------|------------------------------------------|--------------------------------------|------------|
| Almanza-Aguilera 2018 | ?                                           | ?                                       | ?                                                         | ?                                               | ?                                        | ?                                    | ?          |
| Alvarez-Perez 2016    | ?                                           | ?                                       | ?                                                         | ?                                               | ?                                        | ?                                    | ?          |
| Ambring 2004          | ?                                           | ?                                       | ?                                                         | ?                                               | ?                                        | ?                                    | ?          |
| Austel 2015           | ?                                           | ?                                       | ?                                                         | ?                                               | ?                                        | ?                                    | ?          |
| Babio 2014            | ?                                           | ?                                       | ?                                                         | ?                                               | ?                                        | ?                                    | ?          |
| Bajerska 2018         | ?                                           | ?                                       | ?                                                         | ?                                               | ?                                        | ?                                    | ?          |
| Bemelmans 2000        | ?                                           | ?                                       | ?                                                         | ?                                               | ?                                        | ?                                    | ?          |
| Braakhuis 2017        | ?                                           | ?                                       | ?                                                         | ?                                               | ?                                        | ?                                    | ?          |
| Buscemi 2009          | ?                                           | ?                                       | ?                                                         | ?                                               | ?                                        | ?                                    | ?          |
| Carruba 2006          | ?                                           | ?                                       | ?                                                         | ?                                               | ?                                        | ?                                    | ?          |
| Casas 2016            | ?                                           | ?                                       | ?                                                         | ?                                               | ?                                        | ?                                    | ?          |
| Davis 2017            | ?                                           | ?                                       | ?                                                         | ?                                               | ?                                        | ?                                    | ?          |
| Davis 2017a           | ?                                           | ?                                       | ?                                                         | ?                                               | ?                                        | ?                                    | ?          |
| de Lorgeil 1994       | ?                                           | ?                                       | ?                                                         | ?                                               | ?                                        | ?                                    | ?          |
| Dus-Zchowska 2018     | ?                                           | ?                                       | ?                                                         | ?                                               | ?                                        | ?                                    | ?          |
| Elhayany 2010         | ?                                           | ?                                       | ?                                                         | ?                                               | ?                                        | ?                                    | ?          |
| Entwistle 2018        | ?                                           | ?                                       | ?                                                         | ?                                               | ?                                        | ?                                    | ?          |
| Esposito 2003         | ?                                           | ?                                       | ?                                                         | ?                                               | ?                                        | ?                                    | ?          |
| Esposito 2004         | ?                                           | ?                                       | ?                                                         | ?                                               | ?                                        | ?                                    | ?          |
| Esposito 2007         | ?                                           | ?                                       | ?                                                         | ?                                               | ?                                        | ?                                    | ?          |
| Esposito 2009         | ?                                           | ?                                       | ?                                                         | ?                                               | ?                                        | ?                                    | ?          |
| Esposito 2014         | ?                                           | ?                                       | ?                                                         | ?                                               | ?                                        | ?                                    | ?          |
| Estruch 2006          | ?                                           | ?                                       | ?                                                         | ?                                               | ?                                        | ?                                    | ?          |
| Estruch 2018          | ?                                           | ?                                       | ?                                                         | ?                                               | ?                                        | ?                                    | ?          |
| Estruch 2019          | ?                                           | ?                                       | ?                                                         | ?                                               | ?                                        | ?                                    | ?          |
| Fito 2014             | ?                                           | ?                                       | ?                                                         | ?                                               | ?                                        | ?                                    | ?          |
| Fortin 2018           | ?                                           | ?                                       | ?                                                         | ?                                               | ?                                        | ?                                    | ?          |
| Fraser 2008           | ?                                           | ?                                       | ?                                                         | ?                                               | ?                                        | ?                                    | ?          |
| Gepner 2018           | ?                                           | ?                                       | ?                                                         | ?                                               | ?                                        | ?                                    | ?          |
| Hjerkinn 2006         | ?                                           | ?                                       | ?                                                         | ?                                               | ?                                        | ?                                    | ?          |
| Jaacks 2018           | ?                                           | ?                                       | ?                                                         | ?                                               | ?                                        | ?                                    | ?          |
| Jennings 2019         | ?                                           | ?                                       | ?                                                         | ?                                               | ?                                        | ?                                    | ?          |
| Katsagoni 2018        | ?                                           | ?                                       | ?                                                         | ?                                               | ?                                        | ?                                    | ?          |
| Lasa 2014             | ?                                           | ?                                       | ?                                                         | ?                                               | ?                                        | ?                                    | ?          |
| Lee 2015              | ?                                           | ?                                       | ?                                                         | ?                                               | ?                                        | ?                                    | ?          |
| Maijo 2018            | ?                                           | ?                                       | ?                                                         | ?                                               | ?                                        | ?                                    | ?          |
| Maiorino 2016         | ?                                           | ?                                       | ?                                                         | ?                                               | ?                                        | ?                                    | ?          |
| Mayr 2018             | ?                                           | ?                                       | ?                                                         | ?                                               | ?                                        | ?                                    | ?          |
| Mayr 2019             | ?                                           | ?                                       | ?                                                         | ?                                               | ?                                        | ?                                    | ?          |
| McManus 2001          | ?                                           | ?                                       | ?                                                         | ?                                               | ?                                        | ?                                    | ?          |
| Meir 2019             | ?                                           | ?                                       | ?                                                         | ?                                               | ?                                        | ?                                    | ?          |
| Mezzano 2001          | ?                                           | ?                                       | ?                                                         | ?                                               | ?                                        | ?                                    | ?          |
| Michielsen 2019       | ?                                           | ?                                       | ?                                                         | ?                                               | ?                                        | ?                                    | ?          |
| Misciagna 2017        | ?                                           | ?                                       | ?                                                         | ?                                               | ?                                        | ?                                    | ?          |
| Ortner 2016           | ?                                           | ?                                       | ?                                                         | ?                                               | ?                                        | ?                                    | ?          |
| Osella 2018           | ?                                           | ?                                       | ?                                                         | ?                                               | ?                                        | ?                                    | ?          |
| Paniagua 2007         | ?                                           | ?                                       | ?                                                         | ?                                               | ?                                        | ?                                    | ?          |
| Papadaki 2019         | ?                                           | ?                                       | ?                                                         | ?                                               | ?                                        | ?                                    | ?          |
| Papandreou 2012       | ?                                           | ?                                       | ?                                                         | ?                                               | ?                                        | ?                                    | ?          |
| Parcina 2015          | ?                                           | ?                                       | ?                                                         | ?                                               | ?                                        | ?                                    | ?          |
| Properzi 2018         | ?                                           | ?                                       | ?                                                         | ?                                               | ?                                        | ?                                    | ?          |
| Ryan 2013             | ?                                           | ?                                       | ?                                                         | ?                                               | ?                                        | ?                                    | ?          |
| Salas-Salvado 2014    | ?                                           | ?                                       | ?                                                         | ?                                               | ?                                        | ?                                    | ?          |
| Sala-Vila 2014        | ?                                           | ?                                       | ?                                                         | ?                                               | ?                                        | ?                                    | ?          |
| Shai 2008             | ?                                           | ?                                       | ?                                                         | ?                                               | ?                                        | ?                                    | ?          |
| Shai 2010             | ?                                           | ?                                       | ?                                                         | ?                                               | ?                                        | ?                                    | ?          |
| Singh 2002            | ?                                           | ?                                       | ?                                                         | ?                                               | ?                                        | ?                                    | ?          |
| Singh 2017            | ?                                           | ?                                       | ?                                                         | ?                                               | ?                                        | ?                                    | ?          |
| Skoldstam 2003        | ?                                           | ?                                       | ?                                                         | ?                                               | ?                                        | ?                                    | ?          |
| Skouroliahou 2018     | ?                                           | ?                                       | ?                                                         | ?                                               | ?                                        | ?                                    | ?          |
| Sofi 2018             | ?                                           | ?                                       | ?                                                         | ?                                               | ?                                        | ?                                    | ?          |
| Sola 2011             | ?                                           | ?                                       | ?                                                         | ?                                               | ?                                        | ?                                    | ?          |
| Stachowska 2006       | ?                                           | ?                                       | ?                                                         | ?                                               | ?                                        | ?                                    | ?          |
| Stornio 2017          | ?                                           | ?                                       | ?                                                         | ?                                               | ?                                        | ?                                    | ?          |
| Toledo 2013           | ?                                           | ?                                       | ?                                                         | ?                                               | ?                                        | ?                                    | ?          |
| Toledo 2015           | ?                                           | ?                                       | ?                                                         | ?                                               | ?                                        | ?                                    | ?          |
| Troscid 2009          | ?                                           | ?                                       | ?                                                         | ?                                               | ?                                        | ?                                    | ?          |
| Tutino 2018           | ?                                           | ?                                       | ?                                                         | ?                                               | ?                                        | ?                                    | ?          |
| Vincent-Baudry 2005   | ?                                           | ?                                       | ?                                                         | ?                                               | ?                                        | ?                                    | ?          |
| Wade 2018             | ?                                           | ?                                       | ?                                                         | ?                                               | ?                                        | ?                                    | ?          |
| Wade 2019             | ?                                           | ?                                       | ?                                                         | ?                                               | ?                                        | ?                                    | ?          |
| Wardle 2000           | ?                                           | ?                                       | ?                                                         | ?                                               | ?                                        | ?                                    | ?          |

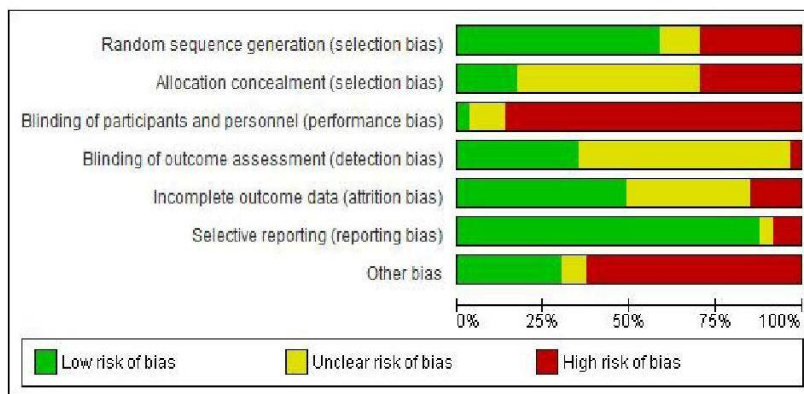

**Supplementary Figure S42.** Risk of bias for papers reporting a randomised controlled trial

**Supplementary Figures S43–S83.** Funnel plots and Egger test of studies evaluating the effect of the Mediterranean diet on anthropometric, blood pressure, biochemical, insulin resistance, oxidative stress, inflammatory and endothelial function markers related to the metabolic syndrome, metabolic syndrome-related comorbidities and metabolic syndrome and/or related comorbidity treatment (SE, standard error)

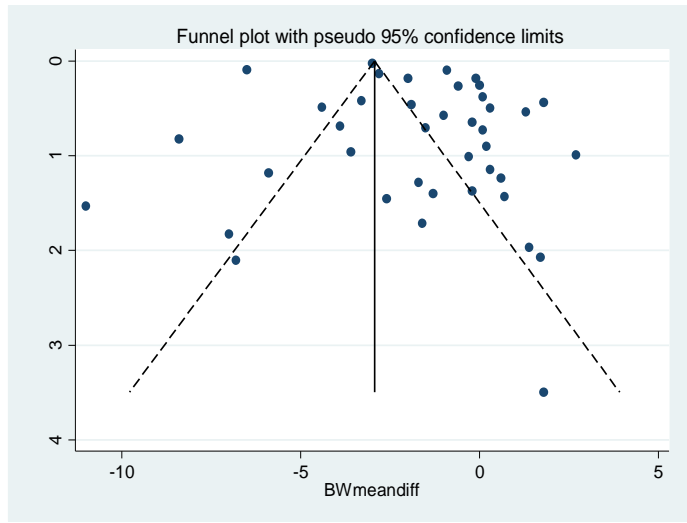

Egger's test P value= 0.112

**Figure S43:** Funnel plot of effect of the Mediterranean diet on body weight

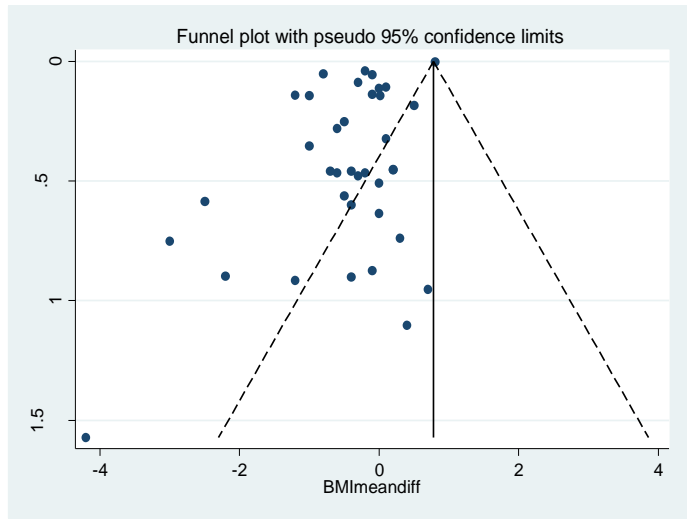

Egger's test P value= <0.001

**Figure S44:** Funnel plot of effect of the Mediterranean diet on body mass index

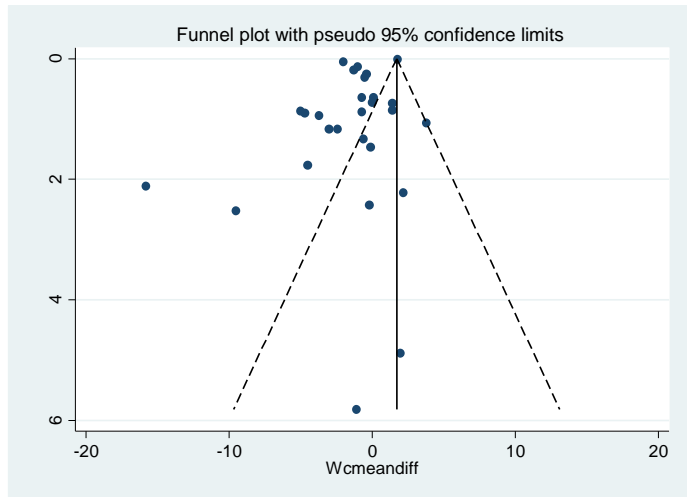

Egger's test P value= 0.026

**Figure S45:** Funnel plot of effect of the Mediterranean diet on waist circumference



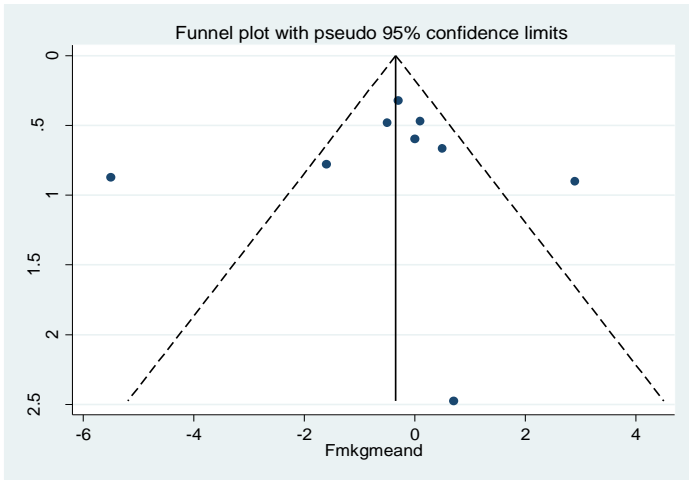

Egger's test P value= 0.804

**Figure S46:** Funnel plot of effect of the Mediterranean diet on total fat mass

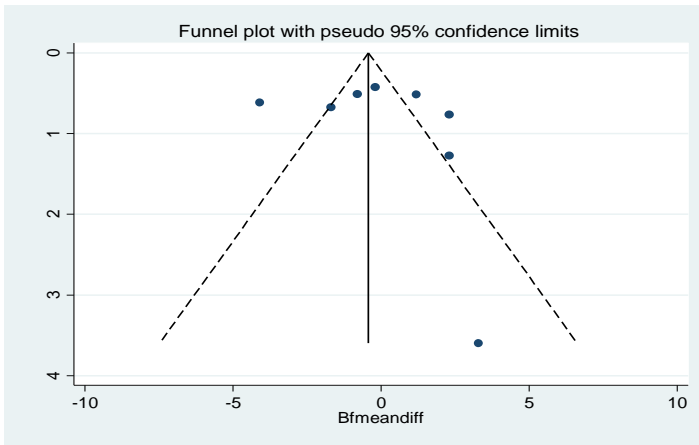

Egger's test P value= 0.643

**Figure S47:** Funnel plot of effect of the Mediterranean diet on total body fat %

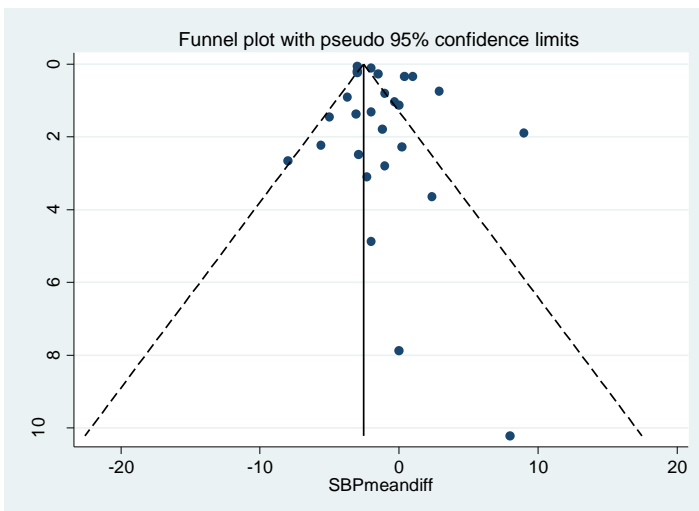

Egger's test P value= 0.039

**Figure S48:** Funnel plot of effect of the Mediterranean diet on systolic blood pressure

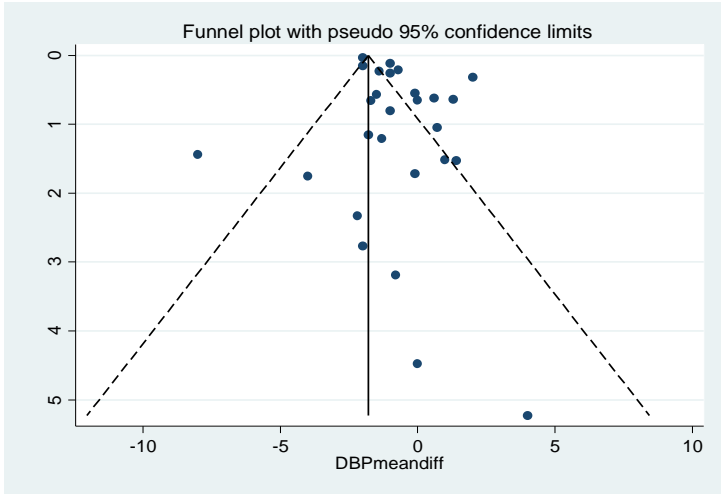

Egger's test P value= 0.011

**Figure S49:** Funnel plot of effect of the Mediterranean diet on diastolic blood pressure

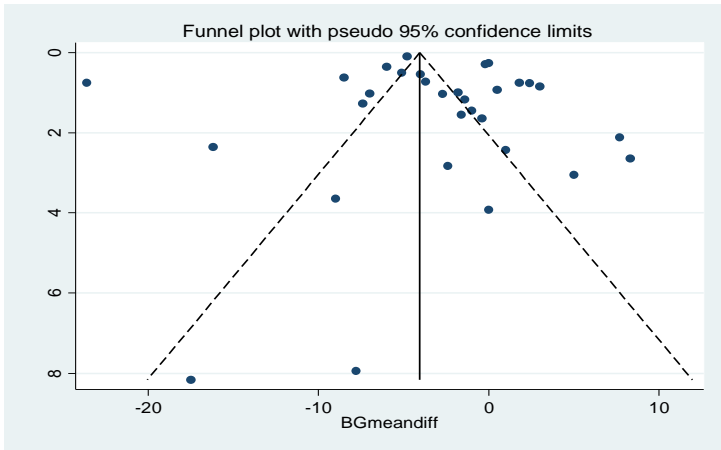

Egger's test P value= 0.464

**Figure S50:** Funnel plot of effect of the Mediterranean diet on blood glucose concentrations

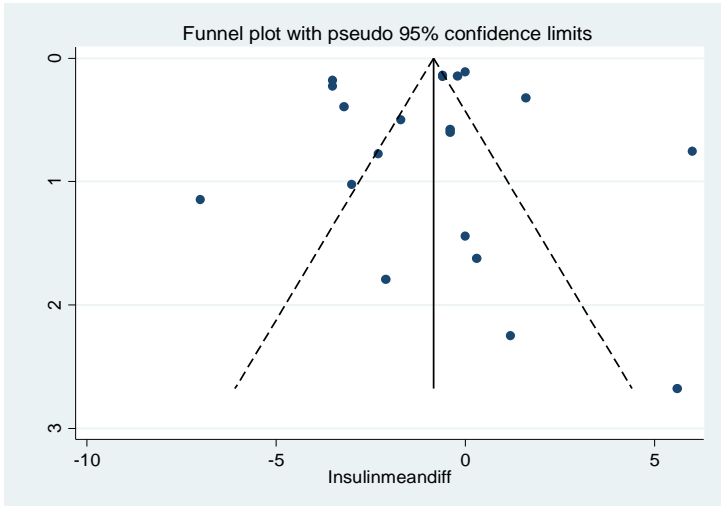

Egger's test P value= 0.737

**Figure S51:** Funnel plot of effect of the Mediterranean diet on insulin concentrations

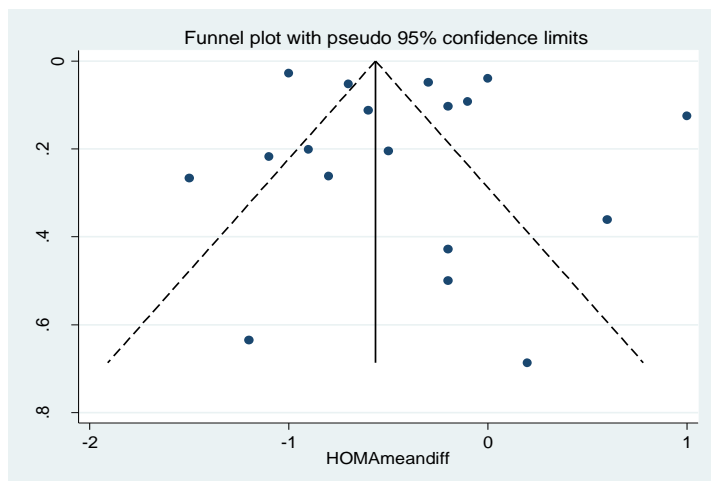

Egger's test P value= 0.360

**Figure S52: Funnel plot of effect of the Mediterranean diet on HOMA-IR**

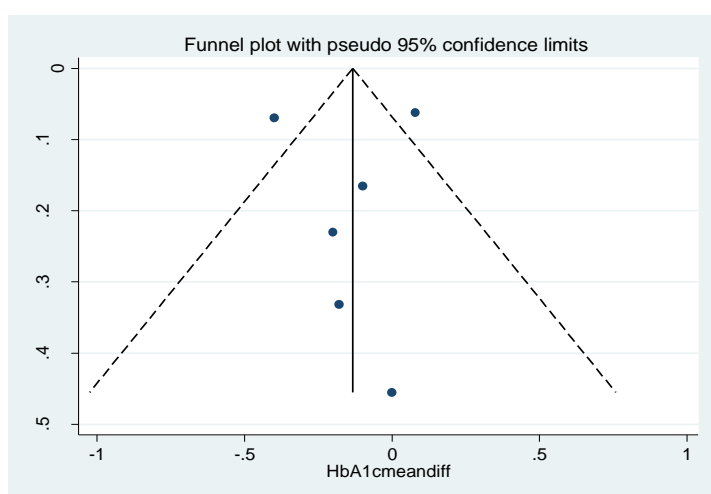

Egger's test P value= 0.928

**Figure S53: Funnel plot of effect of the Mediterranean diet on HbA1c concentrations**

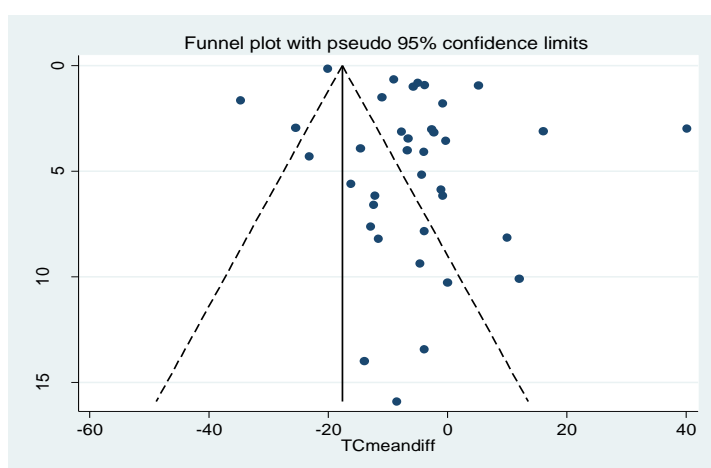

Egger's test P value= 0.001

**Figure S54: Funnel plot of effect of the Mediterranean diet on total cholesterol concentrations**

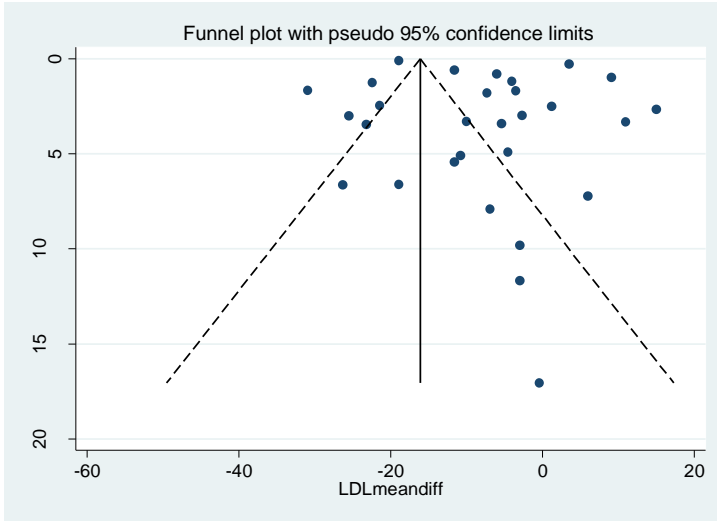

Egger's test P value= 0.089

**Figure S55: Funnel plot of effect of the Mediterranean diet on LDL-cholesterol concentrations**

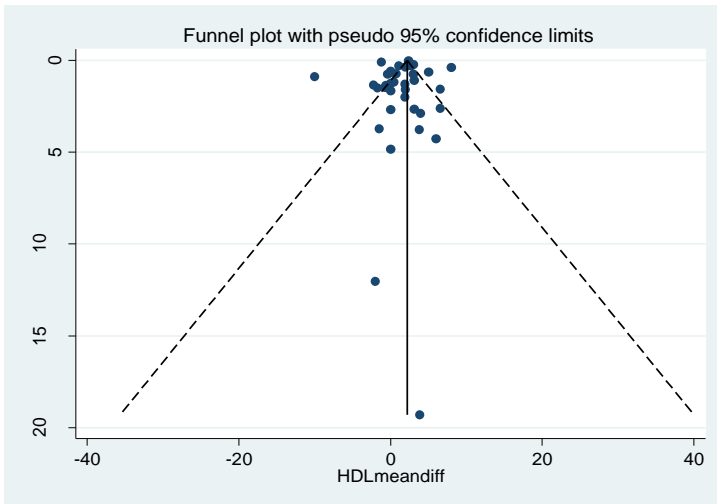

Egger's test P value= 0.326

**Figure S56: Funnel plot of effect of the Mediterranean diet on HDL-cholesterol concentrations**

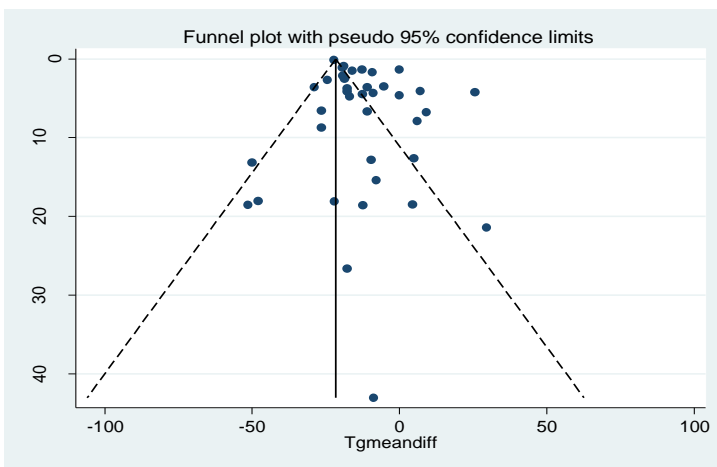

Egger's test P value= <0.001

**Figure S57: Funnel plot of effect of the Mediterranean diet on triglyceride concentrations**

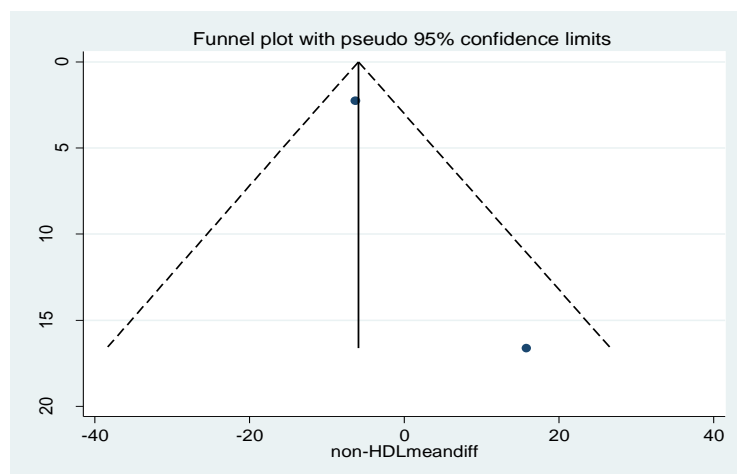

**Figure S58:** Funnel plot of effect of the Mediterranean diet on non-HDL-cholesterol concentrations

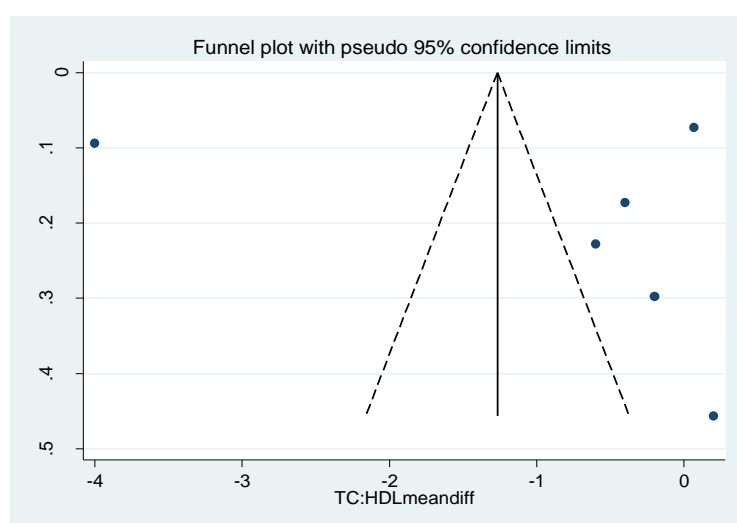

Egger's test P value= 0.872

**Figure S59:** Funnel plot of effect of the Mediterranean diet on total:HDL-cholesterol ratio

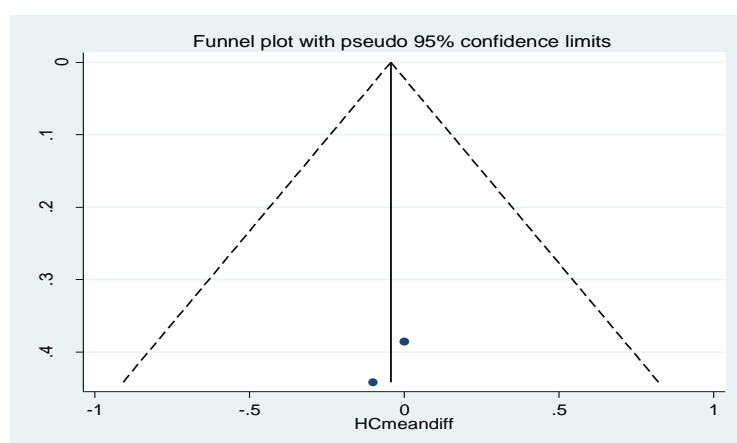

**Figure S60:** Funnel plot of effect of the Mediterranean diet on homocysteine concentrations

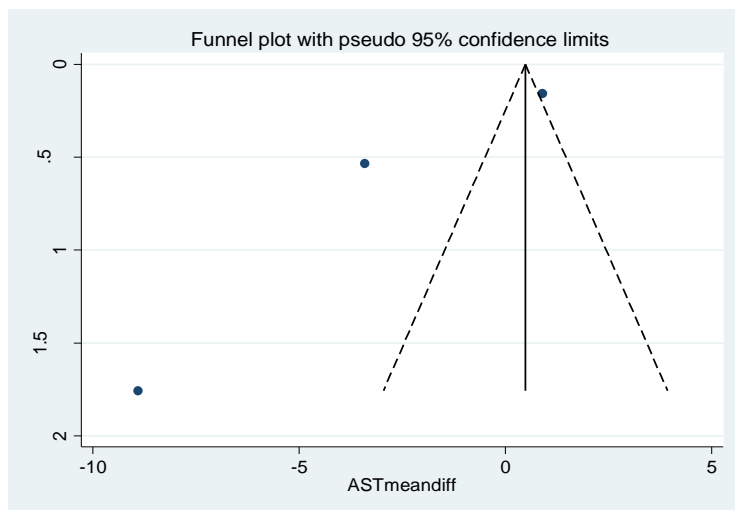

Egger's test P value= 0.200

**Figure S61:** Funnel plot of effect of the Mediterranean diet on aspartame transaminase concentrations

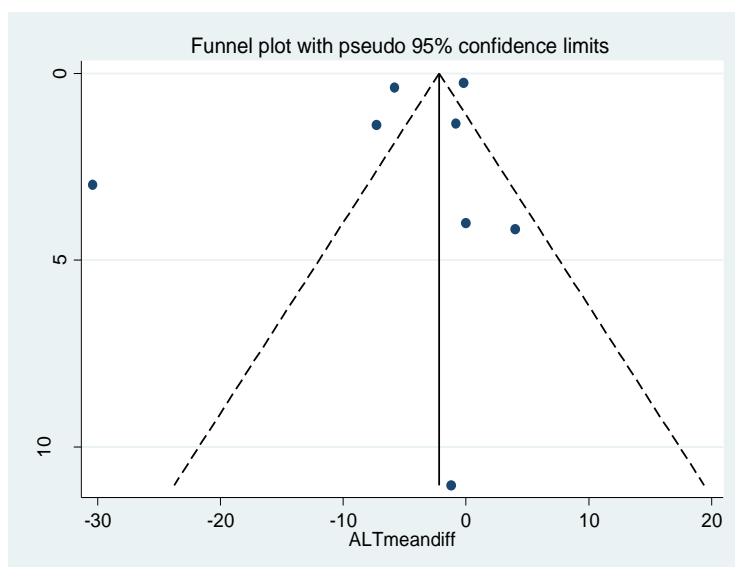

Egger's test P value= 0.402

**Figure S62:** Funnel plot of effect of the Mediterranean diet on alanine transaminase concentrations

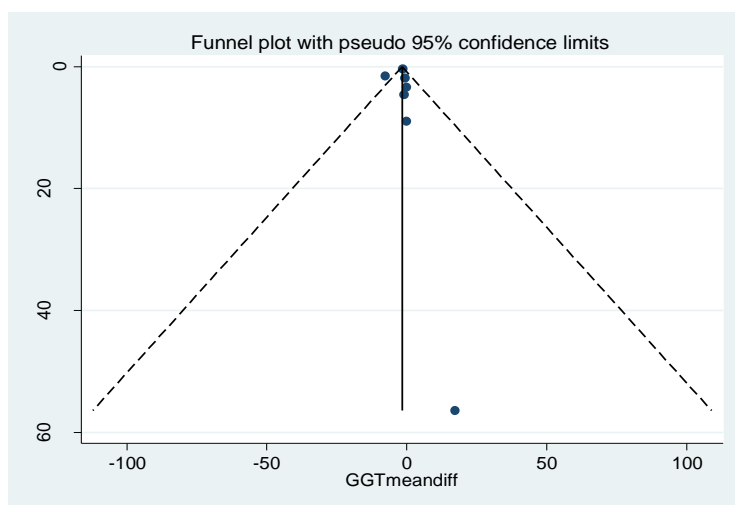

Egger's test P value= 0.700

**Figure S63:** Funnel plot of effect of the Mediterranean diet on gamma glutamyl transferase concentrations

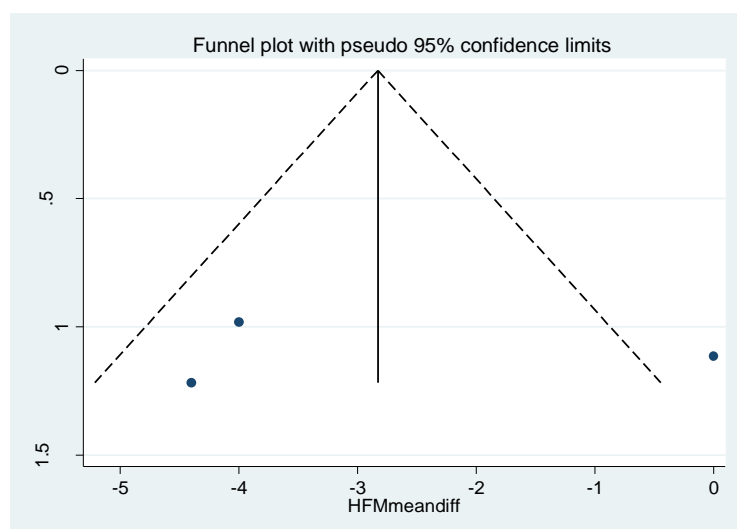

Egger's test P value= 0.927

**Figure S64:** Funnel plot of effect of the Mediterranean diet on hepatic fat mass

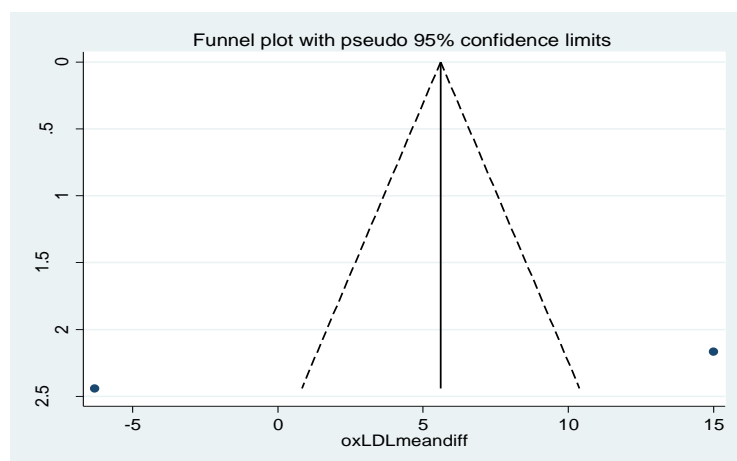

**Figure S65:** Funnel plot of effect of the Mediterranean diet on oxidised LDL-cholesterol concentrations

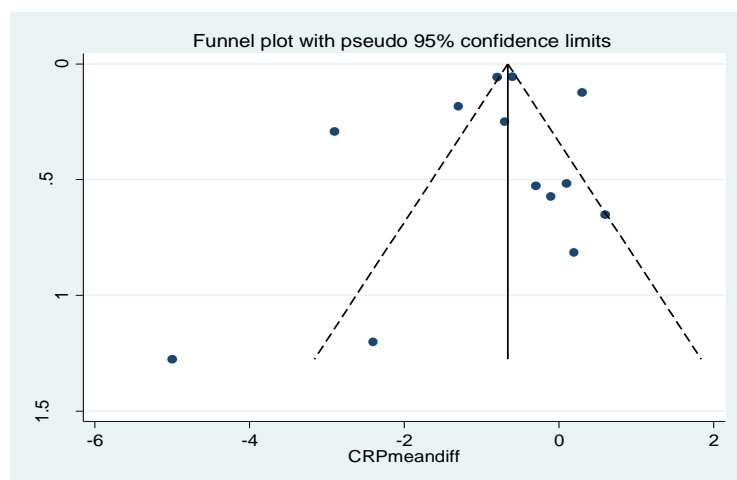

Egger's test P value= 0.728

**Figure S66:** Funnel plot of effect of the Mediterranean diet on C-reactive protein concentrations

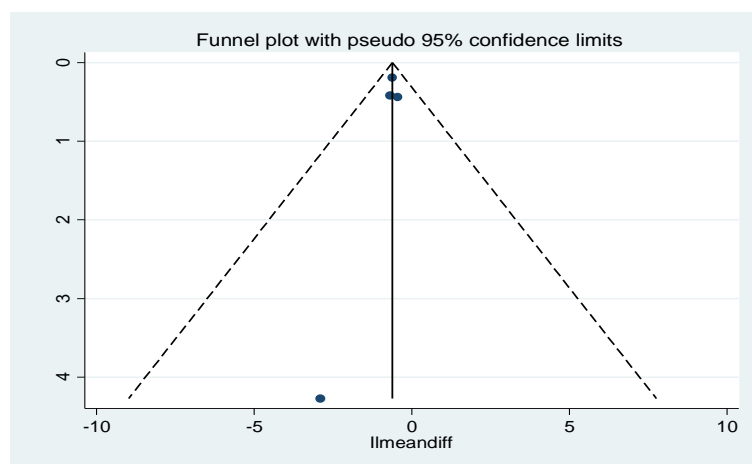

Egger's test P value= 0.477

**Figure S67: Funnel plot of effect of the Mediterranean diet on interleukin-6 concentrations**

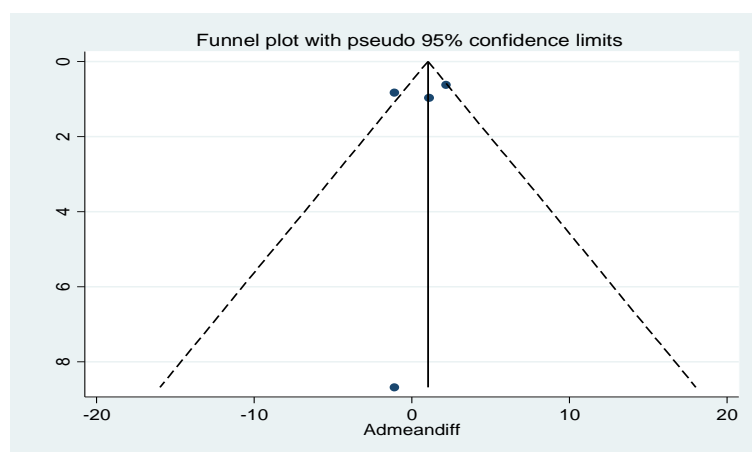

Egger's test P value= 0.722

**Figure S68: Funnel plot of effect of the Mediterranean diet on adiponectin concentrations**

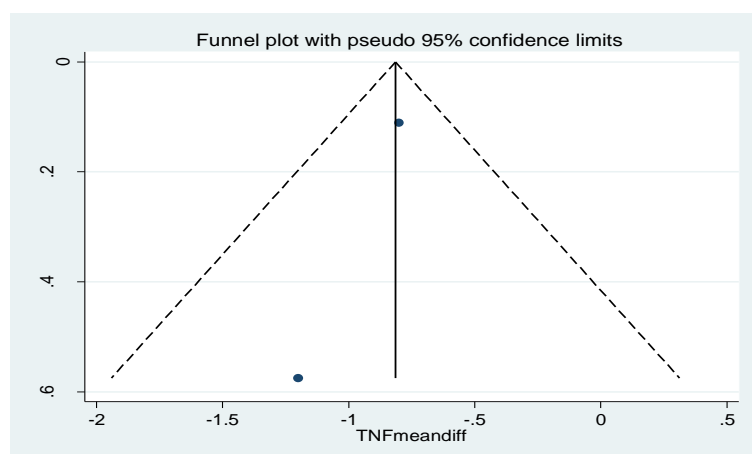

**Figure S69: Funnel plot of effect of the Mediterranean diet on tumour necrosis factor-α concentrations**



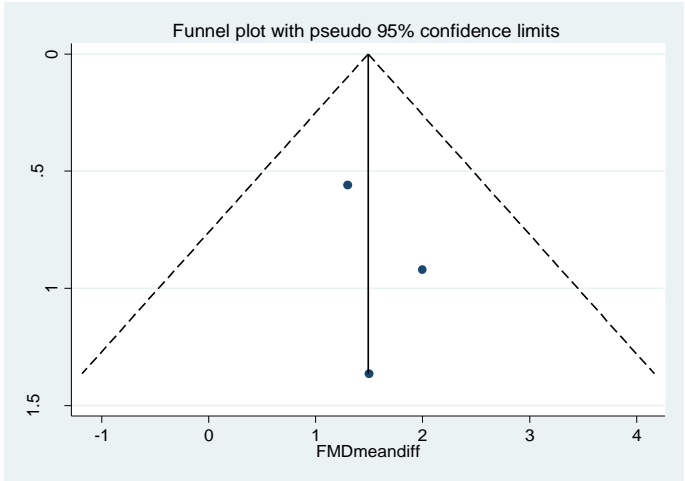

Egger's test P value= 0.611

**Figure S70: Funnel plot of effect of the Mediterranean diet on flow-mediated dilatation**

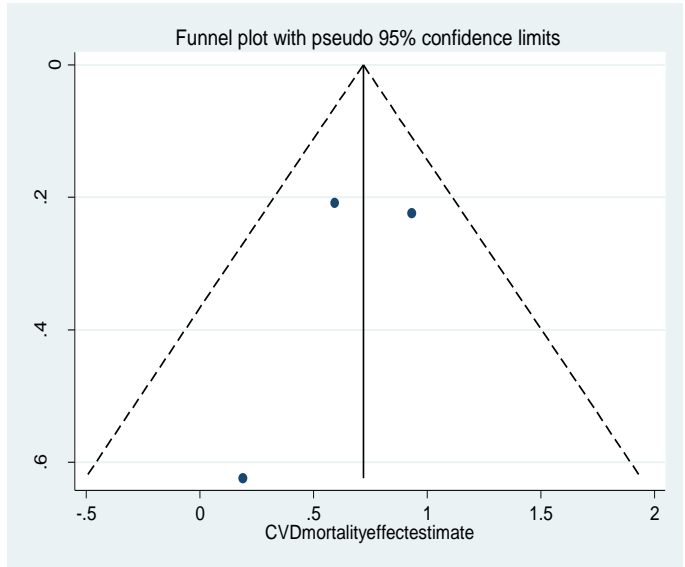

Egger's test P value= 0.624

**Figure S71: Funnel plot of effect of the Mediterranean diet on cardiovascular disease mortality**

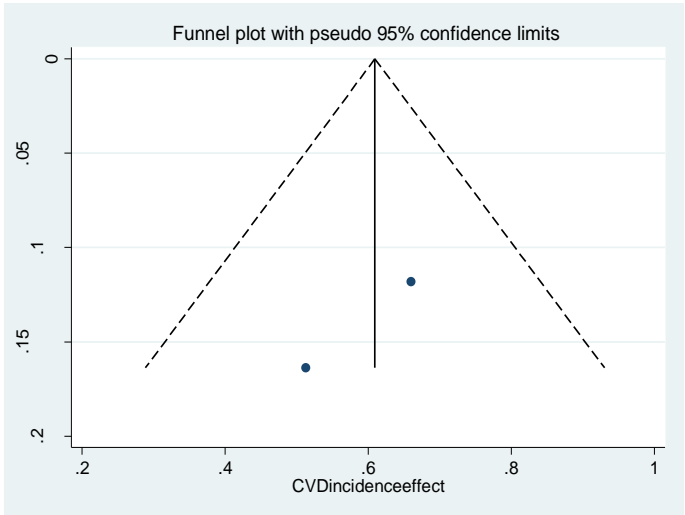

**Figure S72: Funnel plot of effect of the Mediterranean diet on cardiovascular disease incidence**

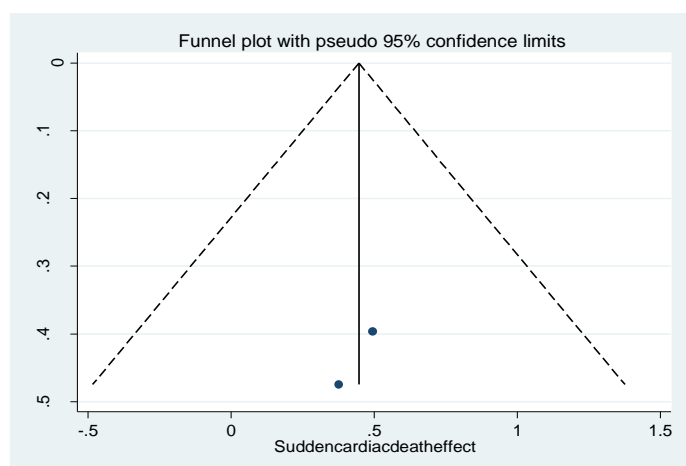

**Figure S73: Funnel plot of effect of the Mediterranean diet on sudden cardiac death**

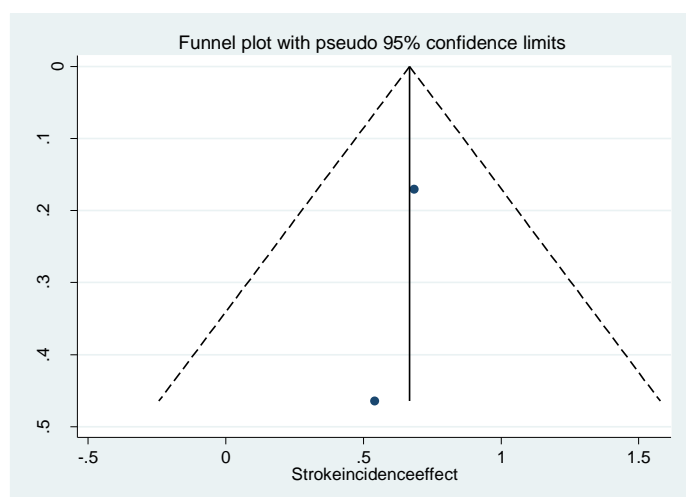

**Figure S74: Funnel plot of effect of the Mediterranean diet on stroke incidence**

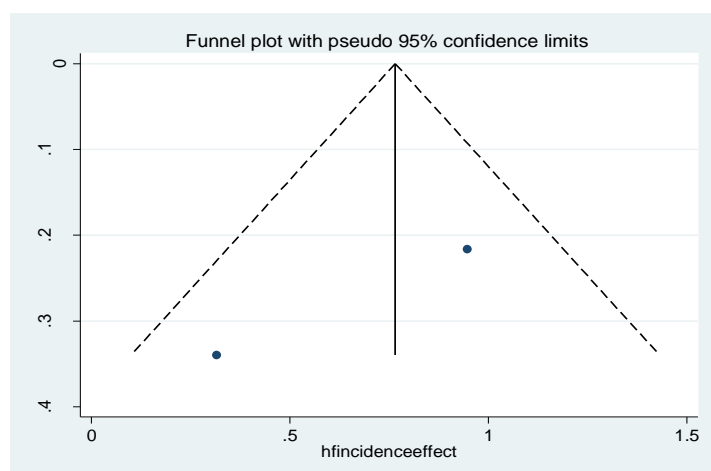

**Figure S75: Funnel plot of effect of the Mediterranean diet on heart failure incidence**

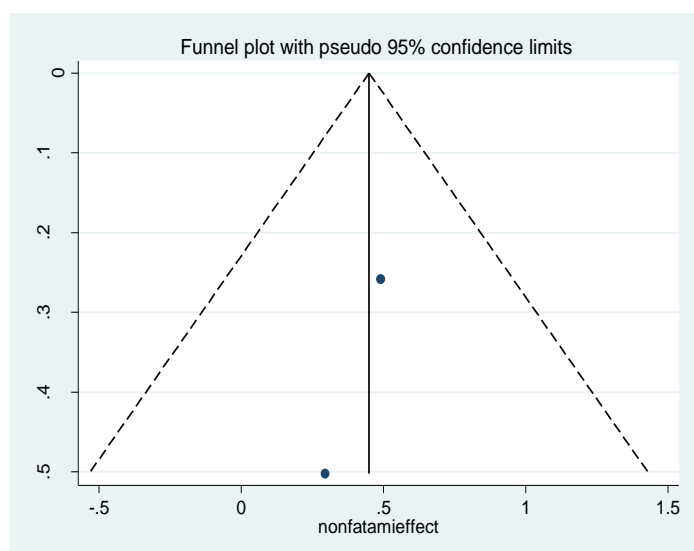

**Figure S76:** Funnel plot of effect of the Mediterranean diet on non-fatal myocardial infarction

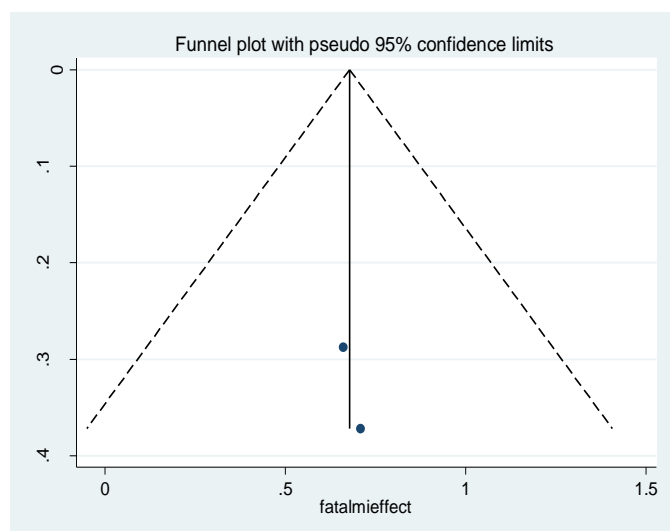

**Figure S77:** Funnel plot of effect of the Mediterranean diet on fatal myocardial infarction

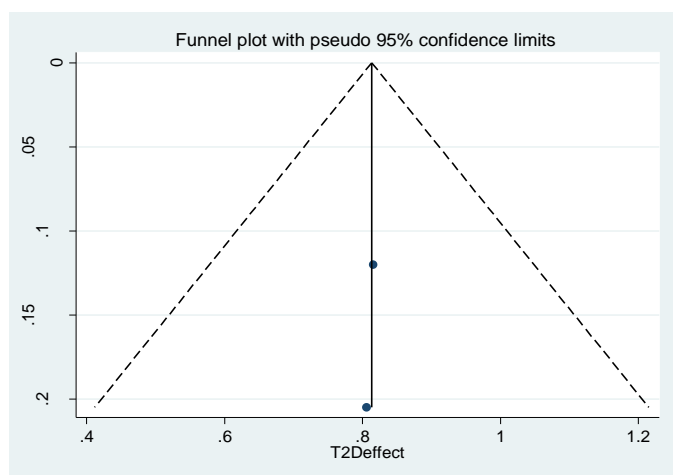

**Figure S78:** Funnel plot of effect of the Mediterranean diet on type 2 diabetes incidence

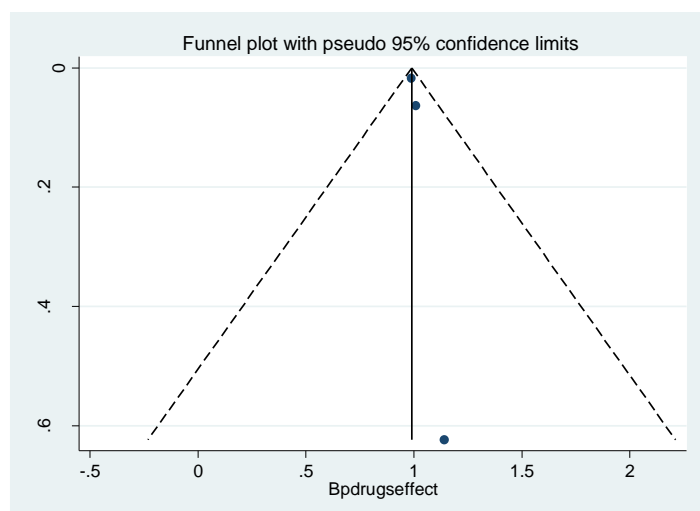

Egger's test P value= 0.211

**Figure S79:** Funnel plot of effect of the Mediterranean diet on the use of blood pressure lowering drugs

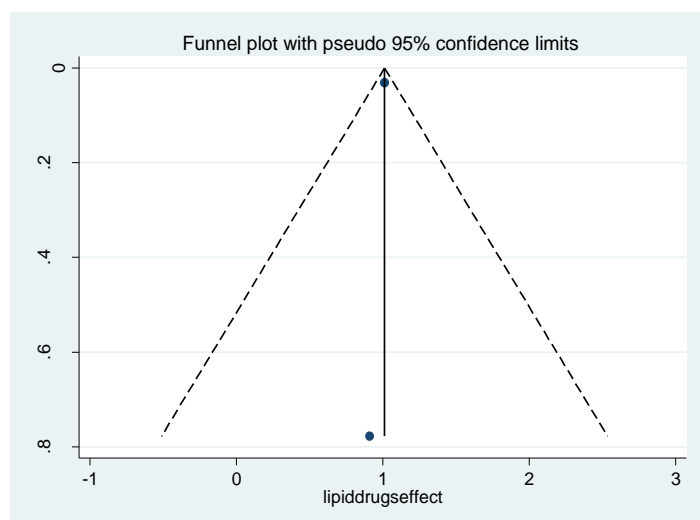

**Figure S80:** Funnel plot of effect of the Mediterranean diet on the use of lipid-lowering agents

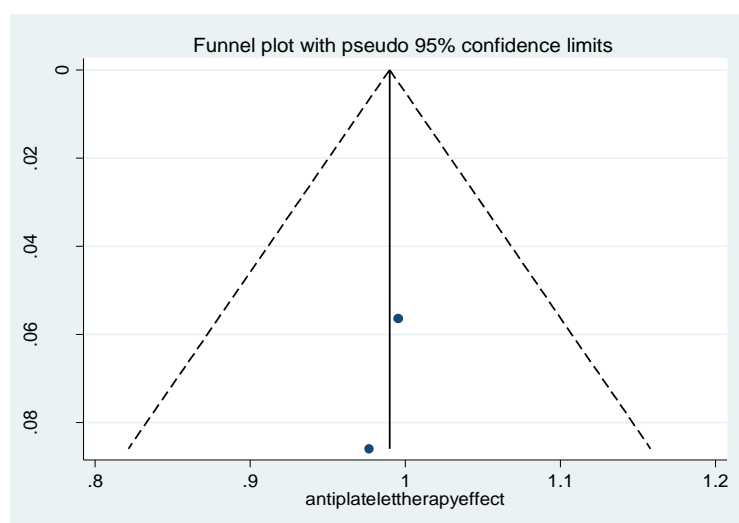

**Figure S81:** Funnel plot of effect of the Mediterranean diet on the use of anti-platelet therapy

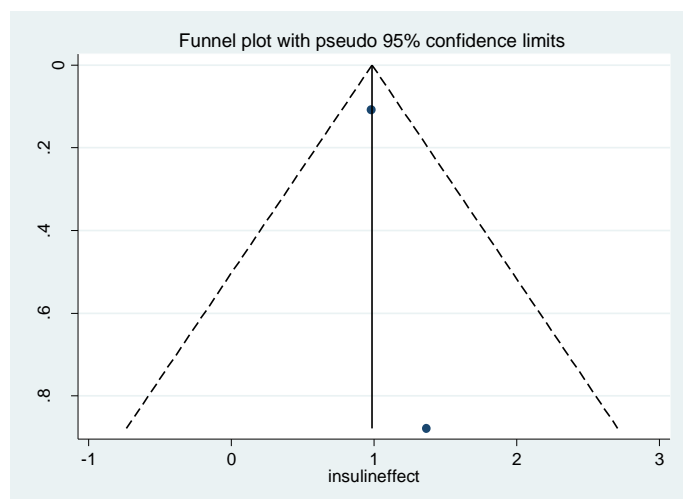

**Figure S82:** Funnel plot of effect of the Mediterranean diet on the use of insulin

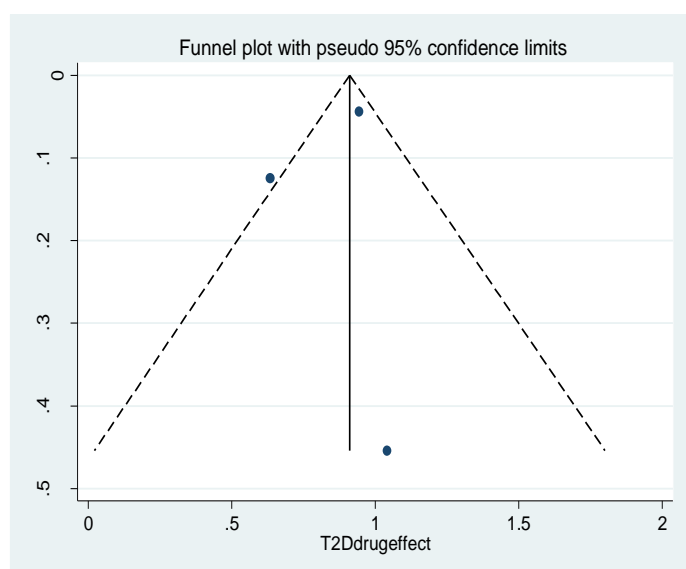

**Figure S83:** Funnel plot of effect of the Mediterranean diet on the use of oral antidiabetic agents

**Supplementary Table S12.** Detailed risk of bias for each included paper reporting a non-randomised controlled trial

|                                      | <b>Confounding</b> | <b>Selection for participants</b> | <b>Classification of interventions</b> | <b>Deviation from intended intervention</b> | <b>Missing data</b> | <b>Measurement of outcome</b> | <b>Selection of the reported result</b> | <b>Overall</b> |
|--------------------------------------|--------------------|-----------------------------------|----------------------------------------|---------------------------------------------|---------------------|-------------------------------|-----------------------------------------|----------------|
| Biolato et al 2019 [35]              | Serious            | No information                    | Low                                    | Low                                         | Low                 | Low                           | Moderate                                | Serious        |
| Papadaki & Scott 2005, 2008 [80, 81] | Low                | Low                               | Low                                    | Low                                         | Low                 | Low                           | Moderate                                | No information |
| Richard et al 2011, 2013 [85, 86]    | Low                | Unclear                           | Low                                    | Low                                         | Low                 | Low                           | Moderate                                | No information |
| Rogerson et al 2018 [87]             | Serious            | Critical                          | Low                                    | Low                                         | Low                 | Low                           | Moderate                                | Critical       |
| Thomazella et al 2011 [101]          | Serious            | Low                               | Low                                    | No information                              | Low                 | Low                           | Moderate                                | Serious        |
| Timar et al 2013 [102]               | No information     | No information                    | Low                                    | No information                              | No information      | Low                           | Moderate                                | No information |

**Supplementary Table S13.** Effect of the Mediterranean diet on anthropometric, blood pressure, biochemical, insulin resistance, oxidative stress, inflammatory and endothelial function markers related to the metabolic syndrome, according to different subgroups\*

| Outcome and/or subgroup          | Studies | Effect estimate (MD, 95% CI) | <i>P</i> | <i>I</i> <sup>2</sup> | <i>P</i> across subgroups | <i>P</i> for heterogeneity | % of between-study variance explained |
|----------------------------------|---------|------------------------------|----------|-----------------------|---------------------------|----------------------------|---------------------------------------|
| <b>Anthropometric markers</b>    |         |                              |          |                       |                           |                            |                                       |
| Body weight (kg)                 | 40      | -1.72 (-2.40, -1.05)         | <0.001   | 98.6%                 |                           |                            |                                       |
| <b>Food supplementation</b>      |         |                              |          |                       |                           |                            |                                       |
| Supplementation of foods         | 20      | -0.41 (-0.98, 0.17)          | 0.167    | 83.7%                 |                           |                            |                                       |
| No food supplementation          | 20      | -2.82 (-3.75, -1.90)         | <0.001   | 98.9%                 | 0.011                     | <0.001                     | 17.9%                                 |
| <b>Location</b>                  |         |                              |          |                       |                           |                            |                                       |
| Mediterranean                    | 18      | -2.29 (-3.04, -1.53)         | <0.001   | 96.0%                 |                           |                            |                                       |
| Non-Mediterranean                | 22      | -1.16 (-2.28, -0.04)         | 0.043    | 98.8%                 | 0.185                     | <0.001                     | 2.6%                                  |
| <b>Health status at baseline</b> |         |                              |          |                       |                           |                            |                                       |
| Healthy                          | 14      | -2.10 (-3.36, -0.85)         | 0.001    | 93.8%                 |                           |                            |                                       |
| Unhealthy                        | 26      | -1.55 (-2.39, -0.71)         | <0.001   | 99.0%                 | 0.466                     | <0.001                     | 3.2%                                  |
| <b>Intervention duration</b>     |         |                              |          |                       |                           |                            |                                       |
| <6 months                        | 19      | -1.01 (-2.23, 0.22)          | 0.109    | 93.3%                 |                           |                            |                                       |
| ≥6 months                        | 21      | -2.33 (-3.23, -1.43)         | <0.001   | 99.2%                 | 0.145                     | <0.001                     | 3.4%                                  |
| <b>Sample size</b>               |         |                              |          |                       |                           |                            |                                       |
| <150 participants                | 26      | -1.70 (-2.89, -0.51)         | 0.005    | 92.1%                 |                           |                            |                                       |

|                                      |    |                      |        |       |        |        |       |
|--------------------------------------|----|----------------------|--------|-------|--------|--------|-------|
| ≥150 participants                    | 14 | -1.82 (-2.83, -0.80) | <0.001 | 99.5% | 0.911  | <0.001 | -3.3% |
| <b>Type of intervention</b>          |    |                      |        |       |        |        |       |
| MD alone                             | 27 | -1.09 (-1.97, -0.21) | 0.016  | 99.0% |        |        |       |
| MD with other dietary component      | 13 | -2.97 (-4.19, -1.75) | <0.001 | 95.2% | 0.043  | <0.001 | 7.7%  |
| <b>Type of control treatment</b>     |    |                      |        |       |        |        |       |
| No treatment                         | 7  | -2.18 (-3.23, -1.14) | <0.001 | 92.2% |        |        |       |
| Low-fat diet                         | 9  | 0.01 (-1.10, 1.12)   | 0.985  | 92.0% |        |        |       |
| Reduced energy, low-fat diet         | 5  | -4.07 (-7.15, -0.99) | 0.010  | 95.8% |        |        |       |
| Low-fat, high-carbohydrate diet      | 2  | 1.50 (-1.86, 4.86)   | 0.383  | 0.0%  |        |        |       |
| Healthy diet or dietary guidelines   | 5  | -4.38 (-6.37, -2.40) | <0.001 | 92.9% |        |        |       |
| NCEP diet                            | 3  | -3.22 (-6.06, -0.38) | 0.026  | 99.8% | 0.443  | <0.001 | -1.0% |
| Body mass index (kg/m <sup>2</sup> ) | 37 | -0.41 (-0.71, -0.10) | 0.010  | 98.6% |        |        |       |
| <b>Food supplementation</b>          |    |                      |        |       |        |        |       |
| Supplementation of foods             | 16 | 0.11 (-0.24, 0.46)   | 0.531  | 96.2% |        |        |       |
| No food supplementation              | 21 | -0.70 (-0.94, -0.46) | <0.001 | 88.6% | <0.001 | <0.001 | 55.3% |
| <b>Location</b>                      |    |                      |        |       |        |        |       |
| Mediterranean                        | 16 | -0.43 (-0.66, -0.19) | <0.001 | 90.5% |        |        |       |
| Non-Mediterranean                    | 21 | -0.27 (-0.71, 0.17)  | 0.226  | 96.2% | 0.298  | <0.001 | -2.8% |
| <b>Health status at baseline</b>     |    |                      |        |       |        |        |       |
| Healthy                              | 11 | -0.62 (-1.11, -0.12) | 0.014  | 90.3% |        |        |       |



|                                    |    |                      |        |       |       |        |       |
|------------------------------------|----|----------------------|--------|-------|-------|--------|-------|
| Unhealthy                          | 26 | -0.30 (-0.66, 0.06)  | 0.107  | 98.9% | 0.314 | <0.001 | -5.0% |
| <b>Intervention duration</b>       |    |                      |        |       |       |        |       |
| <6 months                          | 16 | -0.17 (-0.65, 0.31)  | 0.481  | 95.6% |       |        |       |
| ≥6 months                          | 21 | -0.45 (-0.65, -0.25) | <0.001 | 88.6% | 0.163 | <0.001 | 4.8%  |
| <b>Sample size</b>                 |    |                      |        |       |       |        |       |
| <150 participants                  | 23 | -0.35 (-0.73, 0.02)  | 0.067  | 97.2% |       |        |       |
| ≥150 participants                  | 14 | -0.43 (-0.69, -0.18) | 0.001  | 92.9% | 0.569 | <0.001 | 1.4%  |
| <b>Type of intervention</b>        |    |                      |        |       |       |        |       |
| MD alone                           | 24 | -0.19 (-0.54, 0.16)  | 0.290  | 97.1% |       |        |       |
| MD with other dietary component    | 13 | -0.63 (-0.92, -0.34) | <0.001 | 90.1% | 0.035 | <0.001 | 8.0%  |
| <b>Type of control treatment</b>   |    |                      |        |       |       |        |       |
| No treatment                       | 5  | -0.42 (-0.91, 0.08)  | 0.098  | 92.9% |       |        |       |
| Low-fat diet                       | 8  | -0.03 (-0.52, 0.46)  | 0.901  | 92.1% |       |        |       |
| Reduced energy, low-fat diet       | 5  | -0.72 (-1.30, -0.14) | 0.015  | 71.4% |       |        |       |
| Healthy diet or dietary guidelines | 9  | -0.65 (-1.06, -0.23) | 0.002  | 92.6% |       |        |       |
| NCEP diet                          | 2  | -0.69 (-1.60, 0.21)  | 0.134  | 57.6% | 0.255 | <0.001 | 6.1%  |
| Waist circumference (cm)           | 27 | -1.47 (-2.54, -0.39) | 0.007  | 99.6% |       |        |       |
| <b>Food supplementation</b>        |    |                      |        |       |       |        |       |
| Supplementation of foods           | 11 | -0.37 (-1.55, 0.80)  | 0.532  | 93.2% |       |        |       |
| No food supplementation            | 16 | -1.84 (-2.53, -1.14) | <0.001 | 92.4% | 0.191 | <0.001 | 5.3%  |

|                                    |    |                      |        |       |       |        |       |
|------------------------------------|----|----------------------|--------|-------|-------|--------|-------|
| <b>Location</b>                    |    |                      |        |       |       |        |       |
| Mediterranean                      | 14 | -1.54 (-2.21, -0.86) | <0.001 | 93.6% |       |        |       |
| Non-Mediterranean                  | 13 | -0.93 (-2.28, 0.42)  | 0.179  | 90.3% | 0.554 | <0.001 | -3.5% |
| <b>Health status at baseline</b>   |    |                      |        |       |       |        |       |
| Healthy                            | 7  | -2.53 (-4.63, -0.44) | 0.018  | 85.1% |       |        |       |
| Unhealthy                          | 20 | -1.11 (-2.35, 0.13)  | 0.079  | 99.7% | 0.380 | <0.001 | -1.0% |
| <b>Intervention duration</b>       |    |                      |        |       |       |        |       |
| <6 months                          | 13 | -1.42 (-3.11, 0.28)  | 0.102  | 94.8% |       |        |       |
| ≥6 months                          | 14 | -1.30 (-1.87, -0.73) | <0.001 | 89.8% | 0.915 | <0.001 | -6.1% |
| <b>Sample size</b>                 |    |                      |        |       |       |        |       |
| <150 participants                  | 19 | -1.56 (-2.71, -0.41) | 0.008  | 97.6% |       |        |       |
| ≥150 participants                  | 8  | -1.10 (-1.81, -0.40) | 0.002  | 90.4% | 0.693 | <0.001 | -6.1% |
| <b>Type of intervention</b>        |    |                      |        |       |       |        |       |
| MD alone                           | 11 | -0.87 (-2.08, 0.35)  | 0.162  | 96.8% |       |        |       |
| MD with other dietary component    | 16 | -1.66 (-2.52, -0.80) | <0.001 | 94.8% | 0.295 | <0.001 | -1.9% |
| <b>Type of control treatment</b>   |    |                      |        |       |       |        |       |
| No treatment                       | 2  | -3.04 (-4.95, -1.13) | 0.002  | 0.0%  |       |        |       |
| Low-fat diet                       | 7  | 0.38 (-1.24, 1.99)   | 0.649  | 98.3% |       |        |       |
| Reduced energy, low-fat diet       | 4  | -5.67 (-9.49, -1.86) | 0.004  | 95.4% |       |        |       |
| Healthy diet or dietary guidelines | 6  | -1.64 (-2.60, -0.68) | 0.001  | 94.8% | 0.984 | <0.001 | -7.0% |

**Blood pressure**

|                                 |    |                      |        |       |
|---------------------------------|----|----------------------|--------|-------|
| Systolic blood pressure (mm Hg) | 27 | -1.34 (-2.00, -0.67) | <0.001 | 93.6% |
|---------------------------------|----|----------------------|--------|-------|

**Food supplementation**

|                          |    |                      |       |       |
|--------------------------|----|----------------------|-------|-------|
| Supplementation of foods | 13 | -1.44 (-2.78, -0.11) | 0.034 | 91.1% |
|--------------------------|----|----------------------|-------|-------|

|                         |    |                      |        |       |       |        |       |
|-------------------------|----|----------------------|--------|-------|-------|--------|-------|
| No food supplementation | 14 | -1.53 (-2.41, -0.65) | <0.001 | 92.2% | 0.702 | <0.001 | -8.5% |
|-------------------------|----|----------------------|--------|-------|-------|--------|-------|

**Location**

|               |    |                      |       |       |
|---------------|----|----------------------|-------|-------|
| Mediterranean | 10 | -1.19 (-2.17, -0.21) | 0.017 | 94.4% |
|---------------|----|----------------------|-------|-------|

|                   |    |                      |       |       |       |        |       |
|-------------------|----|----------------------|-------|-------|-------|--------|-------|
| Non-Mediterranean | 17 | -1.66 (-3.08, -0.25) | 0.021 | 91.5% | 0.472 | <0.001 | -6.7% |
|-------------------|----|----------------------|-------|-------|-------|--------|-------|

**Health status at baseline**

|         |   |                      |       |      |
|---------|---|----------------------|-------|------|
| Healthy | 8 | -1.43 (-2.52, -0.34) | 0.010 | 0.0% |
|---------|---|----------------------|-------|------|

|           |    |                      |        |       |       |       |       |
|-----------|----|----------------------|--------|-------|-------|-------|-------|
| Unhealthy | 19 | -1.28 (-2.02, -0.54) | <0.001 | 95.4% | 0.806 | 0.043 | -5.9% |
|-----------|----|----------------------|--------|-------|-------|-------|-------|

**Intervention duration**

|           |    |                     |       |       |
|-----------|----|---------------------|-------|-------|
| <6 months | 12 | -0.62 (-2.58, 1.34) | 0.534 | 87.4% |
|-----------|----|---------------------|-------|-------|

|           |    |                      |        |       |       |        |      |
|-----------|----|----------------------|--------|-------|-------|--------|------|
| ≥6 months | 15 | -1.91 (-2.54, -1.29) | <0.001 | 92.3% | 0.287 | <0.001 | 3.0% |
|-----------|----|----------------------|--------|-------|-------|--------|------|

**Sample size**

|                   |    |                     |       |       |
|-------------------|----|---------------------|-------|-------|
| <150 participants | 16 | -1.01 (-2.73, 0.71) | 0.250 | 87.4% |
|-------------------|----|---------------------|-------|-------|

|                   |    |                      |       |       |       |        |       |
|-------------------|----|----------------------|-------|-------|-------|--------|-------|
| ≥150 participants | 11 | -1.50 (-2.36, -0.63) | 0.001 | 96.5% | 0.608 | <0.001 | -6.9% |
|-------------------|----|----------------------|-------|-------|-------|--------|-------|

**Type of intervention**

|          |    |                      |       |       |
|----------|----|----------------------|-------|-------|
| MD alone | 16 | -1.55 (-2.45, -0.65) | 0.001 | 94.3% |
|----------|----|----------------------|-------|-------|

|                                 |    |                     |       |       |       |        |       |
|---------------------------------|----|---------------------|-------|-------|-------|--------|-------|
| MD with other dietary component | 11 | -0.87 (-2.12, 0.38) | 0.172 | 92.5% | 0.299 | <0.001 | -6.1% |
|---------------------------------|----|---------------------|-------|-------|-------|--------|-------|

|                                    |    |                      |        |       |       |        |       |
|------------------------------------|----|----------------------|--------|-------|-------|--------|-------|
| <b>Type of control treatment</b>   |    |                      |        |       |       |        |       |
| No treatment                       | 4  | -1.98 (-2.20, -1.76) | <0.001 | 0.0%  |       |        |       |
| Low-fat diet                       | 6  | -1.67 (-3.49, 0.15)  | 0.072  | 54.1% |       |        |       |
| Reduced energy, low-fat diet       | 4  | 1.25 (-1.17 (3.68)   | 0.312  | 94.9% |       |        |       |
| Healthy diet or dietary guidelines | 5  | -2.22 (-3.78, -0.66) | 0.005  | 95.4% |       |        |       |
| NCEP diet                          | 2  | -3.47 (-5.13, -1.81) | <0.001 | 46.6% | 0.246 | <0.001 | 4.0%  |
| Diastolic blood pressure (mm Hg)   | 27 | -0.81 (-1.30, -0.32) | 0.001  | 92.8% |       |        |       |
| <b>Food supplementation</b>        |    |                      |        |       |       |        |       |
| Supplementation of foods           | 13 | -0.42 (-1.41, 0.56)  | 0.399  | 90.6% |       |        |       |
| No food supplementation            | 14 | -1.43 (-1.87, -1.00) | <0.001 | 79.7% | 0.165 | <0.001 | 17.0% |
| <b>Location</b>                    |    |                      |        |       |       |        |       |
| Mediterranean                      | 10 | -0.87 (-1.67, -0.08) | 0.030  | 93.6% |       |        |       |
| Non-Mediterranean                  | 17 | -0.79 (-1.57, -0.00) | 0.050  | 87.9% | 0.915 | <0.001 | -8.0% |
| <b>Health status at baseline</b>   |    |                      |        |       |       |        |       |
| Healthy                            | 8  | -1.01 (-2.19, 0.16)  | 0.091  | 48.7% |       |        |       |
| Unhealthy                          | 19 | -0.77 (-1.31, -0.22) | 0.006  | 94.7% | 0.728 | 0.058  | -6.6% |
| <b>Intervention duration</b>       |    |                      |        |       |       |        |       |
| <6 months                          | 12 | -0.78 (-2.17, 0.62)  | 0.275  | 86.9% |       |        |       |
| ≥6 months                          | 15 | -1.12 (-1.57 (-0.67) | <0.001 | 90.7% | 0.599 | <0.001 | -0.2% |
| <b>Sample size</b>                 |    |                      |        |       |       |        |       |

|                                    |    |                      |        |       |       |        |       |
|------------------------------------|----|----------------------|--------|-------|-------|--------|-------|
| <150 participants                  | 16 | -0.91 (-1.74, -0.07) | 0.034  | 71.1% |       |        |       |
| ≥150 participants                  | 11 | -0.77 (-1.43, -0.12) | 0.021  | 96.4% | 0.784 | <0.001 | -8.3% |
| <b>Type of intervention</b>        |    |                      |        |       |       |        |       |
| MD alone                           | 16 | -0.58 (-1.34, 0.19)  | 0.140  | 95.2% |       |        |       |
| MD with other dietary component    | 11 | -1.28 (-1.82, -0.74) | <0.001 | 72.7% | 0.419 | <0.001 | 1.9%  |
| <b>Type of control treatment</b>   |    |                      |        |       |       |        |       |
| No treatment                       | 4  | -0.56 (-1.76, 0.65)  | 0.365  | 56.2% |       |        |       |
| Low-fat diet                       | 6  | -0.38 (-1.14, 0.38)  | 0.328  | 20.2% |       |        |       |
| Reduced energy, low-fat diet       | 4  | -0.15 (-2.54, 2.24)  | 0.904  | 96.1% |       |        |       |
| Healthy diet or dietary guidelines | 5  | -1.36 (-2.08, -0.64) | <0.001 | 86.3% |       |        |       |
| NCEP diet                          | 2  | -1.82 (-2.57, -1.07) | <0.001 | 35.6% | 0.485 | <0.001 | 1.5%  |
| Glucose (mg/dL)                    | 31 | -2.98 (-4.54, -1.42) | <0.001 | 98.1% |       |        |       |
| <b>Food supplementation</b>        |    |                      |        |       |       |        |       |
| Supplementation of foods           | 16 | -0.20 (-2.31, 1.91)  | 0.854  | 94.5% |       |        |       |
| No food supplementation            | 15 | -5.81 (-8.00, -3.63) | <0.001 | 98.5% | 0.016 | <0.001 | 18.9% |
| <b>Location</b>                    |    |                      |        |       |       |        |       |
| Mediterranean                      | 17 | -5.47 (-8.21, -2.72) | <0.001 | 98.5% |       |        |       |
| Non-Mediterranean                  | 14 | -0.31 (-2.65, 2.03)  | 0.883  | 97.0% | 0.025 | <0.001 | 13.3% |
| <b>Health status at baseline</b>   |    |                      |        |       |       |        |       |
| Healthy                            | 10 | -1.67 (-3.85, 0.51)  | 0.132  | 94.6% |       |        |       |

|                                    |    |                       |        |       |       |        |       |
|------------------------------------|----|-----------------------|--------|-------|-------|--------|-------|
| Unhealthy                          | 21 | -3.77 (-5.87, -1.68)  | <0.001 | 98.4% | 0.311 | <0.001 | -1.0% |
| <b>Intervention duration</b>       |    |                       |        |       |       |        |       |
| <6 months                          | 17 | -0.18 (-1.78, 1.42)   | 0.824  | 94.6% |       |        |       |
| ≥6 months                          | 14 | -6.97 (-9.47, -4.46)  | <0.001 | 98.1% | 0.002 | <0.001 | 27.0% |
| <b>Sample size</b>                 |    |                       |        |       |       |        |       |
| <150 participants                  | 21 | -1.72 (-4.56, 1.12)   | 0.235  | 98.3% |       |        |       |
| ≥150 participants                  | 10 | -5.15 (-7.25, -3.05)  | <0.001 | 97.5% | 0.103 | <0.001 | 3.0%  |
| <b>Type of intervention</b>        |    |                       |        |       |       |        |       |
| MD alone                           | 18 | -2.45 (-5.10, 0.20)   | 0.070  | 98.7% |       |        |       |
| MD with other dietary component    | 13 | -3.67 (-5.45, -1.90)  | <0.001 | 95.0% | 0.647 | <0.001 | -2.7% |
| <b>Type of control treatment</b>   |    |                       |        |       |       |        |       |
| No treatment                       | 2  | 3.16 (-6.33, 12.65)   | 0.514  | 91.1% |       |        |       |
| Low-fat diet                       | 5  | 1.69 (-1.06, 4.44)    | 0.229  | 77.5% |       |        |       |
| Reduced energy, low-fat diet       | 5  | -4.70 (-8.50, -0.91)  | 0.015  | 96.7% |       |        |       |
| Low-fat, high-carbohydrate diet    | 2  | 0.72 (-3.33, 4.77)    | 0.726  | 0.0%  |       |        |       |
| Healthy diet or dietary guidelines | 7  | -7.83 (-13.13, -2.54) | 0.004  | 98.9% |       |        |       |
| NCEP diet                          | 2  | -0.95 (-8.59, 6.70)   | 0.809  | 98.8% | 0.293 | <0.001 | 1.0%  |
| Insulin (μU/mL)                    | 20 | -0.94 (-1.72, -0.16)  | 0.019  | 97.2% |       |        |       |
| <b>Food supplementation</b>        |    |                       |        |       |       |        |       |
| Supplementation of foods           | 10 | -0.31 (-1.70, 1.07)   | 0.657  | 94.5% |       |        |       |

|                                  |    |                      |        |       |       |        |       |
|----------------------------------|----|----------------------|--------|-------|-------|--------|-------|
| No food supplementation          | 10 | -1.54 (-2.64, -0.44) | 0.006  | 98.1% | 0.390 | <0.001 | -0.5% |
| <b>Location</b>                  |    |                      |        |       |       |        |       |
| Mediterranean                    | 13 | -1.55 (-2.43, -0.67) | 0.001  | 97.5% |       |        |       |
| Non-Mediterranean                | 7  | 0.27 (-1.95, 2.50)   | 0.809  | 95.6% | 0.205 | <0.001 | 4.6%  |
| <b>Health status at baseline</b> |    |                      |        |       |       |        |       |
| Healthy                          | 7  | -0.24 (-0.67, 0.19)  | 0.273  | 58.3% |       |        |       |
| Unhealthy                        | 13 | -1.26 (-2.40, -0.11) | 0.031  | 97.7% | 0.424 | 0.025  | -3.5% |
| <b>Intervention duration</b>     |    |                      |        |       |       |        |       |
| <6 months                        | 12 | -0.54 (-1.51, 0.42)  | 0.270  | 95.1% |       |        |       |
| ≥6 months                        | 8  | -1.49 (-2.80, -0.19) | 0.025  | 97.9% | 0.512 | <0.001 | -3.1% |
| <b>Sample size</b>               |    |                      |        |       |       |        |       |
| <150 participants                | 12 | -0.85 (-2.32, 0.62)  | 0.259  | 97.8% |       |        |       |
| ≥150 participants                | 8  | -1.06 (-1.97, -0.15) | 0.022  | 95.9% | 0.959 | <0.001 | -6.9% |
| <b>Type of intervention</b>      |    |                      |        |       |       |        |       |
| MD alone                         | 11 | -0.17 (-1.59, 1.25)  | 0.811  | 93.9% |       |        |       |
| MD with other dietary component  | 9  | -1.64 (-2.73, -0.56) | 0.003  | 98.3% | 0.253 | <0.001 | 2.1%  |
| <b>Type of control treatment</b> |    |                      |        |       |       |        |       |
| No treatment                     | 2  | 2.03 (-3.74, 7.80)   | 0.491  | 79.2% |       |        |       |
| Low-fat diet                     | 4  | 0.89 (-2.08, 3.86)   | 0.558  | 96.8% |       |        |       |
| Reduced energy, low-fat diet     | 3  | -0.47 (-0.73, -0.21) | <0.001 | 61.3% |       |        |       |

|                                    |    |                      |        |       |       |        |       |
|------------------------------------|----|----------------------|--------|-------|-------|--------|-------|
| Low-fat, high-carbohydrate diet    | 2  | -4.74 (-9.53, 0.04)  | 0.052  | 81.2% |       |        |       |
| Healthy diet or dietary guidelines | 5  | -3.37 (-3.76, -2.99) | <0.001 | 34.0% | 0.179 | <0.001 | 10.0% |
| HOMA-IR index                      | 18 | -0.42 (-0.70, -0.15) | 0.003  | 97.7% |       |        |       |
| <b>Food supplementation</b>        |    |                      |        |       |       |        |       |
| Supplementation of foods           | 7  | -0.45 (-0.77, -0.12) | 0.007  | 86.5% |       |        |       |
| No food supplementation            | 11 | -0.39 (-0.73, -0.06) | 0.022  | 97.6% | 0.806 | <0.001 | -7.0% |
| <b>Location</b>                    |    |                      |        |       |       |        |       |
| Mediterranean                      | 14 | -0.38 (-0.69, -0.06) | 0.019  | 98.1% |       |        |       |
| Non-Mediterranean                  | 4  | -0.58 (-1.21, 0.05)  | 0.071  | 88.5% | 0.590 | <0.001 | -5.1% |
| <b>Health status at baseline</b>   |    |                      |        |       |       |        |       |
| Healthy                            | 4  | -0.26 (-0.57, 0.05)  | 0.096  | 84.6% |       |        |       |
| Unhealthy                          | 14 | -0.49 (-0.83, -0.14) | 0.006  | 98.0% | 0.460 | <0.001 | -4.3% |
| <b>Intervention duration</b>       |    |                      |        |       |       |        |       |
| <6 months                          | 9  | -0.23 (-0.62, 0.16)  | 0.247  | 93.3% |       |        |       |
| ≥6 months                          | 9  | -0.61 (-0.89, -0.34) | <0.001 | 96.1% | 0.243 | <0.001 | 7.4%  |
| <b>Sample size</b>                 |    |                      |        |       |       |        |       |
| <150 participants                  | 9  | -0.36 (-0.86, 0.15)  | 0.164  | 96.0% |       |        |       |
| ≥150 participants                  | 9  | -0.49 (-0.87, -0.10) | 0.013  | 98.4% | 0.671 | <0.001 | -5.0% |
| <b>Type of intervention</b>        |    |                      |        |       |       |        |       |
| MD alone                           | 8  | 0.55 (-1.04, -0.05)  | 0.030  | 98.5% |       |        |       |



|                                    |    |                       |        |       |       |        |       |
|------------------------------------|----|-----------------------|--------|-------|-------|--------|-------|
| MD with other dietary component    | 10 | -0.32 (-0.65, 0.02)   | 0.064  | 95.6% | 0.471 | <0.001 | -2.1% |
| <b>Type of control treatment</b>   |    |                       |        |       |       |        |       |
| Low-fat diet                       | 4  | -0.75 (-1.09, -0.41)  | <0.001 | 66.1% |       |        |       |
| Reduced energy, low-fat diet       | 5  | -0.32 (-0.59, -0.04)  | 0.023  | 90.6% |       |        |       |
| Healthy diet or dietary guidelines | 5  | -0.33 (-1.20, 0.54)   | 0.460  | 97.7% | 0.389 | <0.001 | -1.6% |
| Total cholesterol (mg/dL)          | 37 | -5.70 (-9.96, -1.43)  | 0.009  | 98.6% |       |        |       |
| <b>Food supplementation</b>        |    |                       |        |       |       |        |       |
| Supplementation of foods           | 19 | -6.79 (-13.35, -0.23) | 0.042  | 95.2% |       |        |       |
| No food supplementation            | 18 | -4.52 (-10.65, 1.60)  | 0.148  | 99.1% | 0.616 | <0.001 | -2.2% |
| <b>Location</b>                    |    |                       |        |       |       |        |       |
| Mediterranean                      | 16 | -6.38 (-9.71, -3.06)  | <0.001 | 93.6% |       |        |       |
| Non-Mediterranean                  | 21 | -5.18 (-13.18, 2.83)  | 0.255  | 97.5% | 0.700 | <0.001 | -2.5% |
| <b>Health status at baseline</b>   |    |                       |        |       |       |        |       |
| Healthy                            | 11 | -1.74 (-14.63, 11.15) | 0.791  | 98.6% |       |        |       |
| Unhealthy                          | 26 | -7.29 (-11.66, -2.92) | 0.001  | 98.2% | 0.285 | <0.001 | 0.0%  |
| <b>Intervention duration</b>       |    |                       |        |       |       |        |       |
| <6 months                          | 18 | -5.59 (-12.02, 0.85)  | 0.089  | 96.7% |       |        |       |
| ≥6 months                          | 19 | -5.75 (-11.36, -0.15) | 0.044  | 98.6% | 0.969 | <0.001 | -3.0% |
| <b>Sample size</b>                 |    |                       |        |       |       |        |       |
| <150 participants                  | 24 | -5.13 (-11.5, 1.24)   | 0.114  | 97.2% |       |        |       |

|                                    |    |                        |        |       |       |        |       |
|------------------------------------|----|------------------------|--------|-------|-------|--------|-------|
| ≥150 participants                  | 13 | -6.71 (-12.60, -0.82)  | 0.025  | 98.6% | 0.756 | <0.001 | -2.7% |
| <b>Type of intervention</b>        |    |                        |        |       |       |        |       |
| MD alone                           | 23 | -5.62 (-12.02, 0.77)   | 0.085  | 98.1% |       |        |       |
| MD with other dietary component    | 14 | -5.79 (-9.57, -2.01)   | 0.003  | 93.3% | 0.985 | <0.001 | -3.0% |
| <b>Type of control treatment</b>   |    |                        |        |       |       |        |       |
| No treatment                       | 5  | -3.68 (-7.96, 0.60)    | 0.092  | 28.4% |       |        |       |
| Low-fat diet                       | 7  | -10.37 (-14.75, -5.60) | <0.001 | 0.0%  |       |        |       |
| Reduced energy, low-fat diet       | 4  | -4.63 (-6.77, -2.49)   | <0.001 | 41.8% |       |        |       |
| Healthy diet or dietary guidelines | 8  | -3.22 (-10.70, 4.27)   | 0.400  | 97.8% |       |        |       |
| NCEP diet                          | 2  | -2.18 (-37.56, 33.19)  | 0.904  | 99.3% | 0.995 | <0.001 | -3.9% |
| LDL-cholesterol (mg/dL)            | 29 | -8.24 (-13.50, -2.99)  | 0.002  | 99.6% |       |        |       |
| <b>Food supplementation</b>        |    |                        |        |       |       |        |       |
| Supplementation of foods           | 16 | -9.01 (-15.16, -2.86)  | 0.004  | 98.5% |       |        |       |
| No food supplementation            | 13 | -7.31 (-14.50, -0.12)  | 0.046  | 99.1% | 0.727 | <0.001 | -3.9% |
| <b>Location</b>                    |    |                        |        |       |       |        |       |
| Mediterranean                      | 11 | -7.94 (-14.58, -1.30)  | 0.019  | 99.1% |       |        |       |
| Non-Mediterranean                  | 18 | -8.50 (-14.05, -2.96)  | 0.003  | 97.3% | 0.915 | <0.001 | -3.9% |
| <b>Health status at baseline</b>   |    |                        |        |       |       |        |       |
| Healthy                            | 9  | -8.61 (-21.49, 4.27)   | 0.190  | 98.7% |       |        |       |
| Unhealthy                          | 20 | -8.03 (-14.36, -1.70)  | 0.013  | 99.7% | 0.890 | <0.001 | -3.9% |

|                                    |    |                        |        |       |       |        |       |
|------------------------------------|----|------------------------|--------|-------|-------|--------|-------|
| <b>Intervention duration</b>       |    |                        |        |       |       |        |       |
| <6 months                          | 15 | -7.48 (-14.70, -0.26)  | 0.042  | 98.3% |       |        |       |
| ≥6 months                          | 14 | -9.10 (-17.33, -0.88)  | 0.030  | 99.8% | 0.724 | <0.001 | -3.4% |
| <b>Sample size</b>                 |    |                        |        |       |       |        |       |
| <150 participants                  | 21 | -7.95 (-14.14, -1.77)  | 0.012  | 97.6% |       |        |       |
| ≥150 participants                  | 8  | -9.00 (-19.20, 1.20)   | 0.084  | 99.9% | 0.871 | <0.001 | -4.1% |
| <b>Type of intervention</b>        |    |                        |        |       |       |        |       |
| MD alone                           | 20 | -10.03 (-16.53, -3.53) | 0.003  | 99.7% |       |        |       |
| MD with other dietary component    | 9  | -4.44 (-12.68, 3.81)   | 0.291  | 98.2% | 0.267 | <0.001 | 0.6%  |
| <b>Type of control treatment</b>   |    |                        |        |       |       |        |       |
| No treatment                       | 3  | -1.35 (-8.38, 5.68)    | 0.707  | 83.7% |       |        |       |
| Low-fat diet                       | 8  | -7.42 (-11.23, -3.62)  | <0.001 | 56.0% |       |        |       |
| Reduced energy, low-fat diet       | 2  | -0.54 (-22.68, 21.61)  | 0.962  | 97.8% |       |        |       |
| Healthy diet or dietary guidelines | 6  | -11.35 (-18.88, -3.81) | 0.003  | 97.0% |       |        |       |
| NCEP diet                          | 2  | -2.05 (-35.28, 31.17)  | 0.904  | 99.4% | 0.402 | <0.001 | -0.2% |
| HDL-cholesterol (mg/dL)            | 36 | 1.30 (0.38, 2.21)      | 0.005  | 98.1% |       |        |       |
| <b>Food supplementation</b>        |    |                        |        |       |       |        |       |
| Supplementation of foods           | 19 | 0.96 (-0.24, 2.15)     | 0.116  | 88.7% |       |        |       |
| No food supplementation            | 17 | 1.66 (0.51, 2.80)      | 0.004  | 96.3% | 0.556 | <0.001 | -2.5% |
| <b>Location</b>                    |    |                        |        |       |       |        |       |

|                                    |    |                    |        |       |       |        |       |
|------------------------------------|----|--------------------|--------|-------|-------|--------|-------|
| Mediterranean                      | 15 | 0.88 (-0.84, 2.61) | 0.227  | 98.4% |       |        |       |
| Non-Mediterranean                  | 21 | 1.68 (0.75, 2.61)  | 0.002  | 77.0% | 0.620 | <0.001 | -2.7% |
| <b>Health status at baseline</b>   |    |                    |        |       |       |        |       |
| Healthy                            | 11 | 1.55 (-1.91, 5.00) | 0.380  | 97.6% |       |        |       |
| Unhealthy                          | 25 | 1.27 (0.24, 2.30)  | 0.015  | 98.3% | 0.898 | <0.001 | -3.5% |
| <b>Intervention duration</b>       |    |                    |        |       |       |        |       |
| <6 months                          | 18 | 0.31 (-1.34, 1.95) | 0.714  | 92.1% |       |        |       |
| ≥6 months                          | 18 | 2.34 (1.05, 3.62)  | <0.001 | 98.9% | 0.081 | <0.001 | 8.3%  |
| <b>Sample size</b>                 |    |                    |        |       |       |        |       |
| <150 participants                  | 24 | 1.29 (-0.40, 2.99) | 0.135  | 95.3% |       |        |       |
| ≥150 participants                  | 12 | 1.38 (-0.09, 2.86) | 0.067  | 99.2% | 0.916 | <0.001 | -3.5% |
| <b>Type of intervention</b>        |    |                    |        |       |       |        |       |
| MD alone                           | 23 | 1.15 (-0.07, 2.38) | 0.065  | 98.4% |       |        |       |
| MD with other dietary component    | 13 | 1.55 (-0.26, 3.36) | 0.094  | 97.1% | 0.753 | <0.001 | -3.4% |
| <b>Type of control treatment</b>   |    |                    |        |       |       |        |       |
| No treatment                       | 4  | 1.06 (-1.75, 3.87) | 0.459  | 74.0% |       |        |       |
| Low-fat diet                       | 8  | 0.26 (-0.54, 1.05) | 0.526  | 0.0%  |       |        |       |
| Reduced energy, low-fat diet       | 4  | 1.57 (-0.13, 3.27) | 0.070  | 84.1% |       |        |       |
| Healthy diet or dietary guidelines | 8  | 1.48 (-1.52, 4.47) | 0.334  | 98.2% |       |        |       |
| NCEP diet                          | 2  | 2.40 (2.35, 2.45)  | <0.001 | 0.0%  | 0.898 | <0.001 | -4.0% |

|                                  |    |                         |        |       |       |        |       |
|----------------------------------|----|-------------------------|--------|-------|-------|--------|-------|
| Triglycerides (mg/dL)            | 38 | -12.30 (-15.60, -8.99)  | <0.001 | 94.8% |       |        |       |
| <b>Food supplementation</b>      |    |                         |        |       |       |        |       |
| Supplementation of foods         | 19 | -8.89 (-15.81, -1.97)   | 0.012  | 92.8% |       |        |       |
| No food supplementation          | 19 | -15.87 (-19.15, -12.59) | <0.001 | 91.7% | 0.167 | <0.001 | 5.4%  |
| <b>Location</b>                  |    |                         |        |       |       |        |       |
| Mediterranean                    | 16 | -14.19 (-18.58, -9.80)  | <0.001 | 93.1% |       |        |       |
| Non-Mediterranean                | 22 | -10.88 (-17.30, -4.46)  | 0.002  | 92.4% | 0.527 | <0.001 | -1.4% |
| <b>Health status at baseline</b> |    |                         |        |       |       |        |       |
| Healthy                          | 10 | -10.80 (-15.20, -6.39)  | <0.001 | 70.3% |       |        |       |
| Unhealthy                        | 28 | -12.81 (-16.71, -8.91)  | <0.001 | 95.1% | 0.816 | <0.001 | -3.9% |
| <b>Intervention duration</b>     |    |                         |        |       |       |        |       |
| <6 months                        | 18 | -8.75 (-14.72, -2.79)   | 0.004  | 91.1% |       |        |       |
| ≥6 months                        | 20 | -15.90 (-18.70, -13.09) | <0.001 | 87.1% | 0.164 | <0.001 | 4.1%  |
| <b>Sample size</b>               |    |                         |        |       |       |        |       |
| <150 participants                | 25 | -11.20 (-15.99, -6.42)  | <0.001 | 88.5% |       |        |       |
| ≥150 participants                | 13 | -14.75 (-19.65, -9.86)  | <0.001 | 96.2% | 0.611 | <0.001 | -1.8% |
| <b>Type of intervention</b>      |    |                         |        |       |       |        |       |
| MD alone                         | 23 | -21.91 (-22.13, -21.69) | <0.001 | 95.9% |       |        |       |
| MD with other dietary component  | 15 | -16.11 (-17.20, -15.03) | <0.001 | 82.9% | 0.569 | <0.001 | -1.9% |
| <b>Type of control treatment</b> |    |                         |        |       |       |        |       |

|                                    |    |                         |        |       |       |        |        |
|------------------------------------|----|-------------------------|--------|-------|-------|--------|--------|
| No treatment                       | 5  | -18.01 (-25.16, -10.86) | <0.001 | 65.1% |       |        |        |
| Low-fat diet                       | 8  | -7.17 (-18.33, 3.99)    | 0.208  | 70.5% |       |        |        |
| Reduced energy, low-fat diet       | 4  | -14.86 (-28.86, -0.87)  | 0.037  | 96.5% |       |        |        |
| Healthy diet or dietary guidelines | 9  | -13.71 (-18.26, -9.16)  | <0.001 | 88.6% |       |        |        |
| NCEP diet                          | 2  | -18.58 (-28.85, -8.32)  | <0.001 | 64.6% | 0.781 | <0.001 | -3.8%  |
| <b>Inflammatory markers</b>        |    |                         |        |       |       |        |        |
| C-reactive protein (mg/L)          | 13 | -0.77 (-1.44, -0.39)    | <0.001 | 92.6% |       |        |        |
| <b>Food supplementation</b>        |    |                         |        |       |       |        |        |
| Supplementation of foods           | 10 | -0.95 (-1.78, -0.12)    | 0.024  | 94.0% |       |        |        |
| No food supplementation            | 3  | -0.69 (-0.88, -0.49)    | <0.001 | 73.6% | 0.610 | <0.001 | -15.0% |
| <b>Location</b>                    |    |                         |        |       |       |        |        |
| Mediterranean                      | 4  | -1.08 (-1.57, -0.58)    | <0.001 | 95.5% |       |        |        |
| Non-Mediterranean                  | 9  | -0.67 (-1.37, 0.03)     | 0.061  | 89.2% | 0.761 | <0.001 | -10.8% |
| <b>Health status at baseline</b>   |    |                         |        |       |       |        |        |
| Healthy                            | 3  | -0.63 (-0.85, -0.41)    | <0.001 | 16.3% |       |        |        |
| Unhealthy                          | 10 | -0.76 (-1.38, -0.13)    | 0.017  | 94.3% | 0.818 | <0.001 | -16.0% |
| <b>Intervention duration</b>       |    |                         |        |       |       |        |        |
| <6 months                          | 7  | -0.87 (-1.69, -0.05)    | 0.038  | 91.8% |       |        |        |
| ≥6 months                          | 6  | -0.90 (-1.35, -0.45)    | <0.001 | 92.8% | 0.745 | <0.001 | -19.3% |
| <b>Sample size</b>                 |    |                         |        |       |       |        |        |

|                                  |    |                      |        |       |       |        |        |
|----------------------------------|----|----------------------|--------|-------|-------|--------|--------|
| <150 participants                | 10 | -0.63 (-1.14, -0.12) | 0.016  | 90.8% |       |        |        |
| ≥150 participants                | 3  | -1.03 (-2.79, 0.73)  | 0.253  | 96.9% | 0.727 | <0.001 | -9.8%  |
| <b>Type of intervention</b>      |    |                      |        |       |       |        |        |
| MD alone                         | 9  | -1.09 (-1.99, -0.19) | 0.018  | 94.6% |       |        |        |
| MD with other dietary component  | 4  | -0.65 (-0.87, -0.43) | <0.001 | 72.4% | 0.377 | 0.012  | -7.5%  |
| <b>Type of control treatment</b> |    |                      |        |       |       |        |        |
| No treatment                     | 2  | -3.66 (-6.21, -1.12) | 0.005  | 54.6% |       |        |        |
| Low-fat diet                     | 5  | -0.51 (-2.08, 1.06)  | 0.522  | 96.1% |       |        |        |
| Reduced energy, low-fat diet     | 2  | -0.18 (-1.30, 0.95)  | 0.760  | 70.3% | 0.700 | <0.001 | -18.2% |

---

CI, confidence intervals; HDL, high density lipoprotein cholesterol; HOMA-IR, homeostatic model assessment of insulin resistance; LDL, low density lipoprotein cholesterol; MD, mean difference; NCEP, National Cholesterol Education programme.

\*Findings are based on random-effects meta-analysis (inverse variance) and meta-regressions.  $I^2$  represents the magnitude of heterogeneity. Subgroup analyses were conducted, with studies stratified according to food supplementation, location, health status at baseline, intervention duration, sample size, type of intervention and type of control treatment. For reference, the first line for each outcome presents the findings before the subgroup analysis took place. Subgroup analyses were only conducted for outcomes with at least 10 studies included.

**Supplementary Table S14.** Effect of the Mediterranean diet on anthropometric, blood pressure, biochemical, insulin resistance, oxidative stress, inflammatory and endothelial function markers related to the metabolic syndrome (sensitivity analysis, following the exclusion of non-randomised controlled trials, cross-over trials and trials with  $\geq 1,000$  participants)\*

| Outcome and/or subgroup                                  | Studies | Participants | Effect estimate (MD, 95% CI) | P-value | I <sup>2</sup> |
|----------------------------------------------------------|---------|--------------|------------------------------|---------|----------------|
| <b>Anthropometric markers</b>                            |         |              |                              |         |                |
| Body weight (kg)                                         | 40      | 12571        | -1.72 (-2.40, -1.04)         | <0.001  | 99.0%          |
| After exclusion of non-randomised trials                 | 36      | 12421        | -1.69 (-2.40, -0.98)         | <0.001  | 99.0%          |
| After exclusion of cross-over trials                     | 33      | 12251        | -1.84 (-2.57, -1.11)         | <0.001  | 99.0%          |
| After exclusion of both the above                        | 30      | 12105        | -2.04 (-2.80, -1.29)         | <0.001  | 99.0%          |
| After exclusion of studies with $\geq 1000$ participants | 38      | 4124         | -1.75 (-2.72, -0.78)         | <0.001  | 98.6%          |
| Body mass index (kg/m <sup>2</sup> )                     | 37      | 5679         | -0.41 (-0.71, -0.10)         | 0.010   | 99.0%          |
| After exclusion of non-randomised trials                 | 32      | 5373         | -0.43 (-0.76, -0.10)         | 0.010   | 99.0%          |
| After exclusion of cross-over trials                     | 31      | 5381         | -0.42 (-0.61, -0.23)         | <0.001  | 89.0%          |
| After exclusion of both the above                        | 28      | 5150         | -0.49 (-0.85, -0.14)         | 0.007   | 99.0%          |
| After exclusion of studies with $\geq 1000$ participants | 36      | 4679         | -0.38 (-0.69, -0.07)         | 0.015   | 98.6%          |
| Waist circumference (cm)                                 | 27      | 9690         | -1.47 (-2.54, -0.39)         | 0.007   | 100.0%         |
| After exclusion of non-randomised trials                 | 24      | 9564         | -0.94 (-2.08, 0.19)          | 0.100   | 100.0%         |
| After exclusion of cross-over trials                     | 23      | 9525         | -1.24 (-1.78, -0.70)         | <0.001  | 90.0%          |
| After exclusion of both the above                        | 21      | 9433         | -1.13 (-1.69, -0.58)         | <0.001  | 90.0%          |
| After exclusion of studies with $\geq 1000$ participants | 26      | 2243         | -1.52 (-2.62, -0.41)         | 0.007   | 99.6%          |
| Total fat mass (kg)                                      | 9       | 963          | -0.47 (-1.53, 0.60)          | 0.390   | 85.0%          |
| After exclusion of non-randomised trials                 | 9       | 963          | -0.47 (-1.53, 0.60)          | 0.390   | 85.0%          |
| After exclusion of cross-over trials                     | 6       | 716          | -1.38 (-2.97, 0.21)          | 0.090   | 89.0%          |
| After exclusion of both the above                        | 6       | 716          | -1.38 (-2.97, 0.21)          | 0.090   | 89.0%          |
| After exclusion of studies with $\geq 1000$ participants | 9       | 963          | -0.47 (-1.53, 0.60)          | 0.390   | 85.0%          |
| Total body fat (%)                                       | 8       | 661          | -0.12 (-1.60, 1.37)          | 0.880   | 90.0%          |
| After exclusion of non-randomised trials                 | 8       | 661          | -0.12 (-1.60, 1.37)          | 0.880   | 90.0%          |
| After exclusion of cross-over trials                     | 6       | 554          | -0.88 (-2.49, 0.72)          | 0.280   | 87.0%          |
| After exclusion of both the above                        | 6       | 554          | -0.88 (-2.49, 0.72)          | 0.280   | 87.0%          |
| After exclusion of studies with $\geq 1000$ participants | 8       | 661          | -0.12 (-1.60, 1.37)          | 0.880   | 90.0%          |
| <b>Blood pressure</b>                                    |         |              |                              |         |                |
| Systolic blood pressure (mm Hg)                          | 27      | 4930         | -1.33 (-2.00, -0.67)         | <0.001  | 94.0%          |
| After exclusion of non-randomised trials                 | 22      | 4624         | -1.94 (-2.55, -1.33)         | <0.001  | 91.0%          |



|                                                          |    |      |                       |        |        |
|----------------------------------------------------------|----|------|-----------------------|--------|--------|
| After exclusion of cross-over trials                     | 22 | 4717 | -1.27 (-1.97, -0.58)  | <0.001 | 94.0%  |
| After exclusion of both the above                        | 18 | 4445 | -1.34 (-2.02, -0.66)  | <0.001 | 94.0%  |
| After exclusion of studies with $\geq 1000$ participants | 25 | 2802 | -1.10 (-1.89, -0.31)  | 0.006  | 91.3%  |
| Diastolic blood pressure (mm Hg)                         | 27 | 4930 | -0.81 (-1.30, -0.32)  | 0.001  | 93.0%  |
| After exclusion of non-randomised trials                 | 22 | 4624 | -0.94 (-1.48, -0.41)  | <0.001 | 93.0%  |
| After exclusion of cross-over trials                     | 22 | 4717 | -0.65 (-1.17, -0.13)  | 0.010  | 94.0%  |
| After exclusion of both the above                        | 18 | 4445 | -0.75 (-1.32, -0.19)  | 0.009  | 94.0%  |
| After exclusion of studies with $\geq 1000$ participants | 25 | 2802 | -0.70 (-1.24, -0.15)  | 0.013  | 88.1%  |
| <b>Biochemical markers</b>                               |    |      |                       |        |        |
| Glucose (mg/dL)                                          | 31 | 3662 | -2.98 (-4.54, -1.42)  | <0.001 | 98.0%  |
| After exclusion of non-randomised trials                 | 28 | 3536 | -3.05 (-4.69, -1.40)  | <0.001 | 98.0%  |
| After exclusion of cross-over trials                     | 24 | 3313 | -4.07 (-5.87, -2.27)  | <0.001 | 98.0%  |
| After exclusion of both the above                        | 22 | 3221 | -4.21 (-6.09, -2.33)  | <0.001 | 98.0%  |
| After exclusion of studies with $\geq 1000$ participants | 30 | 2662 | -2.91 (-4.89, -0.94)  | 0.004  | 98.0%  |
| Insulin ( $\mu$ U/mL)                                    | 20 | 2184 | -0.94 (-1.72, -0.16)  | 0.020  | 97.0%  |
| After exclusion of non-randomised trials                 | 20 | 2184 | -0.94 (-1.72, -0.16)  | 0.020  | 97.0%  |
| After exclusion of cross-over trials                     | 15 | 1913 | -0.77 (-1.71, 0.17)   | 0.110  | 97.0%  |
| After exclusion of both the above                        | 15 | 1913 | -0.77 (-1.71, 0.17)   | 0.110  | 97.0%  |
| After exclusion of studies with $\geq 1000$ participants | 20 | 2184 | -0.94 (-1.72, -0.16)  | 0.020  | 97.0%  |
| HOMA-IR index                                            | 17 | 2098 | -0.44 (-0.72, -0.15)  | 0.003  | 98.0%  |
| After exclusion of non-randomised trials                 | 16 | 2064 | -0.41 (-0.70, -0.12)  | 0.006  | 98.0%  |
| After exclusion of cross-over trials                     | 14 | 1999 | -0.35 (-0.66, -0.04)  | 0.030  | 98.0%  |
| After exclusion of both the above                        | 14 | 1999 | -0.35 (-0.66, -0.04)  | 0.030  | 98.0%  |
| After exclusion of studies with $\geq 1000$ participants | 17 | 2098 | -0.44 (-0.72, -0.15)  | 0.003  | 98.0%  |
| HbA1c (%)                                                | 6  | 869  | -0.16, (-0.37, 0.05)  | 0.140  | 78.0%  |
| After exclusion of non-randomised trials                 | 5  | 713  | -0.29, (-0.40, -0.18) | <0.001 | 4.0%   |
| After exclusion of cross-over trials                     | 6  | 869  | -0.16, (-0.37, 0.05)  | 0.140  | 78.0%  |
| After exclusion of both the above                        | 5  | 713  | -0.29, (-0.40, -0.18) | <0.001 | 4.0%   |
| After exclusion of studies with $\geq 1000$ participants | 6  | 869  | -0.16, (-0.37, 0.05)  | 0.140  | 78.0%  |
| Total cholesterol (mg/dL)                                | 37 | 4603 | -5.70 (-9.96, -1.43)  | 0.009  | 99.0%  |
| After exclusion of non-randomised trials                 | 32 | 4391 | -8.86 (-13.07, -4.65) | <0.001 | 98.0%  |
| After exclusion of cross-over trials                     | 32 | 4221 | -5.11 (-9.36, -0.86)  | 0.020  | 98.0%  |
| After exclusion of both the above                        | 28 | 4043 | -8.43 (-12.41, -4.45) | <0.001 | 98.0%  |
| After exclusion of studies with $\geq 1000$ participants | 36 | 3603 | -5.22 (-8.93, -1.52)  | 0.006  | 95.9%  |
| LDL-cholesterol (mg/dL)                                  | 29 | 3633 | -8.24 (-13.50, -2.99) | 0.002  | 100.0% |
| After exclusion of non-randomised trials                 | 24 | 3289 | -9.71 (-15.54, -3.87) | 0.001  | 100.0% |
| After exclusion of cross-over trials                     | 24 | 3330 | -9.01 (-14.74, -3.29) | 0.002  | 100.0% |

|                                                          |    |      |                        |        |        |
|----------------------------------------------------------|----|------|------------------------|--------|--------|
| After exclusion of both the above                        | 20 | 3020 | -9.93 (-16.30, -3.56)  | 0.002  | 100.0% |
| After exclusion of studies with $\geq 1000$ participants | 28 | 2633 | -7.84 (-12.17, -3.5)   | <0.001 | 98.3%  |
| HDL-cholesterol (mg/dL)                                  | 36 | 4433 | 1.30 (0.38, 2.21)      | 0.005  | 98.0%  |
| After exclusion of non-randomised trials                 | 31 | 4221 | 0.93 (-0.06, 1.92)     | 0.060  | 98.0%  |
| After exclusion of cross-over trials                     | 30 | 4106 | 1.58 (0.56, 2.61)      | 0.002  | 98.0%  |
| After exclusion of both the above                        | 26 | 3928 | 1.16 (0.06, 2.26)      | 0.040  | 99.0%  |
| After exclusion of studies with $\geq 1000$ participants | 35 | 3433 | 1.28 (0.12, 2.44)      | 0.031  | 96.8%  |
| Triglycerides (mg/dL)                                    | 38 | 4658 | -12.30 (-15.60, -8.99) | <0.001 | 95.0%  |
| After exclusion of non-randomised trials                 | 33 | 4314 | -13.32 (-16.71, -9.93) | <0.001 | 94.0%  |
| After exclusion of cross-over trials                     | 32 | 4331 | -11.56 (-15.23, -7.88) | <0.001 | 95.0%  |
| After exclusion of both the above                        | 28 | 4021 | -13.47 (-17.17, -9.76) | <0.001 | 95.0%  |
| After exclusion of studies with $\geq 1000$ participants | 37 | 3658 | -11.86 (-15.44, -8.28) | <0.001 | 90.9%  |
| Non-HDL-cholesterol (mg/dL)                              | 2  | 584  | -0.06 (-0.59, 0.47)    | 0.840  | 60.0%  |
| After exclusion of non-randomised trials                 | 2  | 584  | -0.06 (-0.59, 0.47)    | 0.840  | 60.0%  |
| After exclusion of cross-over trials                     | 2  | 584  | -0.06 (-0.59, 0.47)    | 0.840  | 60.0%  |
| After exclusion of both the above                        | 2  | 584  | -0.06 (-0.59, 0.47)    | 0.840  | 60.0%  |
| After exclusion of studies with $\geq 1000$ participants | 2  | 584  | -0.06 (-0.59, 0.47)    | 0.840  | 60.0%  |
| Total:HDL-cholesterol ratio                              | 6  | 670  | -0.83 (-2.67, 1.01)    | 0.380  | 100.0% |
| After exclusion of non-randomised trials                 | 5  | 646  | -1.03 (-3.06, 1.01)    | 0.320  | 100.0% |
| After exclusion of cross-over trials                     | 5  | 629  | -0.21 (-0.53, 0.11)    | 0.200  | 70.0%  |
| After exclusion of both the above                        | 4  | 605  | -0.25 (-0.61, 0.10)    | 0.160  | 77.0%  |
| After exclusion of studies with $\geq 1000$ participants | 6  | 670  | -0.83 (-2.67, 1.01)    | 0.380  | 100.0% |
| Homocysteine ( $\mu\text{mol/L}$ )                       | 2  | 171  | -0.04 (-0.61, 0.53)    | 0.880  | 0.0%   |
| After exclusion of non-randomised trials                 | 2  | 171  | -0.04 (-0.61, 0.53)    | 0.880  | 0.0%   |
| After exclusion of cross-over trials                     | 2  | 171  | -0.04 (-0.61, 0.53)    | 0.880  | 0.0%   |
| After exclusion of both the above                        | 2  | 171  | -0.04 (-0.61, 0.53)    | 0.880  | 0.0%   |
| After exclusion of studies with $\geq 1000$ participants | 2  | 171  | -0.04 (-0.61, 0.53)    | 0.880  | 0.0%   |
| AST (UI/L)                                               | 3  | 193  | -3.44 (-7.55, 0.68)    | 0.100  | 98.0%  |
| After exclusion of non-randomised trials                 | 2  | 159  | -1.22 (-5.43, 2.99)    | 0.570  | 98.0%  |
| After exclusion of cross-over trials                     | 1  | 41   | -3.40 (-4.45, -2.35)   | <0.001 | -      |
| After exclusion of both the above                        | 1  | 41   | -3.40 (-4.45, -2.35)   | <0.001 | -      |
| After exclusion of studies with $\geq 1000$ participants | 3  | 193  | -3.44 (-7.55, 0.68)    | 0.100  | 98.0%  |
| ALT (UI/L)                                               | 8  | 729  | -5.66 (-9.44, -1.87)   | 0.003  | 97.0%  |
| After exclusion of non-randomised trials                 | 7  | 695  | -2.39 (-5.77, 0.99)    | 0.170  | 96.0%  |
| After exclusion of cross-over trials                     | 5  | 553  | -3.72 (-6.89, -0.55)   | 0.020  | 80.0%  |
| After exclusion of both the above                        | 5  | 553  | -3.72 (-6.89, -0.55)   | 0.020  | 80.0%  |
| After exclusion of studies with $\geq 1000$ participants | 8  | 729  | -5.66 (-9.44, -1.87)   | 0.003  | 97.0%  |

|                                                          |    |      |                       |        |       |
|----------------------------------------------------------|----|------|-----------------------|--------|-------|
| GGT (UI/L)                                               | 7  | 393  | -2.51 (-5.38, 0.35)   | 0.090  | 64.0% |
| After exclusion of non-randomised trials                 | 6  | 359  | -2.51 (-5.46, 0.44)   | 0.090  | 70.0% |
| After exclusion of cross-over trials                     | 4  | 217  | -2.98 (-7.94, 1.98)   | 0.240  | 71.0% |
| After exclusion of both the above                        | 4  | 217  | -2.98 (-7.94, 1.98)   | 0.240  | 71.0% |
| After exclusion of studies with $\geq 1000$ participants | 7  | 393  | -2.51 (-5.38, 0.35)   | 0.090  | 64.0% |
| Hepatic fat mass (%)                                     | 3  | 224  | -2.80 (-5.52, -0.08)  | 0.040  | 79.0% |
| After exclusion of non-randomised trials                 | 3  | 224  | -2.80 (-5.52, -0.08)  | 0.040  | 79.0% |
| After exclusion of cross-over trials                     | 2  | 200  | -2.04 (-5.95, 1.88)   | 0.310  | 86.0% |
| After exclusion of both the above                        | 2  | 200  | -2.04 (-5.95, 1.88)   | 0.310  | 86.0% |
| After exclusion of studies with $\geq 1000$ participants | 3  | 224  | -2.80 (-5.52, -0.08)  | 0.040  | 79.0% |
| <b>Oxidative stress markers</b>                          |    |      |                       |        |       |
| Oxidised LDL-cholesterol (U/L)                           | 2  | 970  | 4.38 (-16.49, 25.25)  | 0.680  | 98.0% |
| After exclusion of non-randomised trials                 | 1  | 930  | -6.30 (-11.08, -1.52) | 0.010  | -     |
| After exclusion of cross-over trials                     | 2  | 970  | 4.38 (-16.49, 25.25)  | 0.680  | 98.0% |
| After exclusion of both the above                        | 1  | 930  | -6.30 (-11.08, -1.52) | 0.010  | -     |
| After exclusion of studies with $\geq 1000$ participants | 2  | 970  | 4.38 (-16.49, 25.25)  | 0.680  | 98.0% |
| <b>Inflammatory markers</b>                              |    |      |                       |        |       |
| C-reactive protein (mg/L)                                | 13 | 1071 | -0.77 (-1.14, -0.39)  | <0.001 | 93.0% |
| After exclusion of non-randomised trials                 | 12 | 1031 | -0.70 (-1.10, -0.30)  | <0.001 | 93.0% |
| After exclusion of cross-over trials                     | 11 | 964  | -0.99 (-1.35, -0.63)  | <0.001 | 89.0% |
| After exclusion of both the above                        | 10 | 924  | -0.94 (-1.33, -0.55)  | <0.001 | 89.0% |
| After exclusion of studies with $\geq 1000$ participants | 13 | 1071 | -0.77 (-1.14, -0.39)  | <0.001 | 93.0% |
| Interleukin-6 (pg/mL)                                    | 4  | 261  | -0.61 (-0.93, -0.29)  | <0.001 | 0.0%  |
| After exclusion of non-randomised trials                 | 4  | 261  | -0.61 (-0.93, -0.29)  | <0.001 | 0.0%  |
| After exclusion of cross-over trials                     | 4  | 261  | -0.61 (-0.93, -0.29)  | <0.001 | 0.0%  |
| After exclusion of both the above                        | 4  | 261  | -0.61 (-0.93, -0.29)  | <0.001 | 0.0%  |
| After exclusion of studies with $\geq 1000$ participants | 4  | 261  | -0.61 (-0.93, -0.29)  | <0.001 | 0.0%  |
| Adiponectin ( $\mu$ g/mL)                                | 4  | 546  | 0.76 (-1.16, 2.67)    | 0.440  | 70.0% |
| After exclusion of non-randomised trials                 | 4  | 546  | 0.76 (-1.16, 2.67)    | 0.440  | 70.0% |
| After exclusion of cross-over trials                     | 4  | 546  | 0.76 (-1.16, 2.67)    | 0.440  | 70.0% |
| After exclusion of both the above                        | 4  | 546  | 0.76 (-1.16, 2.67)    | 0.440  | 70.0% |
| After exclusion of studies with $\geq 1000$ participants | 4  | 546  | 0.76 (-1.16, 2.67)    | 0.440  | 70.0% |
| Tumor necrosis factor- $\alpha$ (pg/mL)                  | 2  | 283  | -0.81 (-1.03, -0.60)  | <0.001 | 0.0%  |
| After exclusion of non-randomised trials                 | 2  | 283  | -0.81 (-1.03, -0.60)  | <0.001 | 0.0%  |
| After exclusion of cross-over trials                     | 1  | 165  | -1.20 (-2.33, -0.07)  | 0.040  | -     |
| After exclusion of both the above                        | 1  | 165  | -1.20 (-2.33, -0.07)  | 0.040  | -     |
| After exclusion of studies with $\geq 1000$ participants | 2  | 283  | -0.81 (-1.03, -0.60)  | <0.001 | 0.0%  |

## Markers of endothelial function

|                                                          |   |     |                   |        |      |
|----------------------------------------------------------|---|-----|-------------------|--------|------|
| Flow-mediated dilatation (%)                             | 3 | 206 | 1.49 (0.61, 2.37) | <0.001 | 0.0% |
| After exclusion of non-randomised trials                 | 3 | 206 | 1.49 (0.61, 2.37) | <0.001 | 0.0% |
| After exclusion of cross-over trials                     | 3 | 206 | 1.49 (0.61, 2.37) | <0.001 | 0.0% |
| After exclusion of both the above                        | 3 | 206 | 1.49 (0.61, 2.37) | <0.001 | 0.0% |
| After exclusion of studies with $\geq 1000$ participants | 3 | 206 | 1.49 (0.61, 2.37) | <0.001 | 0.0% |

ALT, alanine transaminase; AST, aspartame transaminase; CI, confidence intervals; GGT, gamma glutamyl transferase; HDL, high density lipoprotein cholesterol; HbA1c, glycosylated haemoglobin; HOMA-IR, homeostatic model assessment of insulin resistance; LDL, low density lipoprotein cholesterol; MD, mean difference.

\* Findings are based on random-effects meta-analysis (inverse variance).  $I^2$  represents the magnitude of heterogeneity. For reference, the first line for each outcome presents the findings before the sensitivity analysis took place.
